# Supplementary material for: Network machine learning maps phytochemically rich “Hyperfoods” to fight COVID-19
Source: Hum Genomics. 2021 Jan 2;15:1. doi: 10.1186/s40246-020-00297-x (PMC7775839; doi:10.1186/s40246-020-00297-x)
Supplement: Supplementary file 5 — Additional file 5. Anti-SARS-CoV-2 predicted drugs and foods. [file 40246_2020_297_MOESM5_ESM.xlsx]

## Sheet: anti SARS-CoV-2-drugs
Approved drugs
ID	Name	Target_Label	Anti-cancer properties	InChIKey	Class (Class/Subclass)	Mechanism	Reference	GeoMean(r_vals(neg)_median)	GeoMean(r_vals(neg)_MAD)	wiki_r_vals(neg)_median	wiki_r_vals(neg)_MAD	wiki_Normalized_correlation_median	wiki_Normalized_correlation_MAD	wiki_Gene_connection_counts_median	wiki_Gene_connection_counts_MAD	wiki_Probability_estimate_median	wiki_Probability_estimate_MAD	aggr_r_vals(neg)_median	aggr_r_vals(neg)_MAD	aggr_Normalized_correlation_median	aggr_Normalized_correlation_MAD	aggr_Gene_connection_counts_median	aggr_Gene_connection_counts_MAD	aggr_Probability_estimate_median	aggr_Probability_estimate_MAD
DB00724	Imiquimod	-1	1	DOUYETYNHWVLEO-UHFFFAOYSA-N	Quinolines and derivatives/Imidazoquinolines	Antiviral : Agonist of toll like receptor 7 (TLR7), which is crucial in recognising single-stranded RNA viruses, including SARS-CoV-2 virus. TLR generates antiviral immunity and acts to induce favourable type I interferon (type I IFN) response. Type I IFNs then induce expression of interferon stimulated genes (ISGs) which inhibit viral replication.	Avcilar, Huseyin, and Ahmet Eken. 2020. “Could Imiquimod (Aldara 5% Cream) or Other TLR7 Agonists Be Used in the Treatment of COVID-19?” Medical Hypotheses 144: 110202. https://www.sciencedirect.com/science/article/pii/S0306987720314171?via%3Dihub (November 16, 2020).	0.000575	0.000407	0.000469	0.000235	4.75174	0.802013	161	0	0.99648	0.001277	0.000704	0.000704	4.93456	0.909844	25	10	0.998681	0.001182
DB00997	Doxorubicin	-1	1	AOJJSUZBOXZQNB-TZSSRYMLSA-N	Anthracyclines/NA	Anti-SARS-CoV-2 : Research suggesting that SARS-CoV-2 contains residues that are sensitive to the reactive glycating agent methylglyoxal (MG) and that Doxorubicin caused cellular increases of MG. This therefore indicates a potential anti-SARS-CoV-2 mechanism of Doxorubicin.	Al-Motawa, Maryam S. et al. 2020. “Vulnerabilities of the SARS-CoV-2 Virus to Proteotoxicity—Opportunity for Repurposed Chemotherapy of COVID-19 Infection.” Frontiers in Pharmacology 11: 1579. https://www.frontiersin.org/article/10.3389/fphar.2020.585408/full (November 16, 2020).	0.002288	0	0.001174	0	4.30416	0.92709	300	0	0.993198	0.003301	0.00446	0.002817	3.72581	0.802012	26	11	0.990009	0.00745
BRD-A42383464	actinomycin-d	0	1	RJURFGZVJUQBHK-UHFFFAOYSA-N	Peptidomimetics/Depsipeptides	Actinomycin-d (dactinomycin) binds to DNA, preventing RNA synthesis. Specifically by inhibiting the function of DNA topoisomerase 2-alpha (TOP2A) and DNA topoisomerase 2-beta (TOP2B).	Zhou, Yadi et al. 2020. “Network-Based Drug Repurposing for Novel Coronavirus 2019-NCoV/SARS-CoV-2.” Cell Discovery 6(1): 14. http://www.nature.com/articles/s41421-020-0153-3 (November 16, 2020).	0.003591	0.000996	0.006103	0.000469	3.49436	0.588925	301	0	0.977817	0.006733	0.002113	0.002113	4.85334	1.44917	25	9	0.997041	0.00278
DB00608	Chloroquine	1	0	WHTVZRBIWZFKQO-UHFFFAOYSA-N	Quinolines and derivatives/Aminoquinolines and derivatives	Multiple mechanisms of action for example inhibition of haem polymerase in malaria therapy	https://www.drugbank.ca/drugs/DB00608 ; ﻿Khuroo, Mohammad Sultan. 2020. “Chloroquine and Hydroxychloroquine in Coronavirus Disease 2019 (COVID-19). Facts, Fiction and the Hype: A Critical Appraisal.” International journal of antimicrobial agents 56(3): 106101. http://www.ncbi.nlm.nih.gov/pubmed/32687949 (November 16, 2020).	0.004066	0	0.001408	0	4.22223	0.823746	300	0	0.992329	0.003218	0.011737	0.005869	3.06363	0.413403	33	17	0.973043	0.012265
DB00544	Fluorouracil	-1	1	GHASVSINZRGABV-UHFFFAOYSA-N	Diazines/Pyrimidines and pyrimidine derivatives	No effect: Fluorouracil (also 5-fluorouracil)(5-FU) can be incorporated into RNA instead of uridine 5-triphosphate (UTP), which interferes with RNA processing and protein synthesis. This can disrupt viral RNA replication and elicit an antiviral effect. However, 5-FU is ineffective against coronaviruses, attributed to the high proofreading ability of coronaviruses by the 3′ to 5′ exoribonuclease i…	﻿Ahmad, Shamim I. 2020. “5-Fluorouracil in Combination with Deoxyribonucleosides and Deoxyribose as Possible Therapeutic Options for the Coronavirus, COVID-19 Infection.” Medical Hypotheses 142: 109754. https://www.sciencedirect.com/science/article/pii/S0306987720305788 (November 16, 2020) ; https://go.drugbank.com/drugs/DB00544	0.004528	0	0.000704	0	4.6654	1.0877	301	0	0.996003	0.002222	0.029108	0.028169	1.95121	0.567919	25	10	0.888815	0.068006
DB01222	Budesonide	-1	0	VOVIALXJUBGFJZ-KWVAZRHASA-N	Steroids and steroid derivatives/Hydroxysteroids	Anti-inflammatory: This gluticosteroid can inhibit expression of inflammatory transcription factors e.g. nuclear factor kappa-light-chain-enhancer of activated B cells (NFkB) and promote anti-inflammatory genes e.g. interleukin-10 (IL-10) (DrugBank). Additional evidence that budesonide inhibits coronavirus (HCoV-229E) replication (by receptor expression inhibition) and modulates infection-induced…	﻿Yamaya, Mutsuo et al. 2020. “Inhibitory Effects of Glycopyrronium, Formoterol, and Budesonide on Coronavirus HCoV-229E Replication and Cytokine Production by Primary Cultures of Human Nasal and Tracheal Epithelial Cells.” Respiratory investigation 58(3): 155–68. http://www.ncbi.nlm.nih.gov/pubmed/32094077 (November 16, 2020) ; https://go.drugbank.com/drugs/DB01222	0.004788	0.000813	0.006103	0.000235	3.45621	0.439496	136	0	0.97656	0.001137	0.003756	0.002817	4.23989	0.934028	25	5	0.991249	0.006986
DB06151	Acetylcysteine	0	0	PWKSKIMOESPYIA-BYPYZUCNSA-N	Carboxylic acids and derivatives/Amino acids, peptides, and analogues	Acetylcysteine regenerates liver stores of glutathione. This agent also reduces disulfide bonds in mucoproteins, resulting in liquification of mucus.	National Center for Biotechnology Information. "PubChem Compound Summary for CID 12035, Acetylcysteine" PubChem, https://pubchem.ncbi.nlm.nih.gov/compound/Acetylcysteine. Accessed 16 November, 2020.	0.005007	0.001676	0.001643	0.000235	4.19279	0.819357	305	0	0.99199	0.003357	0.015258	0.011972	2.98778	0.415804	25	10	0.968726	0.020496
DB00945	Acetylsalicylic acid	-1	0	BSYNRYMUTXBXSQ-UHFFFAOYSA-N	Benzene and substituted derivatives/Benzoic acids and derivatives	Anti-inflammatory / Antithrombotic: Acetylsalicylic acid (ASA) irreversibly inactivates cyclooxygenase 1 (COX1) and COX2, leading to inhibition of prostaglandin (PG) and thromboxane synthesis. Among other physiological benefits this produces anti-inflammatory, antipyretic and anticoagulatory effects. Its thrombotic effects are mediated by reduced production of thromboxane A2 and this may benefit …	﻿Warner, Timothy D, Sven Nylander, and Carl Whatling. 2011. “Anti-Platelet Therapy: Cyclo-Oxygenase Inhibition and the Use of Aspirin with Particular Regard to Dual Anti-Platelet Therapy.” British journal of clinical pharmacology 72(4): 619–33. http://www.ncbi.nlm.nih.gov/pubmed/21320154 (November 16, 2020) ; ﻿Bianconi, Vanessa et al. 2020. “Is Acetylsalicylic Acid a Safe and Potentially Useful C…	0.00527	0	0.000939	0	4.33148	0.835079	369	0	0.993466	0.002727	0.029577	0.023944	2.18847	0.513292	25	10	0.914397	0.068136
DB00290	Bleomycin	-1	1	OYVAGSVQBOHSSS-WXFSZRTFSA-O	Peptidomimetics/Hybrid peptides	Antiviral/negative: Bleomycin's mechanism of action involves inhibition of DNA synthesis by oxidative damage in addition to the attack of RNA and inhibition of protein synthesis. Damage to RNA by Bleomycin has been shown to inhibit replication of viruses Hepatitis C and HIV. However, Bleomycin at high doses can induce lung fibrosis, this can cause pulmonary insufficiency and potential hypoxemia a…	Aouida, Mustapha, and Dindial Ramotar. 4 Cancer Medicine Journal Review Article Issue 1 Citation: Dindial Ramotar, A Wider Scope for the Antibiotic and Anticancer Drug Bleomycin. www.tridhascholars.org (November 16, 2020).	0.005419	0	0.003052	0	3.98098	0.720436	302	0	0.989076	0.003964	0.009624	0.003286	3.39874	0.491171	25	10	0.977435	0.01237
DB01041	Thalidomide	1	1	UEJJHQNACJXSKW-UHFFFAOYSA-N	Isoindoles and derivatives/Isoindolines	Inhibit cytokine surge (reducing tumor necrosis factor-alpha (TNFα)) and regulate immune functions. Thalidomide has also been shown to activate T cell receptors and T cells to enhance immune functions (by increased secretion of IL-12, activating natural killer cells) this can reduce secondary bacterial infections.	﻿Viveiros Rosa, Sandro G, and Wilson C Santos. “Clinical Trials on Drug Repositioning for COVID-19 Treatment.” https://doi.org/10.26633/RPSP.2020.40 (November 16, 2020). ; ﻿Chen, Chengshui et al. 2020. “Thalidomide Combined with Low‐dose Short‐term Glucocorticoid in the Treatment of Critical Coronavirus Disease 2019.” Clinical and Translational Medicine 10(2). https://onlinelibrary.wiley.com/doi/…	0.005845	0.000813	0.004695	0.000235	3.67056	0.46467	303	0	0.982819	0.002729	0.007277	0.002817	3.43856	0.784189	26	11	0.982522	0.012756
DB00811	Ribavirin	0	0	IWUCXVSUMQZMFG-AFCXAGJDSA-N	Triazole ribonucleosides and ribonucleotides/NA	Antiviral: nucleotide analog, introduces mutations in RNA genome interfering with viral RNA replication.	Graci, Jason D, and Craig E Cameron. 2006. “Mechanisms of Action of Ribavirin against Distinct Viruses.” Reviews in medical virology 16(1): 37–48. http://www.ncbi.nlm.nih.gov/pubmed/16287208 (November 16, 2020).	0.006049	0	0.001878	0	4.14983	0.804016	301	0	0.991469	0.003513	0.019484	0.019484	2.34221	0.682502	25	7	0.942443	0.057197
DB00641	Simvastatin	-1	0	RYMZZMVNJRMUDD-HGQWONQESA-N	Lactones/ Delta valerolactones	Antiviral: Several potential mechanisms for a beneficial effect of Simvastatin. These include the hypothesis that statins in general reduce COVID-19 infectivity through removal of cholesterol . In addition, that they may reduce risk of cardiovascular complications that are symptomatic of COVID-19. Finally that statins may protect innate immune responses to viral infections through inhibiting the …	University of California - San Diego. "Statins reduce COVID-19 severity, likely by removing cholesterol that virus uses to infect." ScienceDaily. ScienceDaily, 23 September 2020. <www.sciencedaily.com/releases/2020/09/200923164603.htm> ; ﻿Gu, Chengyao, Yunqin Wu, Zhenyi Fan, and Weiwei Han. 2017. “Simvastatin Improves Intracerebral Hemorrhage through NF‑κB‑mediated Apoptosis via the MyD88/TRIF Si…	0.006166	0.002571	0.002347	0.000469	4.06753	0.723159	343	0	0.990376	0.003424	0.016197	0.014085	1.77241	0.836186	25	10	0.928122	0.067786
DB00877	Sirolimus	1	1	QFJCIRLUMZQUOT-HPLJOQBZSA-N	Macrolide lactams/NA	Sirolimus Inhibits T lymphocyte activation and proliferation that occurs in response to cytokines (IL-2, IL-4, and IL-15). This has potential applications to COVID-19 where these cytokines (IL-2 and IL-4) are at high levels and contribute to the hyperimmune activation. In addition, Sirolimus binds to the immunophilin, FK Binding Protein-12 (FKBP-12), to generate an immunosuppressive complex. This…	Sehgal, S N. 2003. “Sirolimus: Its Discovery, Biological Properties, and Mechanism of Action.” Transplantation proceedings 35(3 Suppl): 7S-14S. http://www.ncbi.nlm.nih.gov/pubmed/12742462 (November 16, 2020).	0.006321	0	0.001174	0	4.31853	0.945351	300	0	0.993341	0.003304	0.034038	0.017371	2.32555	0.506668	25	8	0.917909	0.033892
DB00773	Etoposide	-1	1	VJJPUSNTGOMMGY-MRVIYFEKSA-N	Lignans, neolignans and related compounds/ Lignan lactones	Etoposide induces double strand DNA breaks and inhibits TOP2 function. Topoisomerase inhibitors have been shown to effectively treat cytokine storms and hence may be therapeutic against cytokine storms in COVID-19 patients.	Patel, Maulin et al. 2020. “Etoposide as Salvage Therapy for Cytokine Storm Due to COVID-19.” Chest 0(0). http://www.ncbi.nlm.nih.gov/pubmed/32931823 (November 16, 2020).	0.006864	0.002019	0.002113	0.000235	4.08911	0.842844	304	0	0.990675	0.004162	0.0223	0.017371	2.51841	0.797744	26	10	0.943014	0.040123
BRD-K01228321	cisplatin	0	1	CLSUSRZJUQMOHH-UHFFFAOYSA-L	Transition metal salts/Transition metal chlorides	N/A	N/A	0.007254	0.002363	0.001878	0.000235	4.19298	0.863095	377	0	0.991993	0.003613	0.028022	0.023796	2.14547	0.577369	26	11	0.902429	0.07508
DB00328	Indomethacin	1	0	CGIGDMFJXJATDK-UHFFFAOYSA-N	Indoles and derivatives/Benzoylindoles	Nonsteroidal anti-inflammatory drug (NSAID), COX1/2 inhibitor (COX metabolites are active against RNA viruses), blocking viral RNA synthesis.	Amici, Carla et al. 2015. “Inhibition of Viral Protein Translation by Indomethacin in Vesicular Stomatitis Virus Infection: Role of EIF2α Kinase PKR.” Cellular Microbiology 17(9): 1391–1404. http://doi.wiley.com/10.1111/cmi.12446 (November 16, 2020).	0.007926	0	0.004695	0	3.57595	0.425108	393	0	0.980289	0.002543	0.01338	0.005399	3.02201	0.429611	26	10	0.96499	0.020589
DB06774	Capsaicin	-1	0	YKPUWZUDDOIDPM-SOFGYWHQSA-N	Phenols/Methoxyphenols	Capsaicin is an agonist of the transient receptor potential cation channel subfamily V member 1 (TRPV1) receptor. TRPV1+ cells are involved in pain, inflammation and immunomodulation. It has been suggested that physiological events and morbidity during COVID-19 are linked to TRPV1 neuronal system in the lungs. Furthermore, other TRPV1 agonists (resiniferatoxin) are suggested for COVID-19 trials.	﻿Nahama, Alexis, Roshni Ramachandran, Alvaro Francisco Cisternas, and Henry Ji. 2020. “The Role of Afferent Pulmonary Innervation in ARDS Associated with COVID-19 and Potential Use of Resiniferatoxin to Improve Prognosis: A Review.” Medicine in drug discovery 5: 100033. http://www.ncbi.nlm.nih.gov/pubmed/32292906 (November 16, 2020).	0.008098	0	0.003991	0	3.72964	0.59829	314	0	0.984234	0.004488	0.016432	0.005634	2.9077	0.357104	25	10	0.960356	0.020393
DB01229	Paclitaxel	-1	1	RCINICONZNJXQF-MZXODVADSA-N	Prenol lipids/Diterpenoids	Antiviral: Paclitaxel is a member of microtubule inhibiting drugs which hyper-stabilizes tubulin structures. Microtubule inhibition has been suggested as antiviral through entry and viral replication inhibition, where the cell cytoskeleton has been shown to be involved in viral entry of SARS-Cov-2.	﻿Wen, Zeyu et al. 2020. “Cytoskeleton—a Crucial Key in Host Cell for Coronavirus Infection.” Journal of Molecular Cell Biology. https://academic.oup.com/jmcb/advance-article/doi/10.1093/jmcb/mjaa042/5876838 (November 16, 2020) ; ﻿Weaver, Beth A. 2014. “How Taxol/Paclitaxel Kills Cancer Cells” ed. William Bement. Molecular Biology of the Cell 25(18): 2677–81. https://www.molbiolcell.org/doi/10.109…	0.008192	0.002276	0.00493	0.000469	3.55549	0.696162	300	0	0.979696	0.007862	0.013615	0.011033	2.6509	0.576645	26	11	0.95244	0.029729
BRD-A69815203	cyclosporin-a	0	0	PMATZTZNYRCHOR-IMVLJIQESA-N	Peptidomimetics/Peptoid-peptide hybrids	Cyclosporin A (CsA) has immunosuppressive effects, for example it inhibits production of pro-inflammatory cytokines IFN-γ, IL-4, and IL-17. It has also been shown to inhibit replication of several coronaviruses (including SARS-CoV and MERS-CoV). Furthermore, CsA has been shown to activate the (IRF1-IFNλ) signalling pathway, and that this is essential to its antiviral action against MERS-CoV.	Molyvdas, Adam, and Sadis Matalon. 2020. “Cyclosporine: An Old Weapon in the Fight against Coronaviruses.” The European respiratory journal. http://www.ncbi.nlm.nih.gov/pubmed/32732332 (November 16, 2020).	0.00847	0	0.001408	0	4.30345	0.886117	304	0	0.993191	0.003113	0.050939	0.043192	1.65425	0.414952	25	10	0.860399	0.121466
DB00482	Celecoxib	0	0	RZEKVGVHFLEQIL-UHFFFAOYSA-N	Azoles/Pyrazoles	Anti-inflammatory: Celecoxib is a selective non-competitive inhibitor of COX-2, leading to the reduced synthesis of prostaglandin E2 (PGE2), prostacyclin (PGI2), thromboxane (TXA2), prostaglandin D2 (PGD2), and prostaglandin F2 (PGF2). As COX-2 is highly expressed in inflamed tissues and a key pathology of COVID-19 is a hyperinflammatory state, this provide therapeutic potential for Celecoxib.	Cohen, Brandon, and Charles V. Preuss. 2020. StatPearls Celecoxib. StatPearls Publishing. http://www.ncbi.nlm.nih.gov/pubmed/30570980 (November 16, 2020).	0.009037	0.001101	0.00892	0.000469	3.28664	0.417309	304	0	0.970078	0.004836	0.009155	0.002582	3.34801	0.542238	25	10	0.978973	0.011466
DB00806	Pentoxifylline	-1	0	BYPFEZZEUUWMEJ-UHFFFAOYSA-N	Imidazopyrimidines/Purines and purine derivatives	Antithrombotic: Pentoxifylline is an anti-TNFα, potentially therapeutic for the treatment of a cytokine storm in COVID-19 patients.	Iacobucci, Gareth. 2020. “Sixty Seconds on . . . the RECOVERY Trial.” BMJ: m1573. https://www.bmj.com/lookup/doi/10.1136/bmj.m1573 (November 16, 2020).	0.009471	0.002571	0.008685	0.000939	3.30104	0.385469	273	0	0.97069	0.003662	0.010329	0.007042	3.108	1.19601	25	10	0.972885	0.023669
DB00188	Bortezomib	0	1	GXJABQQUPOEUTA-RDJZCZTQSA-N	Carboxylic acids and derivatives/Amino acids, peptides, and analogues	Bortezomib is a reversible inhibitor of the 26S proteasome. Proteasome inhibitors may be therapeutic for COVID-19 patients as it has been shown that by inhibition of the ubiquitin-proteasome system (UPS) they can act to reduce the inflammatory response with mechanisms involving increased levels of the mitogen-activated protein kinase (MAPK) deactivator, mitogen-activated protein kinase phosphatas…	﻿Moutzouris, John P et al. 2010. “Proteasomal Inhibition Upregulates the Endogenous MAPK Deactivator MKP-1 in Human Airway Smooth Muscle: Mechanism of Action and Effect on Cytokine Secretion.” Biochimica et biophysica acta 1803(3): 416–23. http://www.ncbi.nlm.nih.gov/pubmed/20043958 (November 16, 2020) ; ﻿Raaben, Matthijs et al. 2010. “The Ubiquitin-Proteasome System Plays an Important Role durin…	0.009506	0.002717	0.002347	0.000235	4.10357	0.781352	300	0	0.990871	0.003642	0.038498	0.031455	2.08824	0.501589	26	11	0.893556	0.068645
DB00441	Gemcitabine	0	1	SDUQYLNIPVEERB-QPPQHZFASA-N	Pyrimidine nucleosides/Pyrimidine 2'-deoxyribonucleosides	This deoxycytidine analog has been shown to inhibit SARS-CoV-2 replication. It is hypothesised that this occurs through targeting targeting the pyrimidine biosynthesis salvage pathway and stimulation of the innate immune system.	﻿Zhang, Xin et al. 2020. “Low-Dose Gemcitabine Treatment Enhances Immunogenicity and Natural Killer Cell-Driven Tumor Immunity in Lung Cancer.” Frontiers in immunology 11: 331. http://www.ncbi.nlm.nih.gov/pubmed/32161598 (November 16, 2020) ; ﻿Zhang, Ya-Nan et al. 2020. “Gemcitabine, Lycorine and Oxysophoridine Inhibit Novel Coronavirus (SARS-CoV-2) in Cell Culture.” Emerging Microbes & Infection…	0.009868	0.0023	0.00446	0.000469	3.70621	0.7448	301	0	0.983687	0.006691	0.021831	0.011268	2.4132	0.707747	30	15	0.934167	0.04662
DB00403	Ceruletide	-1	0	YRALAIOMGQZKOW-HYAOXDFASA-N	Polypeptides/NA	Caerulein can induce severe acute pancreatitis, which is associated with upregulation of ACE2-Angiotensin (1-7)-Mas (ACE2-Ang1-7-Mas) axis and promotes levels of circulating Ang1-7. This may decrease pathological effects of reduced ACE2 availability/natural function due to SARS-CoV-2 spike protein binding.	﻿Sarzani, Riccardo et al. 2020. “Disequilibrium between the Classic Renin-Angiotensin System and Its Opposing Arm in SARS-CoV-2-Related Lung Injury.” American journal of physiology. Lung cellular and molecular physiology 319(2): L325–36. http://www.ncbi.nlm.nih.gov/pubmed/32639866 (November 16, 2020) ; ﻿Wang, Yan et al. 2012. “Severe Acute Pancreatitis Is Associated with Upregulation of the ACE2-…	0.009918	0.003149	0.027934	0.002817	2.40896	0.090241	228	0	0.898495	0.008642	0.003521	0.003521	4.1303	1.87151	25	10	0.989002	0.010915
DB00317	Gefitinib	-1	1	XGALLCVXEZPNRQ-UHFFFAOYSA-N	Diazanaphthalenes/Benzodiazines	Epidermal growth factor receptor (EGFR) inhibition by Gefitinib is suggested to reduce fibrotic lung injury during COVID-19 and has been shown to inhibit Transforming growth factor beta 1 (TGF-β1) induced fibrosis in vivo.	Weisberg, Ellen et al. 2020. “Repurposing of Kinase Inhibitors for Treatment of COVID-19.” Pharmaceutical research 37(9): 167. http://www.ncbi.nlm.nih.gov/pubmed/32778962 (November 16, 2020).	0.011418	0.003814	0.039671	0.010329	2.18528	0.345232	310	0	0.864099	0.02254	0.003286	0.001408	4.18448	0.888911	25	9	0.993954	0.004396
DB00675	Tamoxifen	-1	1	NKANXQFJJICGDU-QPLCGJKRSA-N	Stilbenes/NA	Tamoxifen reduces expression of prostaglandin E2 (PGE2) which has been shown to modulate Natural Killer (NK) cell activity and reduce viral replication.	﻿Almosawey et al. 2020. “Tamoxifen from Chemotherapy to Antiviral Drug: Possible Activity against COVID-19.” Biomedical and Biotechnology Research Journal (BBRJ) 4(2): 108. https://www.bmbtrj.org/article.asp?issn=2588-9834;year=2020;volume=4;issue=2;spage=108;epage=116;aulast=Almosawey (November 16, 2020) ; ﻿Sander, Willem J, Hester G O’Neill, and Carolina H Pohl. 2017. “Prostaglandin E2 As a Mod…	0.012107	0.00219	0.00446	0.000235	3.67433	0.637897	300	0	0.982913	0.005579	0.032864	0.020423	2.23495	0.415191	26	11	0.91152	0.048798
DB00678	Losartan	1	0	PSIFNNKUMBGKDQ-UHFFFAOYSA-N	Benzene and substituted derivatives/Biphenyls and derivatives	Ang II type 1 receptor (AT1R) antagonist, leads to upregulation of ACE2, which in SARS-CoV studies showed protection from SARS development.	Gurwitz, David. 2020. “Angiotensin Receptor Blockers as Tentative SARS‐CoV‐2 Therapeutics.” Drug Development Research 81(5): 537–40. https://onlinelibrary.wiley.com/doi/abs/10.1002/ddr.21656 (November 16, 2020).	0.012279	0.001803	0.005634	0.000235	3.52506	0.562664	300	0	0.978781	0.005776	0.026761	0.01385	2.06675	0.586359	25	10	0.90842	0.050966
DB06287	Temsirolimus	-1	1	CBPNZQVSJQDFBE-FUXHJELOSA-N	Phenylpropanoids and polyketides/Macrolide lactams	Temsirolimus is an inhibitor of mTOR and causes downstream reduction of hypoxia-inducible factor-1 (HIF-1) and HIF-2α, and the vascular endothelial growth factor (VEGF). Inhibition of mTOR is a suggested therapeutic mechanism for COVID-19. In addition, levels of HIF-1 and HIF-2 alpha are increased in patients, in this case Temsirolimus may counteract this change and downstream effects.	﻿Marchetti, Monia. 2020. “COVID-19-Driven Endothelial Damage: Complement, HIF-1, and ABL2 Are Potential Pathways of Damage and Targets for Cure.” Annals of hematology 99(8): 1701–7. http://www.ncbi.nlm.nih.gov/pubmed/32583086 (November 16, 2020) ; ﻿Zheng, Yunfeng, Renfeng Li, and Shunai Liu. 2020. “Immunoregulation with MTOR Inhibitors to Prevent COVID-19 Severity: A Novel Intervention Strategy b…	0.012687	0.003253	0.005399	0.000704	3.54544	0.635839	166	0	0.979398	0.007707	0.029812	0.015023	2.34649	0.732826	25	10	0.918852	0.053893
DB01248	Docetaxel	-1	1	ZDZOTLJHXYCWBA-VCVYQWHSSA-N	Prenol lipids/Diterpenoids	Docetaxel reversibly binds to the β-subunit of tubulin and hyper-stabilizes tubulin structures, preventing disassembly. Many stages of the SARS-CoV-2 lifecycle, including entry and replication have been shown to utilise the tubulin cytoskeleton, so docetaxel may inhibit these processes.	﻿Singh, Parminder, Krishnan Rathinasamy, Renu Mohan, and Dulal Panda. 2008. “Microtubule Assembly Dynamics: An Attractive Target for Anticancer Drugs.” IUBMB Life 60(6): 368–75. http://doi.wiley.com/10.1002/iub.42 (November 16, 2020) ; ﻿“The Interaction Between Cytoskeleton and Life Cycle of Coronavirus.” https://www.creative-diagnostics.com/blog/index.php/the-interaction-between-cytoskeleton-and…	0.01308	0.003377	0.016197	0.002113	2.8576	0.468205	305	0	0.945018	0.014555	0.010563	0.005399	3.1842	0.914527	25	10	0.975189	0.018057
DB00798	Gentamicin	-1	0	CEAZRRDELHUEMR-UHFFFAOYSA-N	Organooxygen compounds/Carbohydrates and carbohydrate conjugates	N/A	N/A	0.013473	0.001626	0.006338	0.000235	3.42764	0.510633	301	0	0.975573	0.005822	0.028638	0.011268	2.23158	0.375766	25	10	0.906346	0.038719
DB00755	Tretinoin	-1	1	SHGAZHPCJJPHSC-YCNIQYBTSA-N	N/A	Tretinoin (vitamin A derivative/retinoid) has two potential anti-SARS-CoV-2 activities. Firstly, vitamin A has immune-modulating properties, including the increase the activity of IFN-I, an important mediator of antiviral responses. Secondly, in silico studies have demonstrated that tretinoin can block and inhibit viroporins formed by SARS-CoV-2 envelope protein. This would potentially inhibit vi…	﻿Dey, Debajit, Subhomoi Borkotoky, and Manidipa Banerjee. 2020. “In Silico Identification of Tretinoin as a SARS-CoV-2 Envelope (E) Protein Ion Channel Inhibitor.” Computers in Biology and Medicine 127: 104063. https://www.sciencedirect.com/science/article/pii/S0010482520303942?via%3Dihub (November 16, 2020) ; ﻿Trasino, Steven E. 2020. “A Role for Retinoids in the Treatment of COVID‐19?” Clinical…	0.014546	0	0.003521	0	3.81218	0.622115	300	0	0.986021	0.004148	0.060094	0.05047	1.52359	0.628644	25	9	0.800634	0.149513
DB00993	Azathioprine	-1	0	LMEKQMALGUDUQG-UHFFFAOYSA-N	Thioethers/Aryl thioethers	Anti-inflammatory/negative: Azathioprine is immunosuppressant that works by inhibiting B and T cells. An in vivo experiment using azathioprine demonstrated delayed virus clearance, possibly due to immunosupressant activities of the drug.	﻿Park, Su-Jin et al. 2020. “Antiviral Efficacies of FDA-Approved Drugs against SARS-CoV-2 Infection in Ferrets.” mBio 11(3). http://www.ncbi.nlm.nih.gov/pubmed/32444382 (November 16, 2020) ; https://go.drugbank.com/drugs/DB00993	0.015931	0.001818	0.011502	0.000235	3.11639	0.312738	220	0	0.961836	0.002651	0.022066	0.014085	2.33142	0.672328	25	10	0.940314	0.039293
DB13390	Algeldrate	-1	0	SMYKVLBUSSNXMV-UHFFFAOYSA-K	Post-transition metal oxoanionic compounds/Post-transition metal hydroxides	N/A	N/A	0.01605	0.004811	0.012911	0.002347	3.02359	0.236547	214	0	0.956118	0.000348	0.019953	0.009859	2.35589	0.698171	25	10	0.940275	0.036705
DB01076	Atorvastatin	-1	0	XUKUURHRXDUEBC-KAYWLYCHSA-N	Pyrroles/Substituted pyrroles	Statins have pleiotropic effects on SARS-CoV-2 infection. Firstly, they raise high-density lipid (HDL) levels and reduce low-density lipid (LDL) levels. Low HDL levels have been associated with poor COVID-19 outcome. Furthermore, modulation of cholesterols by statins may disrupt levels and affect viral assembly, replication and infectivity of these enveloped virus particles. Finally, Atorvastatin…	﻿Moeller, Rebecca et al. “Effect of Statins on SARS-CoV-2 Infection.” https://doi.org/10.1101/2020.07.13.20152272 (November 16, 2020) ; ﻿Tikoo, Kulbhushan et al. 2015. “Tissue Specific up Regulation of ACE2 in Rabbit Model of Atherosclerosis by Atorvastatin: Role of Epigenetic Histone Modifications.” Biochemical Pharmacology 93(3): 343–51. https://www.sciencedirect.com/science/article/pii/S000629…	0.016219	0.003043	0.005164	0.000235	3.54943	0.427401	302	0	0.979517	0.002774	0.050939	0.039437	1.72292	0.460525	25	10	0.844138	0.111519
DB00480	Lenalidomide	-1	1	GOTYRUGSSMKFNF-UHFFFAOYSA-N	Isoindoles and derivatives/Isoindolines	Anti-inflammatory: Celecoxib is a selective non-competitive inhibitor of COX2, leading to the reduced synthesis PGE2, PGI2, TXA2, PGD2, and PGF2. As COX2 is highly expressed in inflamed tissues and a key pathology of COVID-19 is a hyperinflammatory state, this provides therapeutic potential for Celecoxib.	﻿Tailor, Imran K et al. 2020. “Outcome of Myeloma Patients with COVID-19 on Active Lenalidomide-Based Therapy: Does Lenalidomide Protect from Severe COVID-19?” Hematology/oncology and stem cell therapy. http://www.ncbi.nlm.nih.gov/pubmed/32950467 (November 16, 2020) ; ﻿Görgün, Güllü et al. 2010. “Immunomodulatory Effects of Lenalidomide and Pomalidomide on Interaction of Tumor and Bone Marrow Acc…	0.016432	0.002875	0.023474	0.001174	2.57127	0.144659	162	0	0.91839	0.000124	0.011502	0.007042	2.86902	0.95903	26	11	0.963401	0.027237
DB01073	Fludarabine	-1	0	HBUBKKRHXORPQB-FJFJXFQQSA-N	Nucleosides, nucleotides, and analogues/Purine nucleosides	Potential drug to inhibit SARS-CoV-2 helicase.	Ugurel, Osman Mutluhan et al. 2020. “Evaluation of the Potency of FDA-Approved Drugs on Wild Type and Mutant SARS-CoV-2 Helicase (Nsp13).” International journal of biological macromolecules 163: 1687–96. http://www.ncbi.nlm.nih.gov/pubmed/32980406 (November 16, 2020).	0.016529	0.004924	0.015728	0.002582	2.87243	0.174599	303	0	0.946146	0.001429	0.017371	0.00939	2.72901	0.56504	25	10	0.951269	0.027209
DB00169	Cholecalciferol	-1	0	QYSXJUFSXHHAJI-YRZJJWOYSA-N	Steroids and steroid derivatives/Vitamin D and derivatives	Cholecalciferol (Vitamin D3) is a physiologically form of vitamin D. Two main reported functions could be beneficial to COVID-19. Firstly, cholecalciferol reportedly reduces inflammation by regulating production of cytokines and inhibiting proliferation of proinflammatory cells. Secondly, it acts to promote expression of ACE2 gene - opposing changes induced by SARS-CoV-2. This occurs as vitamin D…	﻿Mitchell, Fiona. 2020. “Vitamin-D and COVID-19: Do Deficient Risk a Poorer Outcome?” The lancet. Diabetes & endocrinology 8(7): 570. http://www.ncbi.nlm.nih.gov/pubmed/32445630 (November 16, 2020) ; ﻿Malek Mahdavi, Aida. 2020. “A Brief Review of Interplay between Vitamin D and Angiotensin-Converting Enzyme 2: Implications for a Potential Treatment for COVID-19.” Reviews in medical virology 30(5)…	0.0167	0.003114	0.00493	0.000235	3.56281	0.513826	305	0	0.97991	0.004508	0.056573	0.041315	1.58072	0.400209	25	9	0.822453	0.115631
DB00974	Edetic Acid	-1	0	KCXVZYZYPLLWCC-UHFFFAOYSA-N	Carboxylic acids and derivatives/Tetracarboxylic acids and derivatives	EDTA is a potent Zinc (Zn) chelator, Zinc chelation has been shown to activate NFκB signalling, inducing upregulation of a subset of type I IFN-dependent antiviral response.	Kar, Meenakshi et al. 2019. “Zinc Chelation Specifically Inhibits Early Stages of Dengue Virus Replication by Activation of NF-ΚB and Induction of Antiviral Response in Epithelial Cells.” Frontiers in Immunology 10: 2347. https://www.frontiersin.org/article/10.3389/fimmu.2019.02347/full (November 16, 2020).	0.016813	0.0041	0.010563	0.001174	3.19511	0.501798	386	0	0.965888	0.0088	0.026761	0.014319	2.21432	0.584794	25	10	0.908511	0.054978
DB00531	Cyclophosphamide	-1	1	CMSMOCZEIVJLDB-UHFFFAOYSA-N	Organonitrogen compounds/Nitrogen mustard compounds	Immunomodulatory: Potential to deplete cytotoxic and effector T cell populations, leaving T regulatory/memory T cell populations remaining. Outcome of adjusting the balance from the proinflammatory state in COVID-19 patients.	﻿Ahlmann, Martina, and Georg Hempel. 2016. “The Effect of Cyclophosphamide on the Immune System: Implications for Clinical Cancer Therapy.” Cancer chemotherapy and pharmacology 78(4): 661–71. http://www.ncbi.nlm.nih.gov/pubmed/27646791 (November 16, 2020) ; ﻿Revannasiddaiah, Swaroop et al. 2020. “A Potential Role for Cyclophosphamide in the Mitigation of Acute Respiratory Distress Syndrome among …	0.016895	0.005575	0.006573	0.001408	3.39767	0.375664	303	0	0.974494	0.00254	0.043427	0.022066	2.10249	0.354853	25	10	0.886458	0.050659
DB00136	Calcitriol	-1	0	GMRQFYUYWCNGIN-NKMMMXOESA-N	Steroids and steroid derivatives/Vitamin D and derivatives	Calcitriol is an active metabolite of vitamin D - See Cholecalciferol.	N/A	0.018579	0.00574	0.004225	0.000469	3.71877	0.49036	300	0	0.983983	0.002875	0.08169	0.070188	1.34616	0.505584	26	10	0.726722	0.211694
DB01197	Captopril	-1	0	FAKRSMQSSFJEIM-RQJHMYQMSA-N	Carboxylic acids and derivatives/Amino acids, peptides, and analogues	This is a potent inhibitor of the ACE enzyme. The ACE enzyme has physiological effects that oppose the effects of ACE2. Therefore inhibition may compensate for reduced function of ACE2.	ClinicalTrials.gov. “Efficacy of Captopril in Covid-19 Patients With Severe Acute Respiratory Syndrome (SARS) CoV-2 Pneumonia (CAPTOCOVID) (CAPTOCOVID).” https://clinicaltrials.gov/ct2/show/NCT04355429 (November 16, 2020).	0.018718	0.004435	0.007981	0.001643	3.23734	0.457328	137	0	0.967887	0.004806	0.043897	0.011972	1.99111	0.405636	27	12	0.864473	0.054169
DB00530	Erlotinib	-1	1	AAKJLRGGTJKAMG-UHFFFAOYSA-N	Diazanaphthalenes/Benzodiazines	Erlotinib, a kinase inhibitor of adaptor-associated protein kinase 1 (AAK1) and G-associated kinase (GAK), is described as broad spectrum antiviral. AAK1 inhibition may inhibit endocytosis and therefore potentially SARS-CoV-2 entry.	﻿Magro, Giuseppe. 2020. “SARS-CoV-2 and COVID-19: What Are Our Options? Where Should We Focus Our Attention on to Find New Drugs and Strategies?” Travel medicine and infectious disease 37: 101685. http://www.ncbi.nlm.nih.gov/pubmed/32334088 (November 16, 2020) ; ﻿Weisberg, Ellen et al. 2020. “Repurposing of Kinase Inhibitors for Treatment of COVID-19.” Pharmaceutical Research 37(9): 167. http://l…	0.018869	0.003458	0.021362	0.001643	2.6441	0.306509	302	0	0.926109	0.009594	0.016667	0.007277	2.90694	0.502527	36	21	0.95466	0.026661
DB00271	Diatrizoate	-1	0	YVPYQUNUQOZFHG-UHFFFAOYSA-N	Benzene and substituted derivatives/Benzoic acids and derivatives	N/A	N/A	0.019379	0.005575	0.006808	0.000939	3.39015	0.422964	287	0	0.974216	0.003953	0.055164	0.033099	1.79506	0.401822	25	9	0.834685	0.101231
DB02546	Vorinostat	-1	1	WAEXFXRVDQXREF-UHFFFAOYSA-N	Benzene and substituted derivatives/NA	Histone deacetylase (HDAC) inhibitor. Intracellular viral SARS-CoV-2 components have also been indicated as interacting with HDAC, inhibitors may disrupt this interaction and therefore disrupt viral life cycle.	Harrison, Charlotte. “Drug Researchers Pursue New Lines of Attack against COVID-19.” https://www.nature.com/articles/d41587-020-00013-z (November 16, 2020).	0.019745	0.005196	0.005869	0.000469	3.5004	0.606612	493	0	0.97801	0.007004	0.066432	0.057512	1.3585	0.431796	25	10	0.788187	0.182402
DB00331	Metformin	-1	0	XZWYZXLIPXDOLR-UHFFFAOYSA-N	Organonitrogen compounds/Guanidines	Originally introduced as anti-influenza drug, metformin activates 5' AMP-activated protein kinase (AMPK), which then phosphorylates ACE2. This causes conformation and functional changes to ACE2 that could inhibit SARS-CoV-2 binding and/or entry.	Sharma, Swati, Avik Ray, and Balakrishnan Sadasivam. 2020. “Metformin in COVID-19: A Possible Role beyond Diabetes.” Diabetes research and clinical practice 164: 108183. http://www.ncbi.nlm.nih.gov/pubmed/32360697 (November 16, 2020).	0.020226	0	0.007512	0	3.35393	0.368291	352	0	0.972836	0.002654	0.05446	0.024174	1.86948	0.2404	25	10	0.849588	0.053423
DB00244	Mesalazine	-1	0	KBOPZPXVLCULAV-UHFFFAOYSA-N	Benzene and substituted derivatives/Benzoic acids and derivatives	Anti-inflammatory roles with the potential to inhibit the activation of NFκB and reduce the production of further inflammatory cytokines.	Bantel, H et al. 2000. “Mesalazine Inhibits Activation of Transcription Factor NF-KappaB in Inflamed Mucosa of Patients with Ulcerative Colitis.” The American journal of gastroenterology 95(12): 3452–57. http://www.ncbi.nlm.nih.gov/pubmed/11151876 (November 16, 2020).	0.020302	0.001992	0.051643	0.000704	1.9698	0.086724	182	0	0.819811	0.002349	0.007981	0.005634	3.29953	1.31661	29	11	0.9786	0.018876
DB00959	Methylprednisolone	1	1	VHRSUDSXCMQTMA-PJHHCJLFSA-N	Steroids and steroid derivatives/Hydroxysteroids	Methylprednisolone binds to and activates specific nuclear receptors, resulting in altered gene expression and inhibition of proinflammatory cytokine production.	National Center for Biotechnology Information. "PubChem Compound Summary for CID 6741, Methylprednisolone" PubChem, https://pubchem.ncbi.nlm.nih.gov/compound/Methylprednisolone. Accessed 16 November, 2020.	0.02032	0.001788	0.01385	0.000235	2.98173	0.311566	221	0	0.953814	0.004082	0.029812	0.013615	2.2294	0.498725	25	10	0.91791	0.038112
DB01234	Dexamethasone	1	1	UREBDLICKHMUKA-CXSFZGCWSA-N	Steroids and steroid derivatives/Hydroxysteroids	Corticosteroid which decreases leukocyte migration to sites of inflammation and binds to the glucocorticoid receptor, mediating changes in gene expression.	https://www.drugbank.ca/drugs/DB01234	0.020934	0.010602	0.007746	0.002817	3.35224	0.861478	331	0	0.972769	0.014166	0.056573	0.039906	1.57377	0.507902	26	2	0.805825	0.135005
DB00305	Mitomycin	-1	1	NWIBSHFKIJFRCO-WUDYKRTCSA-N	Indoles and derivatives/Indolequinones	N/A	N/A	0.022257	0.00552	0.014554	0.001643	2.92695	0.473976	310	0	0.95011	0.013096	0.034038	0.018545	1.84688	0.638431	26	11	0.884271	0.077796
DB01132	Pioglitazone	-1	0	HYAFETHFCAUJAY-UHFFFAOYSA-N	Phenol ethers/NA	Agonist of peroxisome proliferator-activated receptor gamma (PPARγ). PPARγ, in addition to roles of glucose and lipid metabolism, represses inflammatory processes - making it a candidate for cytokine storm modulation in COVID-19.	﻿Orasanu, Gabriela et al. 2008. “The Peroxisome Proliferator-Activated Receptor-γ Agonist Pioglitazone Represses Inflammation in a Peroxisome Proliferator-Activated Receptor-α–Dependent Manner In Vitro and In Vivo in Mice.” Journal of the American College of Cardiology 52(10): 869–81. https://www.sciencedirect.com/science/article/pii/S0735109708019827?via%3Dihub (November 16, 2020) ; ﻿Ciavarella,…	0.022664	0.003829	0.0277	0.001643	2.3218	0.091024	330	0	0.889016	0.009998	0.018545	0.00892	2.56034	0.660998	25	10	0.939281	0.038858
DB00218	Moxifloxacin	-1	0	FABPRXSRWADJSP-MEDUHNTESA-N	Quinolines and derivatives/Quinoline carboxylic acids	Topoisomerase inhibitor (II and IV), in silico studies showing the docking of moxifloxacin to SARS-CoV-2 Mpro (3CLpro) active site. Therefore moxifloxacin has potential to inhibit viral replication.	Marciniec, Krzysztof et al. 2020. “Ciprofloxacin and Moxifloxacin Could Interact with SARS-CoV-2 Protease: Preliminary in Silico Analysis.” Pharmacological reports : PR: 1. http://www.ncbi.nlm.nih.gov/pubmed/33063271 (November 16, 2020).	0.023017	0.002656	0.05939	0.001878	1.845	0.110178	82	0	0.793549	0.00999	0.00892	0.003756	3.3603	0.788147	33	18	0.979308	0.01473
DB00694	Daunorubicin	-1	1	STQGQHZAVUOBTE-VGBVRHCVSA-N	Anthracyclines/NA	N/A	N/A	0.023881	0.00397	0.032394	0.002582	2.36721	0.098498	303	0	0.885498	0.007224	0.017606	0.006103	2.73938	0.642425	26	9	0.954321	0.025825
DB11255	Chromium picolinate	-1	0	CBDQOLKNTOMMTL-UHFFFAOYSA-K	Pyridines and derivatives/Pyridinecarboxylic acids and derivatives	Promotes translocation of glucose transporter type 4 (GLUT4) to cellular membranes. As loss of ACE2 (which occurs in COVID-19 patients) causes reduction of GLUT4, then it is possible chromium picolinate can oppose this change in COVID-19 patients.	Hua, Yinan, Suzanne Clark, Jun Ren, and Nair Sreejayan. 2012. “Molecular Mechanisms of Chromium in Alleviating Insulin Resistance.” The Journal of nutritional biochemistry 23(4): 313–19. http://www.ncbi.nlm.nih.gov/pubmed/22423897 (November 16, 2020).	0.024198	0.004528	0.015493	0.000704	2.87932	0.336371	304	0	0.946663	0.006958	0.037793	0.029108	2.06326	0.633499	25	10	0.895494	0.076534
DB00720	Clodronic Acid	-1	0	ACSIXWWBWUQEHA-UHFFFAOYSA-N	Organic phosphonic acids and derivatives/Bisphosphonates	(Published in transcriptome SARS-CoV-2 studies as a suggested drug, no mechanism suggested)	Loganathan, Tamizhini et al. “Host Transcriptome-Guided Drug Repurposing for COVID-19 Treatment: A Meta-Analysis Based Approach.” https://www.omicsdi.org/ (November 16, 2020).	0.02453	0.005721	0.014085	0.001408	2.92974	0.274646	137	0	0.950305	0.004042	0.042723	0.023239	1.96962	0.468266	27	12	0.879193	0.067174
DB00481	Raloxifene	0	1	GZUITABIAKMVPG-UHFFFAOYSA-N	Organooxygen compounds/Carbonyl compounds	Raloxifene can bind complement factor C5a, changing its conformation and preventing its binding to C5a receptor and modulate the cytokine storm occurring in COVID-19 patients. Raloxifene has also been tested in vitro and in vivo and found to have effective antiviral action in vitro. Additional possible antiviral mechanisms may relate to Raloxifene's action as a pore-blocker, and the role that two…	﻿Penny, Christopher J et al. 2019. “Mining of Ebola Virus Entry Inhibitors Identifies Approved Drugs as Two-Pore Channel Pore Blockers.” Biochimica et biophysica acta. Molecular cell research 1866(7): 1151–61. http://www.ncbi.nlm.nih.gov/pubmed/30408544 (November 16, 2020) ; ﻿Gil, Carmen et al. 2020. “COVID-19: Drug Targets and Potential Treatments.” Journal of Medicinal Chemistry 63(21): 12359–8…	0.024949	0.009448	0.007512	0.001408	3.48611	0.350864	489	0	0.977551	0.001272	0.082864	0.06338	1.26053	0.443151	28	8	0.738758	0.186026
DB00619	Imatinib	0	1	KTUFNOKKBVMGRW-UHFFFAOYSA-N	Benzene and substituted derivatives/Anilides	By inhibition of ABL2 kinase, Imatinib can disrupt interactions which SARS-CoV-2 has been predicted to have with this kinase during virus entry.	Morales-Ortega, Alejandro et al. 2020. “Imatinib for COVID-19: A Case Report.” Clinical immunology (Orlando, Fla.) 218: 108518. http://www.ncbi.nlm.nih.gov/pubmed/32599278 (November 16, 2020).	0.024949	0.012911	0.007512	0.002582	3.37568	0.834328	302	0	0.973673	0.0132	0.082864	0.064554	1.14062	0.523013	25	9	0.755376	0.191116
BRD-K00259736	colchicine	0	0	IAKHMKGGTNLKSZ-INIZCTEOSA-N	Tropones/NA	Broad anti-inflammatory and immunomodulatory effects including inhibition of NLR Family Pyrin Domain Containing 3 (NLRP3) inflammasome assembly by microtubule disruption. NLRP3 has been reported to be activated by SARS-COV-1 E protein.	Assessment of Evidence for COVID-19-Related Treatments: Updated 11/12/2020. http://www.safemedication.com/. (November 16, 2020).	0.025049	0.002717	0.01385	0.000469	2.96075	0.391385	303	0	0.952427	0.008456	0.045305	0.015728	1.99309	0.323197	32	17	0.862814	0.048307
DB00635	Prednisone	-1	1	XOFYZVNMUHMLCC-ZPOLXVRWSA-N	Steroids and steroid derivatives/Hydroxysteroids	Prednisone is a Glucocorticoid. These compounds inhibit NFκB and other inflammatory transcription factors, therefore may aid the hyperimmune activation in COVID-19 patients.	﻿Puckett, Yana, Aishah Gabbar, and Abdullah A. Bokhari. 2020. StatPearls Prednisone. StatPearls Publishing. http://www.ncbi.nlm.nih.gov/pubmed/30521230 (November 16, 2020).	0.025374	0.004552	0.010798	0.000469	3.19172	0.244203	306	0	0.964789	0.000933	0.059624	0.044131	1.64143	0.517548	25	10	0.807264	0.127878
DB09526	Hydroquinone	-1	0	QIGBRXMKCJKVMJ-UHFFFAOYSA-N	Phenols/Benzenediols	N/A	N/A	0.025683	0.003253	0.026761	0.000704	2.46128	0.159801	341	0	0.90449	0.000848	0.024648	0.015023	2.75899	0.863194	32	0	0.953272	0.033668
DB01053	Benzylpenicillin	-1	0	JGSARLDLIJGVTE-MBNYWOFBSA-N	Carboxylic acids and derivatives/Amino acids, peptides, and analogues	N/A	N/A	0.026662	0.009544	0.040376	0.006808	2.17286	0.260612	279	0	0.861927	0.01924	0.017606	0.01338	2.9318	1.09181	25	9	0.958057	0.036887
DB00605	Sulindac	-1	0	MLKXDPUZXIRXEP-MFOYZWKCSA-N	Indenes and isoindenes/NA	In addition to anti-inflammatory action arising from COX-1/-2 inhibition, sulindac has been described to suppress expression of CD147. CD147 has been described as a receptor for SARS-CoV-2 in addition to ACE2.	﻿Saheb Sharif‐Askari, Narjes et al. 2020. “Effect of Common Medications on the Expression of SARS‐CoV‐2 Entry Receptors in Kidney Tissue.” Clinical and Translational Science: cts.12862. https://onlinelibrary.wiley.com/doi/abs/10.1111/cts.12862 (November 16, 2020) ; ﻿Ulrich, Henning, and Micheli M Pillat. 2020. “CD147 as a Target for COVID-19 Treatment: Suggested Effects of Azithromycin and Stem C…	0.026682	0.002697	0.0223	0.000704	2.6312	0.178806	330	0	0.923753	0.00104	0.031925	0.010329	2.35811	0.241791	25	8	0.917489	0.030863
DB00398	Sorafenib	-1	1	MLDQJTXFUGDVEO-UHFFFAOYSA-N	Organooxygen compounds/Ethers	Sorafenib inhibits Raf/Mek/MAPK pathways. By inhibiting this signalling downstream of growth-factor receptors, which have been shown to be activated during infection, sorafenib is predicted to be anti-SARS-CoV-2.	﻿Tesarik, Jan. 2020. “Melatonin Attenuates Growth Factor Receptor Signaling Required for SARS-CoV-2 Replication.” Melatonin Research 3(4): 534–37. http://www.melatonin-research.net/index.php/MR/article/view/116 (November 16, 2020) ; ﻿Klann, Kevin et al. 2020. “Growth Factor Receptor Signaling Inhibition Prevents SARS-CoV-2 Replication.” Molecular cell 80(1): 164-174.e4. http://www.ncbi.nlm.nih.go…	0.026804	0.012384	0.012441	0.005399	3.0597	0.83272	301	0	0.958636	0.021635	0.057746	0.028404	1.75339	0.40696	25	10	0.820389	0.082993
DB00163	Vitamin E	-1	0	GVJHHUAWPYXKBD-IEOSBIPESA-N	Prenol lipids/Quinone and hydroquinone lipids	Vitamin E enhances the immune response through the following mechanisms: downregulation of prostaglandin E2 and inhibition of COX-2 which decreases NO production, initiation of T-lymphocytes and modulation of the Th1/Th2 balance. In addition, inhibition of protein kinase C by vitamin E affects monocyte and macrophage proliferation and reduces superoxide free radical production from macrophages an…	Zhang, Lei, and Yunhui Liu. 2020. “Potential Interventions for Novel Coronavirus in China: A Systematic Review.” Journal of Medical Virology 92(5): 479–90. https://onlinelibrary.wiley.com/doi/abs/10.1002/jmv.25707 (November 16, 2020).	0.0271	0.002239	0.013146	0.000235	3.02097	0.322719	311	0	0.956304	0.004164	0.055869	0.021362	1.84937	0.310481	26	11	0.844017	0.05497
DB00681	Amphotericin B	-1	0	APKFDSVGJQXUKY-INPOYWNPSA-N	Organooxygen compounds/Carbohydrates and carbohydrate conjugates	Amphotericin B (AmB) has potent immunomodulatory roles by enhancing the immune response. AmB increases the production of pro-inflammatory cytokines via interference with macrophage activation state. AmB increases TNFα production, leading to the production of superoxide dismutase, this scavenger has potential to decrease oxidative stress in COVID-19 patients. AmB may also directly affect SARS-CoV-…	﻿Clayette, P et al. 2000. “Effects of MS-8209, an Amphotericin B Derivative, on Tumor Necrosis Factor Alpha Synthesis and Human Immunodeficiency Virus Replication in Macrophages.” Antimicrobial agents and chemotherapy 44(2): 405–7. http://www.ncbi.nlm.nih.gov/pubmed/10639370 (November 16, 2020) ; ﻿Al-Khikani, Falah Hasan Obayes. 2020. “Amphotericin B as Antiviral Drug: Possible Efficacy against C…	0.027426	0.003219	0.015258	0.000469	2.92144	0.347641	309	0	0.949722	0.006882	0.049296	0.022066	1.78403	0.307443	25	10	0.845087	0.061417
DB00597	Gadoteridol	-1	0	DPNNNPAKRZOSMO-UHFFFAOYSA-K	Carboxylic acids and derivatives/Amino acids, peptides, and analogues	N/A	N/A	0.027727	0.008739	0.015023	0.002582	2.88666	0.155659	306	0	0.944857	0.002352	0.051174	0.029577	1.72714	0.477912	29	14	0.838523	0.09014
DB00603	Medroxyprogesterone acetate	-1	1	PSGAAPLEWMOORI-PEINSRQWSA-N	Steroids and steroid derivatives/Pregnane steroids	Medroxyprogesterone acetate (MPA) is a testosterone suppressing agent. Other than via ACE2 receptors, entry of SARS-CoV-2 into epithelial lung cell can also occur by the TMPRSS2 enzyme, which is encoded by an androgen response gene. Activation of androgen receptors by testosterone can lead to TMPRSS2 expression. Therefore, suppression of testosterone by MPA may reduce expression of TMPRSS2 and su…	﻿Grubić Kezele, Tanja. 2020. “Androgen-Driven COVID-19 Infection – Is Testosterone an Enemy or a Friend?” Hormone Molecular Biology and Clinical Investigation 41(2). https://www.degruyter.com/view/journals/hmbci/41/2/article-20200027.xml (November 16, 2020).	0.028251	0.004166	0.015962	0.000704	2.81639	0.051503	426	0	0.929739	0.016064	0.05	0.024648	1.67603	0.384947	29	14	0.834384	0.07743
DB04951	Pirfenidone	0	0	ISWRGOKTTBVCFA-UHFFFAOYSA-N	Pyridines and derivatives/Hydropyridines	Anti-inflammatory and antifibrotic effects. Antifibrotic mechanism of pirfenidone is associated with the inhibition of both production and activity of TGF-β.	Cho, Monique E, and Jeffrey B Kopp. 2010. “Pirfenidone: An Anti-Fibrotic Therapy for Progressive Kidney Disease.” Expert opinion on investigational drugs 19(2): 275–83. http://www.ncbi.nlm.nih.gov/pubmed/20050822 (November 16, 2020).	0.029108	0.009681	0.029108	0.006338	2.39216	0.210612	75	0	0.896206	0.004089	0.029108	0.014789	2.45647	0.714071	25	10	0.918815	0.050136
DB06196	Icatibant	-1	0	QURWXBZNHXJZBE-MCDGZUPGSA-N	N/A	SARS-CoV-2 infection leads to decrease of ACE2 function, which leads to increased activation of the plasma kallikrein-kinin system, followed by increase bradykinin formation and stimulation of associated receptors (bradykinin 2), leading to pulmonary pathogenesis. As icatibant is an antagonist of bradykinin B2 receptors, this compound could reduce this effect of COVID-19.	van de Veerdonk, Frank L. et al. 2020. “Outcomes Associated With Use of a Kinin B2 Receptor Antagonist Among Patients With COVID-19.” JAMA Network Open 3(8): e2017708. https://jamanetwork.com/journals/jamanetworkopen/fullarticle/2769237 (November 16, 2020).	0.029721	0.005764	0.016432	0.002113	2.8573	0.282272	94	0	0.944994	0.002755	0.053756	0.015728	1.76211	0.370386	33	18	0.841437	0.05407
DB04942	Tamibarotene	0	1	MUTNCGKQJGXKEM-UHFFFAOYSA-N	Tetralins/NA	Tamibarotene, a synthetic retinoid, is a retinoid acid receptors (RXR) agonist. Activation of RXRs, either by endogenous substrates or agonists such as this, may improve immune response and decrease inflammatory disease.	Sarohan, Aziz Rodan. 2020. “COVID-19: Endogenous Retinoic Acid Theory and Retinoic Acid Depletion Syndrome.” Medical Hypotheses 144: 110250. https://linkinghub.elsevier.com/retrieve/pii/S0306987720317898 (November 16, 2020).	0.030534	0.008908	0.022066	0.002113	2.5851	0.125978	467	0	0.905298	0.027311	0.042254	0.037559	1.75646	0.692495	28	13	0.877581	0.090661
DB01590	Everolimus	0	1	HKVAMNSJSFKALM-GKUWKFKPSA-N	Macrolide lactams/NA	Hypothesised immunosuppressant benefit from mTOR complex 1 (mTORC1) inhibition by everolimus. Specifically mTORC1 inhibition can reduce T lymphocyte proliferation, dampening the cytokine storm of COVID-19, in addition to preserving T regulatory cell growth and activity.	Terrazzano, Giuseppe et al. 2020. “An Open Question: Is It Rational to Inhibit the MTor-Dependent Pathway as COVID-19 Therapy?” Frontiers in Pharmacology 11: 856. https://www.frontiersin.org/article/10.3389/fphar.2020.00856/full (November 16, 2020).	0.030579	0.003783	0.016667	0.000704	2.84933	0.411003	270	0	0.944378	0.01175	0.056103	0.020319	1.81249	0.339938	25	10	0.831965	0.050871
DB00316	Acetaminophen	-1	0	RZVAJINKPMORJF-UHFFFAOYSA-N	Phenols/1-hydroxy-2-unsubstituted benzenoids	N/A	N/A	0.030664	0.004902	0.012676	0.000469	3.06742	0.340772	301	0	0.959087	0.004453	0.074178	0.051174	1.55607	0.483584	25	10	0.795162	0.119396
DB00853	Temozolomide	-1	1	BPEGJWRSRHCHSN-UHFFFAOYSA-N	Imidazotetrazines/NA	N/A	N/A	0.031349	0.010262	0.020423	0.003052	2.7005	0.378642	300	0	0.931618	0.013461	0.048122	0.034507	1.38393	0.464131	33	18	0.844928	0.118635
DB01259	Lapatinib	0	1	BCFGMOOMADDAQU-UHFFFAOYSA-N	Diazanaphthalenes/Benzodiazines	Lapatinib is human epidermal growth factor receptor type 2 (HER2/ERBB2) and epidermal growth factor receptor (HER1/EGFR/ERBB1) tyrosine kinases inhibitor. Inhibition of EGFR indicates potential mechanism to reduce pulmonary fibrosis in COVID-19 patients as excessive levels of TGF-β induce expression of EGFR ligands and activation of EGFR which contribute to lung fibrosis.	﻿Delpino, M. Victoria, and Jorge Quarleri. 2020. “SARS-CoV-2 Pathogenesis: Imbalance in the Renin-Angiotensin System Favors Lung Fibrosis.” Frontiers in Cellular and Infection Microbiology 10: 340. https://www.frontiersin.org/article/10.3389/fcimb.2020.00340/full (November 16, 2020) ; ﻿Weisberg, Ellen et al. 2020. “Repurposing of Kinase Inhibitors for Treatment of COVID-19.” Pharmaceutical resear…	0.031979	0.00946	0.065023	0.006808	1.85207	0.002281	300	0	0.776516	0.019291	0.015728	0.013146	2.96712	1.10527	25	6	0.965919	0.031189
DB00586	Diclofenac	-1	0	DCOPUUMXTXDBNB-UHFFFAOYSA-N	Benzene and substituted derivatives/Halobenzenes	Anti-inflammatory properties, including non-selective COX inhibition that can reduce hyperinflammatory state in COVID-19 patients. In addition, diclofenac has previously been associated with the expression of TMPRSS2 - an entry receptor for SARS-CoV-2.	Saheb Sharif‐Askari, Narjes et al. 2020. “Effect of Common Medications on the Expression of SARS‐CoV‐2 Entry Receptors in Kidney Tissue.” Clinical and Translational Science: cts.12862. https://onlinelibrary.wiley.com/doi/abs/10.1111/cts.12862 (November 16, 2020).	0.0321	0.006255	0.025822	0.002347	2.47068	0.098181	265	0	0.898482	0.008041	0.039906	0.016667	1.86404	0.576561	30	15	0.868789	0.061216
DB00262	Carmustine	-1	1	DLGOEMSEDOSKAD-UHFFFAOYSA-N	Organic carbonic acids and derivatives/Ureas	Potentially negative: Carmustine inhibits glutathione reductase, leading to decreased levels of glutathione. This could have negative effects as glutathione has been indicated to have protective effects against severe inflammatory responses in COVID-19. This is through mechanisms where glutathione acting as key antioxidant throughout the body.	﻿Silvagno, Francesca, Annamaria Vernone, and Gian Piero Pescarmona. 2020. “The Role of Glutathione in Protecting against the Severe Inflammatory Response Triggered by COVID-19.” Antioxidants (Basel, Switzerland) 9(7). http://www.ncbi.nlm.nih.gov/pubmed/32708578 (November 16, 2020) ; ﻿An, Jeong Mi et al. 2011. “Carmustine Induces ERK- and JNK-Dependent Cell Death of Neuronally-Differentiated PC12 …	0.032649	0.010821	0.021831	0.003991	2.75992	0.078515	460	0	0.926323	0.010686	0.048826	0.029343	2.00098	0.51042	36	21	0.869303	0.063011
DB00783	Estradiol	-1	1	VOXZDWNPVJITMN-ZBRFXRBCSA-N	Lipids and lipid-like molecules/Steroids and steroid derivatives	Therapeutic mechanisms may include estradiol's roles in: increasing T regulatory cell population, protective effect on endothelial functions, attenuation of vasoconstriction and induction of vasodilation in pulmonary vasculature. The latter function may counteract vasoconstriction which occurs due to imbalance of regular ACE2 function in COVID-19 patients due to occupation of ACE2 receptors by vi…	﻿Seltzer, S. 2020. “Linking ACE2 and Angiotensin II to Pulmonary Immunovascular Dysregulation in SARS-CoV-2 Infection.” International Journal of Infectious Diseases 101: 42–45. https://www.sciencedirect.com/science/article/pii/S1201971220307578 (November 16, 2020) ; ﻿Breithaupt-Faloppa, Ana Cristina et al. 2020. “17β-Estradiol, a Potential Ally to Alleviate SARS-CoV-2 Infection.” Clinics (Sao Pau…	0.032714	0.004525	0.011268	0.000235	3.12733	0.306331	300	0	0.962426	0.002263	0.094979	0.087232	1.12799	0.477271	25	9	0.698474	0.23555
DB00388	Phenylephrine	-1	0	SONNWYBIRXJNDC-VIFPVBQESA-N	Phenols/1-hydroxy-4-unsubstituted benzenoids	Potentially negative: Phenylephrine is an agonist of α1-adrenoceptors. This highlights a potentially negative effect in COVID-19 patients, as this could be be additional to existing pulmonary hyper-vasoconstriction in COVID-19 patients.	﻿Gubbi, Sriram et al. 2020. “Catecholamine Physiology and Its Implications in Patients with COVID-19.” The lancet. Diabetes & endocrinology 0(0). http://www.ncbi.nlm.nih.gov/pubmed/33128872 (November 16, 2020) ; ﻿Konig, Maximilian F. et al. 2020. “Preventing Cytokine Storm Syndrome in COVID-19 Using α-1 Adrenergic Receptor Antagonists.” The Journal of Clinical Investigation 130(7): 3345–47. https…	0.033069	0.003114	0.019014	0.000469	2.72903	0.254677	305	0	0.934258	0.003993	0.057512	0.020657	1.8567	0.348999	25	9	0.835244	0.047762
DB00860	Prednisolone	-1	1	OIGNJSKKLXVSLS-VWUMJDOOSA-N	Steroids and steroid derivatives/Hydroxysteroids	Prednisolone, a glucocorticoid steroid, has anti-inflammatory and immunosuppressive properties through inhibition of phospholipase A2, inhibition of NFκB and other inflammatory transcription factors and promoting anti-inflammatory cytokines including IL-10. Thus, prednisolone has potential to attenuate hyperinflammatory state in COVID-19 patients.	Imperial College Healthcare NHS Trust. “Steroid Found to Improve Survival of Critically Ill Covid-19 Patients.” https://www.imperial.nhs.uk/about-us/news/steroid-found-to-improve-survival-of-critically-ill-covid-19-patients (November 16, 2020).	0.033214	0.00498	0.030516	0.002113	2.35831	0.10249	300	0	0.884848	0.006607	0.03615	0.011737	2.25224	0.464514	25	6	0.893631	0.049051
DB00741	Hydrocortisone	-1	1	JYGXADMDTFJGBT-VWUMJDOOSA-N	Steroids and steroid derivatives/Hydroxysteroids	Hydrocortisone, a glucocorticoid steroid, has anti-inflammatory effect which could suppress the pathogenic hyperinflammatory state in COVID-19 patients. Mechanisms of this includes inhibition of phospholipase A2, inhibition of NFκB and other inflammatory transcription factors and promoting anti-inflammatory agents including IL-10.	Imperial College Healthcare NHS Trust. “Steroid Found to Improve Survival of Critically Ill Covid-19 Patients.” https://www.imperial.nhs.uk/about-us/news/steroid-found-to-improve-survival-of-critically-ill-covid-19-patients (November 16, 2020).	0.033651	0.00345	0.017606	0.000469	2.77064	0.100977	304	0	0.929222	0.008717	0.064319	0.025352	1.62326	0.321619	25	9	0.799821	0.077349
DB00938	Salmeterol	-1	0	GIIZNNXWQWCKIB-UHFFFAOYSA-N	Benzene and substituted derivatives/Benzyl alcohols	An agonist of β2-adrenoceptor; stimulation of this receptor causes relaxation of bronchial smooth muscle, bronchodilation, and increased airflow. However, Salmeterol has been shown to stimulate release of IL-6 and IL-8 in airway epithelial cells - a potentially negative mechanism. In contrast, salmeterol has also been shown to inhibit TNF-α release from monocyte derived macrophages, which is a su…	﻿Donnelly, L E, S J Tudhope, P S Fenwick, and P J Barnes. 2010. “Effects of Formoterol and Salmeterol on Cytokine Release from Monocyte-Derived Macrophages.” The European respiratory journal 36(1): 178–86. http://www.ncbi.nlm.nih.gov/pubmed/7995399 (November 16, 2020) ; ﻿Strandberg, Karin, Lena Palmberg, and Kjell Larsson. 2007. “Effect of Formoterol and Salmeterol on IL-6 and IL-8 Release in Air…	0.033805	0.00642	0.052347	0.002582	1.95817	0.019545	229	0	0.819631	0.011481	0.021831	0.015962	2.73495	1.14427	25	10	0.934674	0.055491
BRD-K31283835	Tofacitinib	0	0	UJLAWZDWDVHWOW-YPMHNXCESA-N	Piperidines/N-acylpiperidines	Tofacitinib is a janus kinase (JAK) inhibitor with immunosuppressant activity that suppresses pro-inflammatory signaling (such as IL-6 ) important to progression to severe respiratory symptoms of COVID-19.	Seif, Farhad et al. 2020. “JAK Inhibition as a New Treatment Strategy for Patients with COVID-19.” International Archives of Allergy and Immunology 181(6): 467–75. http://www.ncbi.nlm.nih.gov/pubmed/32392562 (November 16, 2020).	0.033942	0.012258	0.023709	0.006338	2.56378	0.527042	183	0	0.917556	0.028308	0.048592	0.023709	1.87453	0.602453	26	11	0.854079	0.084698
DB01221	Ketamine	-1	0	YQEZLKZALYSWHR-UHFFFAOYSA-N	Benzene and substituted derivatives/Halobenzenes	Potentially effective due to action at low doses in reducing pro-inflammatory cytokines, especially IL-6 and TNFα.	ClinicalTrials.gov. “Study of Immunomodulation Using Naltrexone and Ketamine for COVID-19.” https://clinicaltrials.gov/ct2/show/NCT04365985 (November 16, 2020).	0.034672	0.002484	0.016901	0.000235	2.82491	0.281298	303	0	0.94245	0.004432	0.071127	0.026291	1.51693	0.310129	25	10	0.779437	0.077345
DB00790	Perindopril	-1	0	IPVQLZZIHOAWMC-QXKUPLGCSA-N	Carboxylic acids and derivatives/Amino acids, peptides, and analogues	ACE inhibitor which may block viral entry.	Poduri, Ramarao, Gaurav Joshi, and Gowraganahalli Jagadeesh. 2020. “Drugs Targeting Various Stages of the SARS-CoV-2 Life Cycle: Exploring Promising Drugs for the Treatment of Covid-19.” Cellular Signalling 74: 109721. https://www.sciencedirect.com/science/article/pii/S0898656820301984?casa_token=9yr1kfd0IKgAAAAA:Yf_zyOJXBUZanPTgwWRPtfHshcH2_4G9LEu-Yg3agLRtN8w3tLqO4-s8ZaNPBB7edCLAUqQwqQ (November…	0.034843	0.003879	0.033803	0.000704	2.28617	0.158453	235	0	0.880691	0.00199	0.035915	0.021362	1.77651	0.782756	120	104	0.872149	0.088207
DB00762	Irinotecan	-1	1	UWKQSNNFCGGAFS-XIFFEERXSA-N	Camptothecins/NA	A TOP1 inhibitor that can suppress the overstimulated innate immune response triggered by COVID-19.	Lovetrue, Bragi. 2020. “The AI-Discovered Aetiology of COVID-19 and Rationale of the Irinotecan+ Etoposide Combination Therapy for Critically Ill COVID-19 Patients.” Medical Hypotheses 144: 110180. https://linkinghub.elsevier.com/retrieve/pii/S0306987720325408 (November 16, 2020).	0.03488	0.006706	0.038967	0.002817	2.19773	0.270908	300	0	0.866248	0.019638	0.031221	0.015962	2.34008	0.582462	30	15	0.916835	0.048717
DB00495	Zidovudine	0	0	HBOMLICNUCNMMY-XLPZGREQSA-N	Pyrimidine nucleosides/Pyrimidine 2',3'-dideoxyribonucleosides	Reverse transcriptase inhibitor.	Mitsuya, H, R Yarchoan, and S Broder. 1990. “Molecular Targets for AIDS Therapy.” Science 249(4976): 1533–44. https://www.sciencemag.org/lookup/doi/10.1126/science.1699273 (November 16, 2020).	0.035015	0.008457	0.020892	0.002582	2.68841	0.103617	302	0	0.928987	0.001484	0.058685	0.0277	1.69541	0.318096	25	10	0.816897	0.080375
DB00753	Isoflurane	-1	0	PIWKPBJCKXDKJR-UHFFFAOYSA-N	Ethers/Methyl Ethers	Anti-inflammatory: Isoflurane pre-treatment prevented the acidosis and endothelial damage to mesenteric and aortic vessels, and attenuated the increase in tumour necrosis factor-alpha (TNF-α) associated with lipopolysaccharide-induced inflammation	Plachinta, Roman V., John K. Hayes, Lisa A. Cerilli, and George F. Rich. 2003. “Isoflurane Pretreatment Inhibits Lipopolysaccharide-Induced Inflammation in Rats.” Anesthesiology 98(1): 89–95. https://pubs.asahq.org/anesthesiology/article/98/1/89/40584/Isoflurane-Pretreatment-Inhibits (November 16, 2020).	0.035164	0.003545	0.020657	0.000469	2.69559	0.223599	300	0	0.931155	0.00204	0.059859	0.026761	1.42738	0.487432	27	12	0.812784	0.081725
DB00537	Ciprofloxacin	-1	1	MYSWGUAQZAJSOK-UHFFFAOYSA-N	Cytochrome P-450 Enzyme Inhibitors/Cytochrome P-450 CYP1A2 Inhibitors	Anti-SARS-CoV-2: Exerts strong capacity for binding to COVID-19 Main Protease (Mpro)	Marciniec, Krzysztof et al. 2020. “Ciprofloxacin and Moxifloxacin Could Interact with SARS-CoV-2 Protease: Preliminary in Silico Analysis.” Pharmacological Reports: 1–9. http://link.springer.com/10.1007/s43440-020-00169-0 (November 16, 2020).	0.035709	0.014614	0.041784	0.01338	2.06672	0.090272	373	0	0.85911	0.021365	0.030516	0.015962	2.44283	0.797455	29	11	0.916425	0.057704
DB01262	Decitabine	0	1	XAUDJQYHKZQPEU-KVQBGUIXSA-N	Cytidine/Azacytidine	Anti-SARS-CoV-2: Binding to viral RNA dependant RNA polymerase (RdRp)	Huang, Ailan et al. 2020. “Virtual Screening and Molecular Dynamics on Blockage of Key Drug Targets as Treatment for COVID-19 Caused by SARS-CoV-2.” https://www.preprints.org/manuscript/202003.0239/v1 (November 16, 2020).	0.036296	0.002593	0.020188	0.000235	2.70757	0.234605	309	0	0.932282	0.002757	0.065258	0.028638	1.68355	0.339337	25	10	0.798047	0.071826
DB00295	Morphine	-1	0	BQJCRHHNABKAKU-KBQPJGBKSA-N	Morphinans/Morphine Derivatives	Anti-COVID: The most prevalent symptoms in COVID-19 are breathlessness, cough, drowsiness, anxiety, agitation, and delirium. Frequently used medicines include opioids such as morphine to alleviate these symptoms	Pettus, Katherine et al. 2020. “Availability of Internationally Controlled Essential Medicines in the COVID-19 Pandemic.” Journal of Pain and Symptom Management 60(2): e48–51. https://www.sciencedirect.com/science/article/pii/S0885392420303754?casa_token=X3K_lhwjVJcAAAAA:9jb0SnNhCvGxPebWharx45vyEPU1igHfJxHydSMDfBCnhM5lzJd1hw9fRbr7KUecpFc4bVEU1g (November 16, 2020).	0.036355	0.004683	0.015258	0.000469	2.8797	0.297088	346	0	0.946691	0.004634	0.08662	0.046714	1.41677	0.304383	25	10	0.736374	0.116728
DB00175	Pravastatin	-1	0	TUZYXOIXSAXUGO-PZAWKZKUSA-N	Polycyclic Aromatic Hydrocarbons/Naphthalenes	Anti-SARS-CoV-2: SARS-CoV-2 Mpro inhibition	Reiner, Željko et al. 2020. “Statins and the COVID-19 Main Protease: In Silico Evidence on Direct Interaction.” Archives of medical science : AMS 16(3): 490–96. http://www.ncbi.nlm.nih.gov/pubmed/32399094 (November 16, 2020).	0.036374	0.008199	0.023005	0.002347	2.57819	0.329454	323	0	0.919154	0.013095	0.057512	0.028638	1.64037	0.522381	27	12	0.804936	0.103177
DB00470	Dronabinol	-1	0	CYQFCXCEBYINGO-IAGOWNOFSA-N	Terpenes/Cannabinoids	Anti-COVID: Suppression of cytokine storm through the induction of apoptosis in immunomodulatory cells.	Mohammed, Amira et al. 2020. “Δ9-Tetrahydrocannabinol Prevents Mortality from Acute Respiratory Distress Syndrome through the Induction of Apoptosis in Immune Cells, Leading to Cytokine Storm Suppression.” International journal of molecular sciences 21(17). http://www.ncbi.nlm.nih.gov/pubmed/32872332 (November 16, 2020).	0.037084	0.007926	0.033099	0.004695	2.29073	0.06234	309	0	0.881398	0.001969	0.041549	0.01338	1.97332	0.507595	34	19	0.871876	0.054369
DB01065	Melatonin	-1	0	DRLFMBDRBRZALE-UHFFFAOYSA-N	Biogenic Monoamines/Tryptamines	Anti-COVID: Melatonin exerts anti-inflammatory effects through various pathways. Sirtuin-1 (SIRT1) may mediate the anti-inflammatory actions of melatonin by inhibiting high mobility group box chromosomal protein 1 (HMGB1), and thus down-regulating the polarization of macrophages towards the pro-inflammatory type	Zhang, Rui et al. 2020. “COVID-19: Melatonin as a Potential Adjuvant Treatment.” Life sciences 250: 117583. http://www.ncbi.nlm.nih.gov/pubmed/32217117 (November 16, 2020).	0.03745	0.00765	0.029577	0.002113	2.3709	0.176419	304	0	0.893243	0.008161	0.047418	0.0277	1.81633	0.616098	26	11	0.864609	0.089688
DB00818	Propofol	-1	0	OLBCVFGFOZPWHH-UHFFFAOYSA-N	Benzene Derivatives/Phenols	Potentially Pro-COVID: Seizures observed in COVID-19 patients sedated with propofol	Lucchetta, Vittorio, Daniele Bonvicini, Andrea Ballin, and Ivo Tiberio. 2020. “Propofol Infusion Syndrome in Severe COVID-19.” British journal of anaesthesia 125(5): e441–42. http://www.ncbi.nlm.nih.gov/pubmed/32912604 (November 16, 2020).	0.038025	0.006697	0.037559	0.002582	2.2102	0.020055	309	0	0.86837	0.00019	0.038498	0.017371	2.08548	0.610781	40	25	0.876923	0.071279
DB00688	Mycophenolate mofetil	1	0	RTGDFNSFWBGLEC-SYZQJQIISA-N	Acids, Acyclic/Caproates	Anti-Inflammatory: Mycophenolate mofetil (MMF) is a prodrug of mycophenolic acid (MPA), an inhibitor of inosine-5'-monophosphate dehydrogenase. MPA depletes guanosine nucleotides preferentially in T and B lymphocytes and inhibits their proliferation, thereby suppressing cell-mediated immune responses and antibody formation.	Allison, A C. 2005. “Mechanisms of Action of Mycophenolate Mofetil.” Lupus 14 Suppl 1: s2-8. http://www.ncbi.nlm.nih.gov/pubmed/15803924 (November 16, 2020).	0.038262	0.009369	0.019014	0.002113	2.73451	0.08324	301	0	0.932287	0.002467	0.076995	0.041549	1.54847	0.404777	26	11	0.770625	0.111079
DB01042	Melphalan	-1	1	SGDBTWWWUNNDEQ-LBPRGKRZSA-N	Mustard Compounds/Nitrogen Mustard Compounds	Pro-Inflammatory: Melphalan activates mitogen‐activated phosphorylated kinases (MAPK), nuclear factor‐κB and the inflammatory response in lung epithelial cells	Österlund, Camilla et al. 2005. “The Nitrogen Mustard Melphalan Activates Mitogen-Activated Phosphorylated Kinases (MAPK), Nuclear Factor-ΚB and Inflammatory Response in Lung Epithelial Cells.” Journal of Applied Toxicology 25(4): 328–37. http://doi.wiley.com/10.1002/jat.1070 (November 16, 2020).	0.038816	0.007714	0.029577	0.004225	2.47889	0.010899	440	0	0.88723	0.021661	0.050939	0.014085	1.88256	0.21549	25	6	0.843709	0.034271
DB01166	Cilostazol	-1	0	RRGUKTPIGVIEKM-UHFFFAOYSA-N	Azoles/Tetrazoles	Anti-SARS-CoV-2: Cilostazol has a dual anti-viral mechanism by inhibiting both Mpro and spike (S) protein	Abosheasha, Mohammed A., and Afnan H. El‐Gowily. 2020. “Superiority of Cilostazol among Antiplatelet FDA ‐approved Drugs against COVID 19 Mpro and Spike Protein: Drug Repurposing Approach.” Drug Development Research: ddr.21743. https://onlinelibrary.wiley.com/doi/10.1002/ddr.21743 (November 16, 2020).	0.039083	0.003637	0.042254	0.000939	2.14721	0.113327	198	0	0.857349	0.000487	0.03615	0.014085	2.36445	0.562612	29	9	0.900446	0.050115
DB00983	Formoterol	-1	0	BPZSYCZIITTYBL-UHFFFAOYSA-N	Amino Alcohols/Ethanolamines	Anti-CoV/Anti-Inflammatory: Potential inhibition of replicative cycle through impairing function of acidic endosomes. Formoterol has been shown to inhibit NF-κB activity.	Yamaya, Mutsuo et al. 2020. “Inhibitory Effects of Glycopyrronium, Formoterol, and Budesonide on Coronavirus HCoV-229E Replication and Cytokine Production by Primary Cultures of Human Nasal and Tracheal Epithelial Cells.” Respiratory Investigation 58(3): 155–68. https://www.sciencedirect.com/science/article/pii/S2212534520300058?casa_token=i89PmyMeeBoAAAAA:19kDdgTOTV4rkqEg8TyI4ER8E5vyw2sYCSldLnwI…	0.03947	0.013621	0.071362	0.008685	1.70586	0.039662	241	0	0.757801	0.040664	0.021831	0.021362	2.07805	1.34762	185	56	0.914381	0.085161
DB09026	Aliskiren	-1	0	UXOWGYHJODZGMF-QORCZRPOSA-N	Dicarboxylic Acids/Fumarates	Anti-SARS-CoV-2: Inhibition of Mpro	Aly, Omar. “Molecular Docking Reveals the Potential of Aliskiren, Dipyridamole, Mopidamol, Rosuvastatin, Rolitetracycline and Metamizole to Inhibit COVID-19 Virus Main Protease.” https://s3-eu-west-1.amazonaws.com/itempdf74155353254prod/12061302/Molecular_Docking_Reveals_the_Potential_of_Aliskiren__Dipyridamole__Mopidamol__Rosuvastatin__Rolitetracycline_and_Metami_v1.pdf (November 16, 2020).	0.039622	0.008273	0.060798	0.004225	1.7596	0.022096	99	0	0.775176	0.016866	0.025822	0.016197	2.42444	0.926797	25	6	0.905955	0.073809
DB00421	Spironolactone	-1	0	LXMSZDCAJNLERA-ZHYRCANASA-N	Organic Chemicals/Lactones	Anti-SARS-CoV-2/Anti-COVID/Anti-Inflammatory: Multiple potential mechanism of action: Including potential increase of circulating angiotensin converting enzyme 2 (ACE2); plasma ACE2 may couple to SARS-CoV-2 and avoid its entry in the cells Downregulation of the androgen-mediated transmembrane serine protease 2 (TMPRSS2) due to its antiandrogenic activity Direct anti-inflammatory and anti-viral ef…	﻿Bendtzen, K, P R Hansen, K Rieneck, and THE SPIRONOLACTONE/ARTHRITIS STUDY Spironolactone/Arthritis Study Group. 2003. “Spironolactone Inhibits Production of Proinflammatory Cytokines, Including Tumour Necrosis Factor-Alpha and Interferon-Gamma, and Has Potential in the Treatment of Arthritis.” Clinical and experimental immunology 134(1): 151–58. http://www.ncbi.nlm.nih.gov/pubmed/12974768 (Nove…	0.039706	0.008945	0.023239	0.002582	2.57695	0.070505	302	0	0.915669	0.003349	0.06784	0.030986	1.42142	0.39259	27	12	0.787789	0.092772
DB01128	Bicalutamide	-1	1	LKJPYSCBVHEWIU-UHFFFAOYSA-N	Amines/Anilides	Anti-COVID: Antiandrogens, such as bicalutamide or enzalutamide, may prevent complications of COVID-19, as a relationship between testosterone and thrombosis has been previously described. High testosterone levels could contribute to the development of microthrombi and venous thromboembolism, which are characteristic of patients with severe COVID-19	Cattrini, Carlo et al. 2020. “Sex Hormones and Hormone Therapy during COVID-19 Pandemic: Implications for Patients with Cancer.” Cancers 12(8). http://www.ncbi.nlm.nih.gov/pubmed/32824674 (November 16, 2020).	0.039814	0.011333	0.030282	0.00493	2.35934	0.345398	357	0	0.891602	0.021904	0.052347	0.026056	1.70351	0.393514	25	1	0.824661	0.075326
DB01586	Ursodeoxycholic acid	-1	0	RUDATBOHQWOJDD-UZVSRGJWSA-N	Cholagogues and Choleretics/Deoxycholic Acid	Anti-COVID: Attenuation of cytokine storm; in many studies, ursodeoxycholic acid inhibits the pro-inflammatory cytokines tumour necrosis factor alpha (TNF-α), interleukin beta (IL-1β), IL-2, IL-4 and IL-6 at the mRNA and protein levels	Abdulrab, Saleem, Sadeq Al-Maweri, and Esam Halboub. 2020. “Ursodeoxycholic Acid as a Candidate Therapeutic to Alleviate and/or Prevent COVID-19-Associated Cytokine Storm.” Medical hypotheses 143: 109897. http://www.ncbi.nlm.nih.gov/pubmed/32505909 (November 16, 2020).	0.03991	0.003385	0.028873	0.000469	2.40233	0.122363	276	0	0.893067	0.004529	0.055164	0.024413	1.84123	0.49074	25	7	0.835935	0.073513
DB01004	Ganciclovir	0	0	IRSCQMHQWWYFCW-UHFFFAOYSA-N	Guanine/Acyclovir	Anti-SARS-CoV-2: Ganciclovir was predicted to bind to three subunits of the replication complex of SARS-CoV-2: RNA-dependent RNA polymerase, 3′-to-5′ exonuclease, and RNA helicase.	Beck, Bo Ram et al. 2020. “Predicting Commercially Available Antiviral Drugs That May Act on the Novel Coronavirus (SARS-CoV-2) through a Drug-Target Interaction Deep Learning Model.” Computational and Structural Biotechnology Journal 18: 784–90. https://www.sciencedirect.com/science/article/pii/S2001037020300490 (November 16, 2020).	0.04116	0.006454	0.029577	0.002817	2.37818	0.284073	237	0	0.894265	0.014762	0.057277	0.014789	1.81077	0.211994	33	18	0.828061	0.037043
BRD-K76723084	isotretinoin	0	0	SHGAZHPCJJPHSC-XFYACQKRSA-N	Carotenoids/Retinoids	Anti-SARS-CoV-2: Suggested that isotretinoin is an inhibitor of papain like protease (PLpro) inhibitor - a key enzyme in viral replication.	Elgarhy, Lamia H. 2020. “Could Patients Taking Isotretinoin Therapy Be Immune against SARS-CoV-2?” Dermatologic Therapy. https://doi.org/10.20944/preprints202003.0446.v1. (November 16, 2020).	0.041268	0.014671	0.023944	0.007277	2.7593	0.083785	905	0	0.918965	0.024927	0.071127	0.029577	1.52658	0.406309	25	10	0.78335	0.080016
DB08868	Fingolimod	0	0	KKGQTZUTZRNORY-UHFFFAOYSA-N	Amino Alcohols/Sphingosine	Anti-COVID: Fingolimod acts as a functional antagonist of sphingosine 1-phosphate-1 S1P1 receptors in the lymph node T cells. Bound S1P1 receptors are internalized and the lymph node T cells sequestered. Decreased pulmonary T lymphocytes is an approach to attenuate uncontrolled immunopathogenesis.	Lythgoe, Mark P, and Paul Middleton. 2020. “Ongoing Clinical Trials for the Management of the COVID-19 Pandemic.” Trends in pharmacological sciences 41(6): 363–82. http://www.ncbi.nlm.nih.gov/pubmed/32291112 (November 16, 2020).	0.041443	0.011604	0.025822	0.00493	2.47381	0.013219	296	0	0.906914	0.000312	0.066516	0.027314	1.44639	0.33733	26	11	0.787069	0.076885
DB01611	Hydroxychloroquine	1	0	XXSMGPRMXLTPCZ-UHFFFAOYSA-N	Aminoquinolines/Chloroquine	Anti-SARS-CoV-2: Alkalinisation of the intracellular phagolysosome by hydroxychloroquine prevents virion fusion, uncoating and viral spread.	﻿Vincent, Martin J et al. 2005. “Chloroquine Is a Potent Inhibitor of SARS Coronavirus Infection and Spread.” Virology Journal 2(1): 69. http://virologyj.biomedcentral.com/articles/10.1186/1743-422X-2-69 (November 16, 2020). ; ﻿Savarino, Andrea et al. 2003. “Effects of Chloroquine on Viral Infections: An Old Drug against Today’s Diseases?” The Lancet. Infectious diseases 3(11): 722–27. http://www…	0.041505	0.003879	0.023005	0.000704	2.58099	0.322482	184	0	0.919461	0.012444	0.074883	0.021362	1.53115	0.322795	25	10	0.77266	0.064026
DB00917	Dinoprostone	-1	0	XEYBRNLFEZDVAW-ARSRFYASSA-N	Prostaglandins/Prostaglandins E	Pro-Inflammatory: Dinoprostone (Prostaglandin E2 (PGE2)) has several pro-inflammatory mechanisms including: Activating mast cells via the Prostaglandin E (EP) 3 receptor in mouse skin; facilitating T-helper 1 (Th1) differentiation and Th17 cell expansion via EP2/4 receptors.	Kawahara, Kohichi et al. 2015. “Prostaglandin E2-Induced Inflammation: Relevance of Prostaglandin E Receptors.” Biochimica et Biophysica Acta (BBA) - Molecular and Cell Biology of Lipids 1851(4): 414–21. https://www.sciencedirect.com/science/article/pii/S1388198114001413?casa_token=j166uEYpskAAAAAA:FL1exPeN6KOfXXmcD3IiYuSeZ8Mbu13Tpb9liwmlEYt2CXv9IBEJvedI1lelu6ZgfvH_xn56KQ (November 16, 2020).	0.041636	0.010706	0.061033	0.006103	1.80133	0.005192	387	0	0.784071	0.021036	0.028404	0.018779	2.22288	0.792562	25	10	0.90788	0.068922
DB00220	Nelfinavir	0	0	QAGYKUNXZHXKMR-HKWSIXNMSA-N	Heterocyclic Compounds, 2-Ring/Isoquinolines	Anti-Viral: Human immunodeficiency virus (HIV) protease inhibitor	https://www.drugbank.ca/drugs/DB00220	0.042723	0.017483	0.046009	0.010094	2.08251	0.312294	271	0	0.845242	0.030544	0.039671	0.030282	2.21082	1.07921	25	9	0.897375	0.089097
DB00910	Paricalcitol	0	0	BPKAHTKRCLCHEA-UBFJEZKGSA-N	Vitamins/Ergocalciferols	Anti-COVID: Paricalcitol suppresses stellate cell-derived murine hepatic and pancreatic pro-inflammatory and pro-fibrotic changes. Potential to repurpose paricalcitol infusion therapy to restrain the COVID-19 cytokine storm.	Evans, Ronald M., and Scott M. Lippman. 2020. “Shining Light on the COVID-19 Pandemic: A Vitamin D Receptor Checkpoint in Defense of Unregulated Wound Healing.” Cell Metabolism 32(5): 704–9. https://www.sciencedirect.com/science/article/pii/S155041312030485X?casa_token=SPcbGkIBUIYAAAAA:_oKQX9vmlpy0ophPHG5B-q5j_xCmMDYLIuMsAm_fg1asJm0lgaeXbxjEHY89z5QPjgmIr46Wzw (November 16, 2020).	0.043929	0.016028	0.039906	0.008685	2.17913	0.09017	65	0	0.863027	0.012307	0.048357	0.029577	1.934	0.748985	25	10	0.857473	0.103303
DB11123	Hypochlorite	-1	0	WQYVRQLZKVEZGA-UHFFFAOYSA-N	Free Radicals/Reactive Oxygen Species	Disinfectant	Chatterjee, Abhijit. 2020. “Use of Hypochlorite Solution as Disinfectant during COVID-19 Outbreak in India: From the Perspective of Human Health and Atmospheric Chemistry.” Aerosol and Air Quality Research 20(7): 1516–19. https://aaqr.org/articles/aaqr-20-05-covid-0253 (November 16, 2020).	0.045867	0.00244	0.047418	0.000235	2.06683	0.061739	300	0	0.832853	0.00933	0.044366	0.025352	2.10631	0.77452	25	10	0.869264	0.081651
DB00813	Fentanyl	-1	0	PJMPHNIQZUBGLI-UHFFFAOYSA-N	Heterocyclic Compounds, 1-Ring/Piperidines	Sedative (No link to COVID)	Schechter, Neil L. et al. 1995. “The Use of Oral Transmucosal Fentanyl Citrate for Painful Procedures in Children.” Pediatrics 95(3). https://pediatrics.aappublications.org/content/95/3/335 (November 16, 2020).	0.046147	0.022046	0.080282	0.023005	1.61271	0.123799	303	0	0.731624	0.071687	0.026526	0.021127	2.45194	1.11874	27	12	0.909841	0.082517
DB00406	Gentian Violet	-1	0	LGLFFNDHMLKUMI-UHFFFAOYSA-N	Amines/Aniline Compounds	Anti-Inflammatory: Induced high levels of cell killing in cutaneous T-cell lymphoma.	Wu, Jianqiang, and Gary S Wood. 2018. “Analysis of the Effect of Gentian Violet on Apoptosis and Proliferation in Cutaneous T-Cell Lymphoma in an In Vitro Study.” JAMA dermatology 154(10): 1191–98. http://www.ncbi.nlm.nih.gov/pubmed/30167641 (November 16, 2020).	0.047006	0.009378	0.028873	0.003286	2.3967	0.289188	300	0	0.896829	0.014716	0.076526	0.026761	1.45816	0.352567	26	11	0.771998	0.070061
DB00834	Mifepristone	-1	0	VKHAHZOOUSRJNA-GCNJZUOMSA-N	Abortifacient Agents/Abortifacient Agents, Steroidal	Anti-Inflammatory: Reduces concentrations of pro-inflammatory cytokines TNF-α, IL-6 in vivo	Wu, Jianqiang, and Gary S Wood. 2018. “Analysis of the Effect of Gentian Violet on Apoptosis and Proliferation in Cutaneous T-Cell Lymphoma in an In Vitro Study.” JAMA dermatology 154(10): 1191–98. http://www.ncbi.nlm.nih.gov/pubmed/30167641 (November 16, 2020).	0.047129	0.008192	0.04061	0.003286	2.1284	0.04219	304	0	0.842632	0.018894	0.054695	0.020423	1.70267	0.386086	25	10	0.832187	0.064739
DB00563	Methotrexate	-1	1	FBOZXECLQNJBKD-ZDUSSCGKSA-N	Pterins/Aminopterin	Anti-COVID: Attenuation of over-active immune system through significant reduction of IL-6 and TNFa in T cells and increase regulatory T cells	Safavi, Farinaz, and Avindra Nath. 2020. “Silencing of Immune Activation with Methotrexate in Patients with COVID-19.” https://www.jns-journal.com/action/showPdf?pii=S0022-510X%2820%2930279-3 (November 16, 2020).	0.047168	0.003823	0.024178	0.000235	2.52272	0.091081	300	0	0.903667	0.009177	0.092019	0.062246	1.27126	0.417357	25	10	0.744884	0.157798
DB00907	Cocaine	-1	0	ZPUCINDJVBIVPJ-LJISPDSOSA-N	Azabicyclo Compounds/Tropanes	Pro-Inflammatory: In vitro findings demonstrated that exposure of pericytes to cocaine resulted in upregulation of the pro-inflammatory cytokines (TNF-α, IL-1β, and IL-6) in both the intracellular as well as extracellular compartments.	Sil, Susmita et al. 2019. “Cocaine Mediated Neuroinflammation: Role of Dysregulated Autophagy in Pericytes.” Molecular neurobiology 56(5): 3576–90. http://www.ncbi.nlm.nih.gov/pubmed/30151726 (November 16, 2020).	0.047533	0.007334	0.030751	0.001878	2.35598	0.100674	302	0	0.891122	0.006825	0.073474	0.028638	1.50299	0.369289	25	10	0.772251	0.083737
DB00503	Ritonavir	0	0	NCDNCNXCDXHOMX-XGKFQTDJSA-N	Cytochrome P-450 Enzyme Inhibitors/Cytochrome P-450 CYP3A Inhibitors	Anti-SARS-CoV-2: Inhibition of SARS-CoV-2 Mpro	Muralidharan, Nisha, R. Sakthivel, D. Velmurugan, and M. Michael Gromiha. 2020. “Computational Studies of Drug Repurposing and Synergism of Lopinavir, Oseltamivir and Ritonavir Binding with SARS-CoV-2 Protease against COVID-19.” Journal of Biomolecular Structure and Dynamics: 1–6. https://www.tandfonline.com/doi/full/10.1080/07391102.2020.1752802 (November 16, 2020).	0.047884	0.010078	0.044601	0.00446	2.11298	0.208492	326	0	0.851046	0.009425	0.051408	0.02277	1.89282	0.498648	31	13	0.841226	0.061978
DB00399	Zoledronic acid	-1	1	XRASPMIURGNCCH-UHFFFAOYSA-N	Organophosphonates/Diphosphonates	Pro-Inflammatory: Zoledronic acid treatment upregulated the expression of IL-1β mRNA and protein through nod-like receptor protein 3 (NLRP3) inflammasome activation in LPS-treated THP-1 cells	Kaneko, Junya et al. 2018. “Zoledronic Acid Exacerbates Inflammation through M1 Macrophage Polarization.” Inflammation and regeneration 38: 16. http://www.ncbi.nlm.nih.gov/pubmed/29977413 (November 16, 2020).	0.048198	0.00725	0.025117	0.001408	2.49411	0.273044	300	0	0.909419	0.010305	0.092488	0.037324	1.26125	0.336769	30	15	0.719269	0.111101
DB00307	Bexarotene	-1	1	NAVMQTYZDKMPEU-UHFFFAOYSA-N	Carotenoids/Retinoids	Anti-SARS-CoV-2: Interference with viral cell attachment machinery, potentially through binding to ACE2	Yuan, Shuofeng et al. 2020. “Discovery of the FDA-Approved Drugs Bexarotene, Cetilistat, Diiodohydroxyquinoline, and Abiraterone as Potential COVID-19 Treatments with a Robust Two-Tier Screening System.” Pharmacological Research 159: 104960. https://www.sciencedirect.com/science/article/pii/S1043661820312688?casa_token=YWAaLVDqqQ0AAAAA:3UD8zH093iErJmiUHV4EQiK30P3308-87tsDTOQUeubnxGOszWIzF26xXuyWA…	0.04902	0.008739	0.055634	0.00493	1.83341	0.062537	175	0	0.805623	0.012616	0.043192	0.015493	1.99208	0.275241	26	10	0.877155	0.038713
DB01406	Danazol	-1	0	POZRVZJJTULAOH-LHZXLZLDSA-N	Hormone Antagonists/Oestrogen Antagonists	N/A	N/A	0.049235	0.011167	0.03662	0.007277	2.21738	0.017137	245	0	0.872427	0.019279	0.066197	0.017136	1.55398	0.264293	25	7	0.791269	0.051465
DB00179	Masoprocol	-1	0	HCZKYJDFEPMADG-TXEJJXNPSA-N	Benzyl Compounds/Lignans	Anti-SARS-CoV-2: Weak interaction with the SARS-CoV-2 N-protein	Lavecchia, Martin, and Julian Fernandez. 2020. “Small Molecule Stabilization of Non-Native Protein-Protein Interactions of SARS-CoV-2 N Protein as a Mechanism of Action against COVID-19.” https://www.preprints.org/manuscript/202007.0558/v2 (November 16, 2020).	0.049517	0.006017	0.072535	0.002113	1.68493	0.087697	100	0	0.762178	0.010105	0.033803	0.017136	2.26293	0.579318	27	0	0.895706	0.06175
DB00584	Enalapril	-1	0	GBXSMTUPTTWBMN-XIRDDKMYSA-N	oligopeptide/dipeptide	Anti-SARS-CoV-2: Enalapril is an inhibitor of ACE-2, potential efficacy in preventing SARS-CoV-2 access to cells. However in vitro studies showed no significant change in expression of ACE-2 in cells treated with enalapril	Saheb Sharif-Askari, Narjes et al. 2020. “Cardiovascular Medications and Regulation of COVID-19 Receptors Expression.” International Journal of Cardiology Hypertension 6: 100034. https://www.sciencedirect.com/science/article/pii/S2590086220300112 (November 16, 2020).	0.050039	0.011075	0.033333	0.003286	2.28863	0.010694	247	0	0.877424	0.003648	0.075117	0.037324	1.54424	0.521914	25	10	0.769642	0.091255
DB01098	Rosuvastatin	-1	0	BPRHUIZQVSMCRT-VEUZHWNKSA-N	Benzene Derivatives/Fluorobenzenes	Anti-SARS-CoV-2: Rosuvastatin could be an efficient SARS-CoV-2 Mpro inhibitor	Reiner, Željko et al. 2020. “Statins and the COVID-19 Main Protease: In Silico Evidence on Direct Interaction.” Archives of medical science : AMS 16(3): 490–96. http://www.ncbi.nlm.nih.gov/pubmed/32399094 (November 16, 2020).	0.050239	0.009735	0.030986	0.002347	2.3519	0.083929	248	0	0.890534	0.009046	0.081455	0.040376	1.29653	0.394846	25	10	0.762057	0.1198
DB06755	Beta carotene	-1	0	OENHQHLEOONYIE-JLTXGRSLSA-N	Vitamins/Provitamins	Pro-Immunity: Beta carotene gets converted to vitamin A, which is necessary for a strong immune system. It works by helping antibodies respond to toxins and foreign substances	Anwar, Saqaina et al. 2020. “Organic Diet as Silent Pretreatment Strategy to Boost Immune System Against SARS-CoV-2.” Alq J Med App Sci 3(2): 10–25. https://alqalam.utripoli.edu.ly/science/eISSN2707-7179 (November 16, 2020).	0.05105	0.012141	0.050235	0.005869	1.8786	0.114522	302	0	0.827148	0.013553	0.051878	0.025117	1.75915	0.602261	25	10	0.845115	0.087375
DB00746	Deferoxamine	1	0	UBQYURCVBFRUQT-UHFFFAOYSA-N	Hydroxylamines/Hydroxamic Acids	Anti-Viral: Based on depriving iron supply to the virus (drug is an iron chelator), promising as an adjuvant therapy. Inhibitor of ribonucleotide reductase 2 - involved in reverse transcription.	﻿Dalamaga, Maria, Irene Karampela, and Christos S Mantzoros. 2020. “Commentary: Could Iron Chelators Prove to Be Useful as an Adjunct to COVID-19 Treatment Regimens?” https://doi.org/10.1016/j.metabol.2020.154260 (November 16, 2020) ; ﻿Liu, Wei, Shuping Zhang, Sergei Nekhai, and Sijin Liu. “Depriving Iron Supply to the Virus Represents a Promising Adjuvant Therapeutic Against Viral Survival.” htt…	0.05137	0.008957	0.035915	0.001643	2.24145	0.123361	289	0	0.871469	0.002095	0.073474	0.048826	1.35546	0.472224	25	10	0.767911	0.146765
DB01039	Fenofibrate	-1	0	YMTINGFKWWXKFG-UHFFFAOYSA-N	Isobutyrates/Fibric Acids	Anti-Viral: Fenofibrate, which is a PPAR-alpha agonist, increases the level of sulfatide, which can reduce infectivity of viruses	Buschard, Karsten. 2020. “Fenofibrate Increases the Amount of Sulfatide Which Seems Beneficial against Covid-19.” Medical Hypotheses 143: 110127. https://www.sciencedirect.com/science/article/pii/S0306987720322477 (November 16, 2020).	0.05238	0.0051	0.032864	0.000704	2.29157	0.042292	304	0	0.881527	0.008007	0.083485	0.036938	1.31768	0.322969	25	9	0.745411	0.113574
DB00177	Valsartan	1	0	ACWBQPMHZXGDFX-QFIPXVFZSA-N	Amino Acids, Branched-Chain/Valine	Anti-Inflammatory: Valsartan reduces the concentration of pro-inflammatory cytokines and neutrophil count	Acanfora, Domenico et al. 2020. “Neprilysin Inhibitor-Angiotensin II Receptor Blocker Combination (Sacubitril/Valsartan): Rationale for Adoption in SARS-CoV-2 Patients.” European heart journal. Cardiovascular pharmacotherapy 6(3): 135–36. http://www.ncbi.nlm.nih.gov/pubmed/32282032 (November 16, 2020).	0.052549	0.017877	0.050704	0.011737	1.98894	0.003688	262	0	0.826262	0.006782	0.05446	0.02723	1.5463	0.543128	189	73	0.827301	0.103068
DB00966	Telmisartan	1	0	RMMXLENWKUUMAY-UHFFFAOYSA-N	Benzene Derivatives/Biphenyl Compounds	Anti-Inflammatory: Telmisartan ameliorates inflammation in various brain disorders through angiotensin II type 1 receptor (AT1) blockade and peroxisome proliferator-activated receptor gamma (PPARγ) activation	Wang, Ze-Fen et al. 2020. “Telmisartan Ameliorates Aβ Oligomer-Induced Inflammation via PPARγ/PTEN Pathway in BV2 Microglial Cells.” Biochemical pharmacology 171: 113674. http://www.ncbi.nlm.nih.gov/pubmed/31634455 (November 16, 2020).	0.052987	0.016955	0.045305	0.011033	2.09186	0.017601	318	0	0.850384	0.013414	0.061972	0.026056	1.57994	0.402948	25	5	0.812023	0.075655
DB01030	Topotecan	-1	1	UCFGDBYHRUNTLO-QHCPKHFHSA-N	Alkaloids/Camptothecin	Anti-Inflammatory: Inhibits NF-κB signalling pathway	Jin, Jiajia et al. 2019. “Topotecan Alleviates Lipopolysaccharide-Mediated Acute Lung Injury Via the NF-ΚB Signaling Pathway.” Journal of Surgical Research 235: 83–92. https://www.sciencedirect.com/science/article/pii/S0022480418306280 (November 16, 2020).	0.053238	0.010537	0.078404	0.007277	1.62817	0.110688	135	0	0.73609	0.003153	0.03615	0.015258	2.31132	0.488299	25	10	0.912576	0.044947
DB04743	Nimesulide	-1	0	HYWYRSMBCFDLJT-UHFFFAOYSA-N	Sulfones/Sulphonamides	Anti-SARS-CoV-2: ACE2 interacts with sodium-dependent neutral amino acid transporter 1 (B0AT1), a plasma membrane transporter involved in the trafficking of amino acids in cells. B0AT1 has been found to stabilise the heterodimer between SARS-CoV-2 and ACE2 . Nimesulide was shown to abolish the transport function of B0AT1 therefore potentially interfering with SARS-CoV-2 infectivity mechanisms	Scalise, Mariafrancesca, and Cesare Indiveri. 2020. “Repurposing Nimesulide, a Potent Inhibitor of the B0AT1 Subunit of the SARS-CoV-2 Receptor, as a Therapeutic Adjuvant of COVID-19.” SLAS discovery : advancing life sciences R & D: 2472555220934421. http://journals.sagepub.com/doi/10.1177/2472555220934421 (November 16, 2020).	0.053382	0.006688	0.05493	0.002817	1.90358	0.15429	172	0	0.807385	0.01224	0.051878	0.015878	1.88221	0.401096	32	17	0.846267	0.061476
DB00722	Lisinopril	-1	0	RLAWWYSOJDYHDC-BZSNNMDCSA-N	Oligopeptides/Dipeptides	Pro-SARS-CoV-2: Lisinopril increased expression of ACE2 in vivo, potentially facilitating SARS-CoV-2 infection	Zheng, Ying-Ying, Yi-Tong Ma, Jin-Ying Zhang, and Xiang Xie. 2020. “Reply to: ‘Interaction between RAAS Inhibitors and ACE2 in the Context of COVID-19.’” Nature Reviews Cardiology 17(5): 313–14. http://www.nature.com/articles/s41569-020-0369-9 (November 16, 2020).	0.05355	0.004502	0.049061	0.000469	2.02202	0.087146	199	0	0.833174	0.002389	0.058451	0.043166	1.74465	0.776908	117	82	0.819306	0.138177
BRD-A23723433	paclitaxel	0	1	RCINICONZNJXQF-UHFFFAOYSA-N	Diterpenes/Taxoids	Anti-Inflammatory: Paclitaxel decrease levels of the serum cytokines IL-1 and TNF-α	Mirzapoiazova, T et al. “Suppression of Endotoxin-Induced Inflammation by Taxol.” https://erj.ersjournals.com/content/erj/30/3/429.full.pdf (November 16, 2020).	0.053958	0.002902	0.083803	0.000704	1.57268	0.005012	302	0	0.708423	0.011419	0.034742	0.011961	2.37416	0.356691	25	6	0.912005	0.032428
DB00541	Vincristine	-1	1	OGWKCGZFUXNPDA-XQKSVPLYSA-N	Secologanin Tryptamine Alkaloids/Vinca Alkaloids	N/A	N/A	0.055014	0.013895	0.039671	0.003756	2.18202	0.058026	302	0	0.854813	0.018522	0.076291	0.051408	1.23745	0.37277	26	11	0.763543	0.165209
DB00786	Marimastat	-1	0	OCSMOTCMPXTDND-OUAUKWLOSA-N	Hydroxylamines/Hydroxamic Acids	Anti-SARS-CoV-2: Inhibition of viral replication, potentially by perturbing host pathways required by the virus or influence viral protein activity through post-translational modifications	Stukalov, Alexey et al. “Multi-Level Proteomics Reveals Host-Perturbation Strategies of SARS-CoV-2 and SARS-CoV.” https://doi.org/10.1101/2020.06.17.156455 (November 16, 2020).	0.055156	0.013104	0.056103	0.005869	1.89283	0.001142	135	0	0.804899	0.019035	0.054225	0.029259	1.71975	0.665113	28	12	0.827887	0.116198
DB02701	Nicotinamide	-1	0	DFPAKSUCGFBDDF-UHFFFAOYSA-N	Vitamins/Vitamin B Complex	Anti-SARS-CoV-2: Binding with Mpro	Kandeel, Mahmoud, and Mohammed Al-Nazawi. 2020. “Virtual Screening and Repurposing of FDA Approved Drugs against COVID-19 Main Protease.” Life sciences 251: 117627. http://www.ncbi.nlm.nih.gov/pubmed/32251634 (November 16, 2020).	0.056314	0.013384	0.043427	0.00446	2.08267	0.046807	303	0	0.854113	0.002208	0.073026	0.040162	1.27793	0.472093	68	0	0.779244	0.108448
DB08834	Tauroursodeoxycholic acid	-1	0	BHTRKEVKTKCXOH-LBSADWJPSA-N	Detergents/Taurochenodeoxycholic Acid	Anti-Viral: Tauroursodeoxycholic acid (TUDCA) inhibits influenza A viral infection by disrupting viral proton channel M2	Li, Ning et al. 2019. “Tauroursodeoxycholic Acid (TUDCA) Inhibits Influenza A Viral Infection by Disrupting Viral Proton Channel M2.” Science bulletin 64(3): 180–88. http://www.ncbi.nlm.nih.gov/pubmed/32288967 (November 16, 2020).	0.05659	0.011979	0.039202	0.00493	2.18975	0.025041	255	0	0.864874	0.007391	0.08169	0.029108	1.4087	0.445869	49	34	0.761777	0.085035
DB01008	Busulfan	-1	1	COVZYZSDYWQREU-UHFFFAOYSA-N	Glycols/Butylene Glycols	Pro-Inflammatory: Induction of liver inflammation through modulation of NLRP3	Qiao, Jianlin et al. 2015. “Busulfan and Cyclosphamide Induce Liver Inflammation through NLRP3 Activation in Mice after Hematopoietic Stem Cell Transplantation.” Scientific reports 5: 17828. http://www.ncbi.nlm.nih.gov/pubmed/26635145 (November 16, 2020).	0.056825	0.006581	0.046948	0.001408	2.06833	0.05167	172	0	0.842479	0.00026	0.068779	0.030751	1.5234	0.377349	25	10	0.780473	0.085885
DB00594	Amiloride	-1	0	XSDQTOBWRPYKKA-UHFFFAOYSA-N	Heterocyclic Compounds, 1-Ring/Pyrazines	Anti-SARS-CoV-2: Amiloride is a prototypic inhibitor of epithelial sodium channels (ENaC), and has an ACE2 reducing capability	Adil, Mir S., S. Priya Narayanan, and Payaningal R. Somanath. 2020. “Is Amiloride a Promising Cardiovascular Medication to Persist in the COVID-19 Crisis?” Drug Discoveries & Therapeutics 14(5): 256–58.	0.056994	0.010508	0.035211	0.001408	2.22008	0.034006	300	0	0.875613	0.002086	0.092254	0.078404	0.964573	0.698927	25	10	0.721857	0.251149
DB00437	Allopurinol	-1	0	OFCNXPDARWKPPY-UHFFFAOYSA-N	Heterocyclic Compounds, 2-Ring/Purines	Anti-SARS-CoV-2: Lowered the expression level of TMPRSS2, which is a critical component of the SARS-CoV-2 entry mechanism	Saheb Sharif-Askari, Narjes et al. 2020. “Effect of Common Medications on the Expression of SARS-CoV-2 Entry Receptors in Kidney Tissue.” Clinical and translational science. http://www.ncbi.nlm.nih.gov/pubmed/32799423 (November 16, 2020).	0.059445	0.01069	0.04507	0.007981	1.98759	0.122015	300	0	0.850412	0.010708	0.078404	0.014319	1.52653	0.18445	25	10	0.761955	0.045726
DB01119	Diazoxide	-1	1	GDLBFKVLRPITMI-UHFFFAOYSA-N	Thiazides/Benzothiadiazines	Anti-Inflammatory: IL-6/IL-10, IL-8/IL-10 expression reduced by diazoxide treatment	Wang, Xin et al. 2004. “The Anti-Inflammatory Effect of Diaxozide in Coronary Artery Bypass Grafting.” Shock 22(1): 23–28. http://journals.lww.com/00024382-200407000-00004 (November 16, 2020).	0.059852	0.020036	0.05892	0.011033	1.84888	0.277912	239	0	0.794489	0.038042	0.060798	0.036385	1.82016	0.668141	28	11	0.818148	0.115856
DB00770	Alprostadil	0	0	GMVPRGQOIOIIMI-DWKJAMRDSA-N	Prostaglandins/Prostaglandins E	Anti-Inflammatory: Alprostadil can inhibit inflammation and leukocyte-related activities in inflammation to reduce inflammation-related effects through inhibiting the Janus kinase 2 (JAK2)/signal transducer and activator of transcription 3 (STAT3) signalling pathway.	Fei, Shuke et al. 2019. “Protective Effect of Alprostadil on Acute Pancreatitis in Rats via Inhibiting Janus Kinase 2 (JAK2)/STAT3 Signal Transduction Pathway.” Medical science monitor : international medical journal of experimental and clinical research 25: 7694–7701. http://www.ncbi.nlm.nih.gov/pubmed/31606729 (November 16, 2020).	0.060069	0.01492	0.051408	0.00939	1.92276	0.055379	301	0	0.823956	0.026952	0.070188	0.023709	1.55548	0.279686	25	10	0.790325	0.064732
DB00627	Niacin	-1	0	PVNIIMVLHYAWGP-UHFFFAOYSA-N	Vitamins/Vitamin B Complex	Anti-SARS-CoV-2: Niacin binds to the catalytic pocket of Mpro, thereby modestly inhibiting its enzymatic activity	Gao, Jia et al. 2020. “Repurposing Low-Molecular-Weight Drugs against the Main Protease of Severe Acute Respiratory Syndrome Coronavirus 2.” The journal of physical chemistry letters 11(17): 7267–72. http://www.ncbi.nlm.nih.gov/pubmed/32787337 (November 16, 2020).	0.060125	0.015514	0.066667	0.009155	1.7475	0.005142	300	0	0.768924	0.025781	0.054225	0.026291	1.75359	0.398641	200	0	0.837939	0.07716
DB01050	Ibuprofen	-1	0	HEFNNWSXXWATRW-UHFFFAOYSA-N	Acids, Carbocyclic/Phenylpropionates	Anti-COVID: Due to it's ability to inhibit cyclooxygenase 2 (COX-2), it may delay the resolution of inflammation seen in COVID	Dhillon, Paraminder, Manuel Breuer, and Natasha Hirst. “COVID‐19 Breakthroughs: Separating Fact from Fiction.” https://orcid.org/0000-0001-5115-6361 (November 16, 2020).	0.060569	0.013318	0.053521	0.008685	1.89209	0.038371	346	0	0.813492	0.01747	0.068545	0.020423	1.60954	0.266266	25	8	0.785693	0.058857
DB00644	Gonadorelin	-1	0	XLXSAKCOAKORKW-UHFFFAOYSA-N	Hypothalamic Hormones/Pituitary Hormone-Releasing Hormones	Anti-SARS-CoV-2: In silico evidence for binding of gonadorelin to S-Protein RBD	Maffucci, Irene, and Alessandro Contini. 2020. “In Silico Drug Repurposing for SARS-CoV-2 Main Proteinase and Spike Proteins.” Cite This: J. Proteome Res 19: 4648. https://dx.doi.org/10.1021/acs.jproteome.0c00383 (November 16, 2020).	0.060923	0.019286	0.045305	0.010563	2.02382	0.073037	300	0	0.847998	0.013672	0.081925	0.035211	1.25332	0.365906	25	10	0.74861	0.095421
DB00338	Omeprazole	0	0	SUBDBMMJDZJVOS-UHFFFAOYSA-N	Sulfoxides/2-Pyridinylmethylsulfinylbenzimidazoles	Anti-SARS-CoV-2: Binding to the C-terminal domain of Mpro	Gao, Jia et al. 2020. “Repurposing Low-Molecular-Weight Drugs against the Main Protease of Severe Acute Respiratory Syndrome Coronavirus 2.” The journal of physical chemistry letters 11(17): 7267–72. http://www.ncbi.nlm.nih.gov/pubmed/32787337 (November 16, 2020).	0.061149	0.01068	0.061502	0.005399	1.74529	0.052538	307	0	0.781884	0.024568	0.060798	0.021127	1.60939	0.496259	25	6	0.821368	0.074387
BRD-A56892734	esomeprazole	0	0	KWORUUGOSLYAGD-UHFFFAOYSA-N	2-Pyridinylmethylsulfinylbenzimidazoles/Omeprazole	Anti-Inflammatory: Downregulation of the expression of several key mediators of inflammation including vascular cell adhesion protein 1 (VCAM-1), TNFα, IL-1β and NF-κB	Ghebremariam, Yohannes T et al. 2015. “Pleiotropic Effect of the Proton Pump Inhibitor Esomeprazole Leading to Suppression of Lung Inflammation and Fibrosis.” Journal of Translational Medicine 13(1): 249. http://www.translational-medicine.com/content/13/1/249 (November 16, 2020).	0.061149	0.01068	0.061502	0.005399	1.74529	0.052538	307	0	0.781884	0.024568	0.060798	0.021127	1.60939	0.496259	25	6	0.821368	0.074387
DB01029	Irbesartan	-1	0	YOSHYTLCDANDAN-UHFFFAOYSA-N	Benzene Derivatives/Biphenyl Compounds	Anti-Viral: Network proximity analysis shows a significant association between irbesartan’s targets and HCoV-associated host proteins in the human interactome. Irbesartan targets genes, encoding the sodium/bile acid cotransporter (NTCP) protein, which has been identified as a functional specific receptor for the hepatitis B virus (HBV) and the hepatitis delta virus (HDV). Irbesartan can inhibit N…	Zhou, Yadi et al. 2020. “Network-Based Drug Repurposing for Novel Coronavirus 2019-NCoV/SARS-CoV-2.” Cell Discovery 6(1): 14. http://www.nature.com/articles/s41421-020-0153-3 (November 16, 2020).	0.061174	0.011572	0.069014	0.004225	1.72639	0.029006	229	0	0.763331	0.023749	0.054225	0.03169	1.64212	0.653951	188	41	0.830949	0.117232
BRD-A61899133	catechin	0	0	PFTAWBLQPZVEMU-UHFFFAOYSA-N	Benzopyrans/Chromans	Anti-SARS-CoV-2: Inhibition of SARS 3CLPro activity	Chen, Chia-Nan et al. 2005. “Inhibition of SARS-CoV 3C-like Protease Activity by Theaflavin-3,3’-Digallate (TF3).” Evidence-based complementary and alternative medicine : eCAM 2(2): 209–15. http://www.ncbi.nlm.nih.gov/pubmed/15937562 (November 16, 2020).	0.061249	0.004379	0.053991	0.000939	1.92553	0.171407	159	0	0.812382	0.003498	0.069484	0.020423	1.57779	0.370256	25	10	0.792638	0.05935
DB01088	Iloprost	-1	0	HIFJCPQKFCZDDL-ACWOEMLNSA-N	Inflammation Mediators/Prostaglandins, Synthetic	Anti-COVID: Iloprost is antithrombotic, anti-inflammatory, and anti-fibrotic, exerting these effects via inhibition of platelet activation and suppression of IL-6 and TNF production. By restoring healthy endothelial function, iloprost might minimise the lung damage and thrombotic complications seen in COVID-19	Moezinia, Carine J et al. 2020. “Iloprost for COVID-19-Related Vasculopathy.” The Lancet Rheumatology 2(10): e582–83. http://www.ncbi.nlm.nih.gov/pubmed/32838311 (November 16, 2020).	0.06154	0.011605	0.056808	0.006103	1.88387	0.005733	150	0	0.804149	0.018189	0.066667	0.022066	1.60412	0.311381	25	5	0.804465	0.058408
FDB022106	4-Phenylbutanoic acid	0	0	OBKXEAXTFZPCHS-UHFFFAOYSA-N	Phenylbutyrate/Supplementary Records	Anti-Viral: Inhibitor of human immunodeficiency virus (HIV) protease	Komai, Tomoaki et al. 2002. “In Vitro and Ex Vivo Anti-Human Immunodeficiency Virus (HIV) Activities of a New Water-Soluble HIV Protease Inhibitor, R-87366, Containing (2S, 3S)-3-Amino-2-Hydroxy-4-Phenylbutanoic Acid.” Chemical Pharmaceutical Bulletin (43): 2091. http://www.mendeley.com/research/geology-volcanic-history-eruptive-style-yakedake-volcano-group-central-japan/.	0.062506	0.009959	0.071127	0.008451	1.61987	0.167144	310	0	0.769375	0.00977	0.05493	0.011737	1.90844	0.274873	25	10	0.840701	0.041852
DB00281	Lidocaine	-1	0	NNJVILVZKWQKPM-UHFFFAOYSA-N	Anilides/Acetanilides	Anti-COVID: Inhalational doses of lidocaine have immunoregulatory effects on T cells with allergic asthma by directly inhibiting cytokine production and the proliferative response through blockade of Ca2+ and Na+ channels. This may have efficacy in attenuating the COVID-19 cytokine storm	Tanaka, Akihiko et al. 2002. “Inhibitory Effect of Lidocaine on T Cells from Patients with Allergic Asthma.” The Journal of allergy and clinical immunology 109(3): 485–90. http://www.ncbi.nlm.nih.gov/pubmed/11897996 (November 16, 2020).	0.06264	0.008864	0.060563	0.005399	1.74826	0.071106	300	0	0.78727	0.020005	0.064789	0.014554	1.72787	0.270752	26	5	0.809414	0.036317
DB00630	Alendronic acid	-1	0	OGSPWJRAVKPPFI-UHFFFAOYSA-N	Organophosphonates/Diphosphonates	N/A	N/A	0.06296	0.008625	0.065962	0.002113	1.75451	0.025132	143	0	0.770761	0.01106	0.060094	0.035211	1.74714	0.670324	25	10	0.820527	0.112804
DB00570	Vinblastine	-1	1	JXLYSJRDGCGARV-CFWMRBGOSA-N	Secologanin Tryptamine Alkaloids/Vinca Alkaloids	Anti-Viral: Vinblastine (inhibitor of tubulin polymerization) was shown to hinder retrograde axonal transport of poliomyelitis virus when applied topically to infected peripheral nerve	Fenrich, Matija et al. 2020. “SARS-CoV-2 Dissemination Through Peripheral Nerves Explains Multiple Organ Injury.” Frontiers in Cellular Neuroscience 14: 229. https://www.frontiersin.org/article/10.3389/fncel.2020.00229/full (November 16, 2020).	0.063385	0.007147	0.043662	0.002113	2.12779	0.145758	306	0	0.853802	0.00374	0.092019	0.024178	1.40375	0.265061	25	10	0.721778	0.057846
DB00227	Lovastatin	-1	0	PCZOHLXUXFIOCF-BXMDZJJMSA-N	Polycyclic Aromatic Hydrocarbons/Naphthalenes	Anti-SARS-CoV-2: Lovastatin is predicted to target Mpro	Reiner, Željko et al. 2020. “Statins and the COVID-19 Main Protease: In Silico Evidence on Direct Interaction.” Archives of medical science : AMS 16(3): 490–96. http://www.ncbi.nlm.nih.gov/pubmed/32399094 (November 16, 2020).	0.064316	0.012554	0.046009	0.003052	2.08225	0.023497	302	0	0.845191	0.016521	0.089906	0.051643	1.26853	0.441306	25	10	0.720869	0.143562
DB11217	Arbutin	-1	0	BJRNKVDFDLYUGJ-RMPHRYRLSA-N	Carbohydrates/Glycosides	Anti-SARS-CoV-2: Arbutin is predicted to target Mpro	Baby, Krishnaprasad et al. 2020. “Targeting SARS-CoV-2 Main Protease: A Computational Drug Repurposing Study.” Archives of Medical Research. https://www.sciencedirect.com/science/article/pii/S0188440920309577 (November 16, 2020).	0.064875	0.01377	0.078638	0.007277	1.62639	0.016913	301	0	0.735577	0.033441	0.053521	0.026056	1.75362	0.428106	198	0	0.837012	0.074975
DB04398	Lactic Acid	-1	0	JVTAAEKCZFNVCJ-UHFFFAOYSA-N	Hydroxy Acids/Lactates	Anti-Viral: Lactic acid leads to the inactivation of the human HIV-1 and human simplex virus type 2 (HSV-2)	Tiwari, Santosh Kumar et al. 2020. “Probiotics at War Against Viruses: What Is Missing From the Picture?” Frontiers in microbiology 11: 1877. http://www.ncbi.nlm.nih.gov/pubmed/32973697 (November 16, 2020).	0.064882	0.012379	0.066667	0.006338	1.80731	0.014362	300	0	0.770822	0.017018	0.063146	0.024178	1.76334	0.35591	25	10	0.816383	0.063623
DB01599	Probucol	-1	0	FYPMFJGVHOHGLL-UHFFFAOYSA-N	Benzene Derivatives/Phenols	Anti-SARS-CoV-2: Antagonist of the TMPRSS2 receptor	Balmeh, Negar, Samira Mahmoudi, Niloofar Mohammadi, and Anasik Karabedianhajiabadi. 2020. “Predicted Therapeutic Targets for COVID-19 Disease by Inhibiting SARS-CoV-2 and Its Related Receptors.” Informatics in Medicine Unlocked 20: 100407. https://www.sciencedirect.com/science/article/pii/S2352914820305578 (November 16, 2020).	0.066955	0.014757	0.069953	0.00892	1.72014	0.044327	148	0	0.761657	0.024783	0.064085	0.024413	1.46009	0.412034	25	10	0.797851	0.075833
DB05521	Telaprevir	-1	0	BBAWEDCPNXPBQM-GDEBMMAJSA-N	Peptides/Oligopeptides	Anti-SARS-CoV-2: Inhibition of the catalytic residues of the viral 3C-like protease (3CLpro)	Elzupir, Amin O. 2020. “Inhibition of SARS-CoV-2 Main Protease 3CLpro by Means of α-Ketoamide and Pyridone-Containing Pharmaceuticals Using in Silico Molecular Docking.” Journal of Molecular Structure 1222: 128878. https://www.sciencedirect.com/science/article/pii/S0022286020312035 (November 16, 2020).	0.067039	0.014808	0.089202	0.007277	1.47481	0.023012	94	0	0.689743	0.001645	0.050382	0.030134	1.6189	0.412533	26	11	0.839415	0.092419
DB06803	Niclosamide	0	0	RJMUSRYZPJIFPJ-UHFFFAOYSA-N	Anilide/Salicylanilides	Anti-SARS-CoV-2: Niclosamide may have inhibitory effects on ACE2. Niclosamide can prevent autophagy of SARS-CoV-2 by inhibition of S-Phase kinase associated protein 2 (SKP2)	Pindiprolu, Sai Kiran S.S., and Sai Harshini Pindiprolu. 2020. “Plausible Mechanisms of Niclosamide as an Antiviral Agent against COVID-19.” Medical Hypotheses 140: 109765. https://www.sciencedirect.com/science/article/pii/S0306987720305892?casa_token=a1X5riANV2oAAAAA:kgH1Zez24Ybhrq9iW0dGGlaVNC2z65PTrxYzHghhzyMTKJR1O7Me_lW-cztUSXQ1CzretCaXLA (November 16, 2020).	0.067167	0.008836	0.070657	0.003052	1.71868	0.067207	217	0	0.761184	7.88e-05	0.06385	0.025587	1.77029	0.543269	25	7	0.807784	0.102431
DB05260	Gallium nitrate	-1	0	CHPZKNULDCNCBW-UHFFFAOYSA-N	Metals, Heavy/Gallium	Anti-Inflammatory: Gallium nitrate inhibits the release of the inflammatory mediators IL-6, TNF-α, and nitric oxide in vitro	Eby, George. 2005. “Elimination of Arthritis Pain and Inflammation for over 2 Years with a Single 90 Min, Topical 14% Gallium Nitrate Treatment: Case Reports and Review of Actions of Gallium III.” Medical Hypotheses 65(6): 1136–41. https://www.sciencedirect.com/science/article/pii/S0306987705003452?via%3Dihub (November 16, 2020).	0.067904	0.008635	0.070657	0.002582	1.71633	0.109498	67	0	0.76063	0.004618	0.065258	0.028873	1.68854	0.524931	18	7	0.800216	0.109884
DB00836	Loperamide	0	0	RDOIQAHITMMDAJ-UHFFFAOYSA-N	Heterocyclic Compounds, 1-Ring/Piperidines	Anti-SARS-CoV-2: Inhibition of coronaviral infection, in vitro studies demonstrate impaired production of progeny following treatment with loperamide	Hoagland, Daisy A et al. “Modulating the Transcriptional Landscape of SARS-CoV-2 as an Effective Method for Developing Antiviral Compounds.” https://doi.org/10.1101/2020.07.12.199687 (November 16, 2020).	0.06912	0.018192	0.073474	0.021362	1.67475	0.101026	300	0	0.749256	0.055736	0.065023	0.015493	1.51968	0.365595	25	10	0.79899	0.050129
DB00468	Quinine	-1	0	LOUPRKONTZGTKE-WZBLMQSHSA-N	Alkaloids/Cinchona Alkaloids	Anti-SARS-CoV-2: Demonstrated strong affinity for the ACE-2 receptor, hence potentially blocking viral entry into host cells	Lestari, Keri, Trully Sitorus, Sandra Megantara, and Jutti Levita. 2020. Molecular Docking of Quinine, Chloroquine and Hydroxychloroquine to Angiotensin Converting Enzyme 2 (ACE2) Receptor for Discovering New Potential COVID-19 Antidote. www.japer.in (November 16, 2020).	0.069229	0.015857	0.083333	0.009155	1.58038	0.056458	300	0	0.722131	0.025634	0.057512	0.027465	1.69983	0.42032	198	0	0.827445	0.080728
DB00178	Ramipril	-1	0	HDACQVRGBOVJII-JBDAPHQKSA-N	Heterocyclic Compounds, Fused-Ring/Heterocyclic Compounds, 2-Ring	Anti-SARS-CoV-2: Ramipril binds with ACE2 receptor and the SARS-CoV-2/ACE2 complex	Liu, Xiaoyan et al. 2020. “Potential Therapeutic Effects of Dipyridamole in the Severely Ill Patients with COVID-19.” Acta Pharmaceutica Sinica B 10(7): 1205–15. https://www.sciencedirect.com/science/article/pii/S2211383520305529 (November 16, 2020).	0.070889	0.01776	0.071596	0.012676	1.70428	0.18013	118	0	0.75737	0.019467	0.070188	0.024883	1.57143	0.366837	45	29	0.793115	0.071532
DB00050	Cetrorelix	-1	0	SBNPWPIBESPSIF-MHWMIDJBSA-N	Hypothalamic Hormones/Pituitary Hormone-Releasing Hormones	Anti-SARS-CoV-2: Binding to the RNA tunnel of RdRp, a critical component of viral replication	Pokhrel, Rudramani, Prem Chapagain, and Jessica Siltberg-Liberles. 2020. “Potential RNA-Dependent RNA Polymerase Inhibitors as Prospective Therapeutics against SARS-CoV-2.” Journal of Medical Microbiology 69(6): 864–73. https://www.microbiologyresearch.org/content/journal/jmm/10.1099/jmm.0.001203 (November 16, 2020).	0.073463	0.012075	0.097418	0.004225	1.44579	0.010325	77	0	0.706384	0.025901	0.055399	0.034507	1.88567	0.882406	25	10	0.847739	0.110392
DB00975	Dipyridamole	-1	0	IZEKFCXSFNUWAM-UHFFFAOYSA-N	Heterocyclic Compounds, 1-Ring/Pyrimidines	Anti-Viral/Anti-Inflammatory: Dipyridamole (DIP) has a broad spectrum antiviral activity, with particular efficacy against the positive-stranded RNA viruses. Suppresses inflammation and promotes mucosal healing.	Liu, Xiaoyan et al. 2020. “Potential Therapeutic Effects of Dipyridamole in the Severely Ill Patients with COVID-19.” Acta Pharmaceutica Sinica B 10(7): 1205–15. https://www.sciencedirect.com/science/article/pii/S2211383520305529 (November 16, 2020).	0.077393	0.006259	0.091784	0.002113	1.482	0.053902	221	0	0.695702	0.013039	0.065258	0.018545	1.79144	0.308403	25	10	0.804934	0.068694
DB00843	Donepezil	-1	0	ADEBPBSSDYVVLD-UHFFFAOYSA-N	Indenes/Indans	Anti-Viral/Anti-Inflammatory: Donepezil inhibits VSV replication in the leukocytes. The production of TNF-α and IFNs was reduced in infected leukocytes. NFκB activation was also reduced by donepezil	Sochocka, Marta et al. 2008. “Effect of Donepezil on Innate Antiviral Immunity of Human Leukocytes.” Journal of the Neurological Sciences 273(1–2): 75–80. https://www.sciencedirect.com/science/article/pii/S0022510X08003092?casa_token=2qfiuNWZOsgAAAAA:RxPDVfc2tG8uTQky_FtkZ-ltpeXzP1GfQ5kkLAyYq09pDTGyM81QKjq_SgwF0BsLR5YscSx8XA (November 16, 2020).	0.084233	0.012421	0.086854	0.003286	1.55978	0.06967	131	0	0.715978	0.03169	0.08169	0.046948	1.32955	0.62952	36	21	0.7663	0.149546
DB01006	Letrozole	-1	1	HPJKCIUCZWXJDR-UHFFFAOYSA-N	Organic Chemicals/Nitriles	N/A	N/A	0.085322	0.008091	0.084272	0.001408	1.56628	8.12e-05	114	0	0.71795	0.012613	0.086385	0.046479	1.32231	0.401146	25	10	0.735524	0.147685
DB01037	Selegiline	-1	0	MEZLKOACVSPNER-GFCCVEGCSA-N	Ethylamines/Phenethylamines	Anti-Inflammatory: Selegiline fully reversed the cigarette smoke-induced effects on IKK, cytoplasmic IκB expression, and nuclear translocation of nuclear factor-κB (NF-κB) p65 subunit	Cui, Yuting et al. 2017. “Inhibition of Monoamine Oxidase-B by Selegiline Reduces Cigarette Smoke-Induced Oxidative Stress and Inflammation in Airway Epithelial Cells.” Toxicology Letters 268: 44–50. https://www.sciencedirect.com/science/article/pii/S037842741730005X?casa_token=2BI9F5tvK2cAAAAA:Ql2CKxwGAaIBpCu-Hiq0aBzD9nmQeEFa0skO6rYXWh3F12TyeNMzm-jH7qcfwMOZTuwSRjLLYg (November 16, 2020).	0.086451	0.017666	0.077465	0.011268	1.63692	0.013333	247	0	0.738597	0.020535	0.096479	0.027699	1.26482	0.24513	25	10	0.71086	0.063918
DB01576	Dextroamphetamine	-1	0	KWTSXDURSIMDCE-QMMMGPOBSA-N	Phenethylamines/Amphetamine	Pro-Inflammatory: Dextroamphetamine administration increased cytokine levels (IL‐4, IL‐6, IL‐10, and TNF‐α) in the frontal cortex, striatum, and serum in vivo	Valvassori, Samira S et al. 2015. “Lithium Modulates the Production of Peripheral and Cerebral Cytokines in an Animal Model of Mania Induced by Dextroamphetamine.” Bipolar Disorders 17(5): 507–17. http://doi.wiley.com/10.1111/bdi.12299 (November 16, 2020).	0.090801	0.033626	0.088028	0.028169	1.55662	0.142735	301	0	0.715024	0.0784	0.093662	0.040141	1.28165	0.416066	25	10	0.737405	0.100004
DB00207	Azithromycin	0	0	MQTOSJVFKKJCRP-BICOPXKESA-N	Macrolides/Erythromycin	Anti-Bacterial: Inhibits protein synthesis by binding to the 50S subunit of the bacterial ribosome	Parnham, Michael J et al. 2014. “Azithromycin: Mechanisms of Action and Their Relevance for Clinical Applications.” Pharmacology & therapeutics 143(2): 225–45. http://www.ncbi.nlm.nih.gov/pubmed/24631273 (November 16, 2020).	0.094596	0.019151	0.093662	0.007512	1.4558	0.109507	270	0	0.717635	0.003832	0.09554	0.048826	1.34424	0.56274	30	15	0.729431	0.126414
Experimental drugs and compounds
ID	Name	Target_Label	Anti-cancer	InChIKey	Class (Class/Subclass)	Mechanism	Reference	GeoMean(r_vals(neg)_median)	GeoMean(r_vals(neg)_MAD)	wiki_r_vals(neg)_median	wiki_r_vals(neg)_MAD	wiki_Normalized_correlation_median	wiki_Normalized_correlation_MAD	wiki_Gene_connection_counts_median	wiki_Gene_connection_counts_MAD	wiki_Probability_estimate_median	wiki_Probability_estimate_MAD	aggr_r_vals(neg)_median	aggr_r_vals(neg)_MAD	aggr_Normalized_correlation_median	aggr_Normalized_correlation_MAD	aggr_Gene_connection_counts_median	aggr_Gene_connection_counts_MAD	aggr_Probability_estimate_median	aggr_Probability_estimate_MAD
BRD-A37704979	SB-203580	0	0	CDMGBJANTYXAIV-UHFFFAOYSA-N	Azoles/Imidazoles	Transcription factors in p38/Mitogen-activated protein kinase (MAPK) pathway were most affected by SARS-Cov-2 infection. - this p38 MAPK inhibitor has shown success in SARS-CoV-2 study, mechanism of decreasing the mRNA of inflammatory cytokines.	Bouhaddou, Mehdi et al. 2020. “The Global Phosphorylation Landscape of SARS-CoV-2 Infection.” Cell 182: 685-712.e19. https://doi.org/10.1016/j.cell.2020.06.034 (November 16, 2020).	0.001818	0.000996	0.001408	0.000469	4.26213	1.24316	340	0	0.992765	0.005073	0.002347	0.002113	4.33662	1.58224	25	10	0.99532	0.004434
BRD-K62810658	PD-98059	0	0	QFWCYNPOPKQOKV-UHFFFAOYSA-N	Flavonoids/O-methylated flavonoids	A mitogen-activated protein kinase kinase (MEK) inhibitor. Differentially expressed gene (DEG) analysis of SARS-CoV-2 has identified MEK inhibitors as the most represented drug category to counteract transcriptional changes occurring during SARS-CoV-2 infection.	Fagone, Paolo et al. 2020. “Transcriptional Landscape of SARS-CoV-2 Infection Dismantles Pathogenic Pathways Activated by the Virus, Proposes Unique Sex-Specific Differences and Predicts Tailored Therapeutic Strategies.” Autoimmunity Reviews 19(7): 102571. https://www.sciencedirect.com/science/article/pii/S1568997220301336?casa_token=cQfSnCX1NjgAAAAA:D9siIhcF_Bn3H_lL11XRWSJE3fmG9jbAzbPZ7wRHZMQAcn…	0.001818	0	0.003521	0	3.81223	0.770666	302	0	0.986022	0.005864	0.000939	0.000704	5.00235	1.37914	25	10	0.997944	0.00194
BRD-K36055864	cycloheximide	0	0	YPHMISFOHDHNIV-FSZOTQKASA-N	Pyridines and derivatives/Hydropyridines	Cycloheximide is an inhibitor of translation elongation, it is hypothesised that it would inhibit viral replication and this effect has been shown to be concentration dependent.	Bojkova, Denisa et al. 2020. “Proteomics of SARS-CoV-2-Infected Host Cells Reveals Therapy Targets.” Nature 583(7816): 469–72. http://www.nature.com/articles/s41586-020-2332-7 (November 16, 2020).	0.002033	0	0.003521	0	3.82262	0.677674	307	0	0.986232	0.00474	0.001174	0.000939	4.88046	1.07791	25	10	0.997911	0.001832
DB02656	LY-294002	-1	0	CZQHHVNHHHRRDU-UHFFFAOYSA-N	Benzopyrans/1-benzopyrans	phosphatidylinositol 3-kinase/protein kinase B (PI3K/Akt) inhibitor. It is suggested that the PI3K/Akt pathway is vital to initiate infection in cells, and inhibition of this has been demonstrated to inhibit proliferation of SARS-CoV virus.	Hemmat, Nima et al. 2020. “The Alterations of Cellular Signaling Pathways in the Host Cell upon the High Pathogenic Coronaviruses Infection, SARS-CoV and MERS-CoV. What Could Be Expected from the SARS-CoV-2?” https://www.preprints.org/manuscript/202009.0489/v1 (November 16, 2020).	0.002113	0	0.000235	0	4.81365	1.21165	301	0	0.996787	0.001968	0.019014	0.013615	2.58137	0.480542	25	10	0.947475	0.035584
BRD-K05396879	15-delta-prostaglandin-j2	0	0	VHRUMKCAEVRUBK-GODQJPCRSA-N	Fatty Acyls/Eicosanoids	15d-PGJ2 has anti-inflammatory effects, including inhibition of nuclear factor kappa-light-chain-enhancer of activated B cells (NFᴋB) action, inhibitor of nuclear factor kappa B (IᴋB) kinase inhibition and activation of peroxisome proliferator-activated receptor gamma (PPAR-γ). 15d-PGJ2 has also been demonstrated to inhibited secretion of cytokines central to COVID-19 hyperinflammatory response (…	Shahzad, Shakeel, and Mark Willcox. 2020. “Immuno-Pathogenesis of NCOVID-19 and a Possible Host-Directed Therapy Including Anti-Inflammatory and Anti-Viral Prostaglandin (PG J2) for Effective Treatment and Reduction in the Death Toll.” Medical Hypotheses 143: 110080. https://www.sciencedirect.com/science/article/pii/S0306987720319265?casa_token=3gQEPwrc9MgAAAAA:Fe2ZsWn6mrgDx7V2i99c-kkiTvKjIhIj4n9…	0.00397	0.00105	0.006103	0.000469	3.50013	0.422791	279	0	0.978002	0.003024	0.002582	0.002347	4.01892	1.45826	25	10	0.993701	0.005971
BRD-K15025317	BAY-11-7082	0	0	DOEWDSDBFRHVAP-KRXBUXKQSA-N	Benzene and substituted derivatives/Toluenes	NF-κB inhibitor which may decrease infection associated inflammation.	DeDiego, Marta L et al. 2014. “Inhibition of NF-ΚB-Mediated Inflammation in Severe Acute Respiratory Syndrome Coronavirus-Infected Mice Increases Survival.” Journal of virology 88(2): 913–24. http://www.ncbi.nlm.nih.gov/pubmed/24198408 (November 16, 2020).	0.004392	0.001242	0.003286	0.000469	3.81005	0.569334	96	0	0.985977	0.002634	0.005869	0.003286	3.70963	0.397173	25	10	0.988492	0.006978
FDB010963	4,5-Dimethylthiazole	0	0	UWSONZCNXUSTKW-UHFFFAOYSA-N	Azoles/Thiazoles	N/A	N/A	0.004671	0.001878	0.002113	0.000469	4.09626	1.04708	301	0	0.990772	0.005304	0.010329	0.007512	2.95682	0.996963	29	14	0.969108	0.023568
BRD-K18787491	U-0126	0	0	DVEXZJFMOKTQEZ-JYFOCSDGSA-N	Thioethers/Aryl thioethers	Highly selective inhibitor of both MEK1 and MEK2, with potential to inhibit Rapidly Accelerated Fibrosarcoma/MEK/extracellular signal-regulated kinases (Raf/MEK/ERK) pathway activation by SARS-CoV-2	Ghasemnejad-Berenji, Morteza, and Sarvin Pashapour. 2020. “SARS-CoV-2 and the Possible Role of Raf/MEK/ERK Pathway in Viral Survival: Is This a Potential Therapeutic Strategy for COVID-19?” Pharmacology: 1–3. http://www.ncbi.nlm.nih.gov/pubmed/33011728 (November 16, 2020).	0.005143	0.0023	0.004695	0.001408	3.64801	0.96301	322	0	0.982247	0.009929	0.005634	0.003756	3.67219	1.07204	25	10	0.985134	0.012839
DB02166	Propidium	-1	0	ZDWVWKDAWBGPDN-UHFFFAOYSA-O	Quinolines and derivatives/Phenylquinolines	A DNA Intercalator also reported to inhibits cholinesterase. An association between cholinesterase and COVID-19 severity has been reported along with the possible negative effect of cholinesterase inhibition as low levels were associated with severe disease.	Nakajima, Kento et al. 2020. “Serum Cholinesterase Associated with COVID-19 Pneumonia Severity and Mortality.” https://doi.org/10.1016/j.jinf.2020.08.021 (November 16, 2020).	0.00541	0.002145	0.001408	0.000235	4.21948	0.998073	300	0	0.992298	0.004139	0.020777	0.019603	2.01694	0.723924	26	11	0.913392	0.074746
BRD-K68552125	phorbol-myristate-acetate	0	0	PHEDXBVPIONUQT-RGYGYFBISA-N	Prenol lipids/Diterpenoids	N/A	N/A	0.005892	0	0.003286	0	3.9029	0.730803	304	0	0.987755	0.004648	0.010563	0.005399	3.0216	0.715752	26	11	0.974186	0.016979
FDB019972	Disodium inosinate	0	0	GRSZFWQUAKGDAV-UHFFFAOYSA-N	Purine nucleotides/Purine ribonucleotides	N/A	N/A	0.006706	0.001485	0.031925	0.001878	2.32826	0.187538	77	0	0.887079	0.006528	0.001408	0.001174	4.48097	1.5709	26	11	0.996712	0.003141
DB05076	Fenretinide	-1	0	AKJHMTWEGVYYSE-FXILSDISSA-N	Prenol lipids/Retinoids	Synthetic analogue of retinol (vitamin A) that binds retinoic acid receptors (RARs) with beneficial anti-inflammatory and immunomodulatory properties.	National Center for Biotechnology Information. "PubChem Compound Summary for CID 5288209, Fenretinide" PubChem, https://pubchem.ncbi.nlm.nih.gov/compound/Fenretinide. Accessed 16 November, 2020 ; ﻿Orienti, Isabella, Giovanna Angela Gentilomi, and Giovanna Farruggia. 2020. “Pulmonary Delivery of Fenretinide: A Possible Adjuvant Treatment in COVID-19.” International Journal of Molecular Sciences 21…	0.007163	0.00206	0.001643	0.000235	4.16246	0.682606	302	0	0.991626	0.002596	0.031221	0.018075	2.32221	0.36371	35	18	0.914967	0.042925
BRD-K47105409	AG-490	0	0	TUCIOBMMDDOEMM-RIYZIHGNSA-N	Cinnamic acids and derivatives/Hydroxycinnamic acids and derivatives	Janus kinase-2/-3 (JAK2/3) inhibitor and Signal transducer and activator of transcription 3 (STAT3) inhibitor. JAK inhibition has been suggested as a possible COVID-19 therapeutic strategy.	Wang, L H et al. “JAK3, STAT, and MAPK signaling pathways as novel molecular targets for the tyrphostin AG-490 regulation of IL-2-mediated T cell response.” Journal of immunology (Baltimore, Md. : 1950) vol. 162,7 (1999): 3897-904 ; ﻿Seif, Farhad et al. 2020. “JAK Inhibition as a New Treatment Strategy for Patients with COVID-19.” International Archives of Allergy and Immunology 181(6): 467–75. h…	0.00847	0.000909	0.009859	0.000235	3.22432	0.418461	138	0	0.967283	0.002606	0.007277	0.003521	3.35087	0.627065	30	15	0.983151	0.010231
FDB016181	Polysorbate 40	0	0	HMFKFHLTUCJZJO-UHFFFAOYSA-N	Fatty Acyls/Fatty acid esters	N/A	N/A	0.009031	0.002717	0.002347	0.000235	4.08228	0.947778	302	0	0.990581	0.004873	0.034742	0.031455	1.8616	0.683966	26	10	0.897412	0.093995
FDB012992	meso-Pristane	0	0	XOJVVFBFDXDTEG-UHFFFAOYSA-N	Prenol lipids/Diterpenoids	Possibly negative: induces macrophage activation and increases interleukin-6 (IL-6) levels amongst other effects.	Quiros Roldan, Eugenia, Giorgio Biasiotto, Paola Magro, and Isabella Zanella. 2020. “The Possible Mechanisms of Action of 4-Aminoquinolines (Chloroquine/Hydroxychloroquine) against Sars-Cov-2 Infection (COVID-19): A Role for Iron Homeostasis?” Pharmacological Research 158: 104904. https://www.sciencedirect.com/science/article/pii/S1043661820312123?casa_token=5H_1cbwWyY0AAAAA:1iNkdhX8Wz1iNBKibO0Vy…	0.009079	0.001992	0.010329	0.000939	3.20458	0.268348	159	0	0.966346	4.58e-05	0.007981	0.004225	3.3531	0.690186	25	10	0.982682	0.01221
DB01782	2,6-Dihydroanthra/1,9-Cd/Pyrazol-6-One	-1	0	ACPOUJIDANTYHO-UHFFFAOYSA-N	Anthracenes/NA	c-Jun N-terminal kinase (JNK) inhibitor acting by interfering with phosphorylation of c-JUN.	Valesio, Eric G, Honghong Zhang, and Chunbo Zhang. 2013. “Exposure to the JNK Inhibitor SP600125 (Anthrapyrazolone) during Early Zebrafish Development Results in Morphological Defects.” Journal of applied toxicology : JAT 33(1): 32–40. http://www.ncbi.nlm.nih.gov/pubmed/21751222 (November 16, 2020).	0.009272	0.001788	0.002817	0.000235	3.99787	0.813801	300	0	0.989342	0.004624	0.030516	0.013615	2.33248	0.424885	25	10	0.919474	0.045223
DB00197	Troglitazone	-1	0	GXPHKUHSUJUWKP-UHFFFAOYSA-N	Benzopyrans/1-benzopyrans	Predicted to bind ACE2 receptor, interfering with SARS-CoV-2 binding.	Wu, Canrong et al. 2020. “Analysis of Therapeutic Targets for SARS-CoV-2 and Discovery of Potential Drugs by Computational Methods.” Acta pharmaceutica Sinica. B 10(5): 766–88. http://www.ncbi.nlm.nih.gov/pubmed/32292689 (November 16, 2020).	0.009965	0.002033	0.007981	0.000704	3.3108	0.409631	308	0	0.971098	0.004336	0.012441	0.005869	2.99458	0.556558	25	10	0.968823	0.016652
FDB022889	Peroxynitrite	0	0	CMFNMSMUKZHDEY-UHFFFAOYSA-M	Non-metal oxoanionic compounds/Non-metal peroxynitrites	Possibly Negative: Hypoxia in COVID-19 generates hydrogen peroxide (H2O2), which triggers expression of pro-inflammatory genes (IL-6, tumor necrosis factor alpha (TNFα) and IL-1) that in turn produce further superoxides. Superoxides react with NO and yield peroxynitrite. Peroxynitrite is toxic to mitochondria - this may link to inability of oxygen utilization in patients. Therefore it is unlikely…	Cecchini, Rubens, and Alessandra Lourenço Cecchini. 2020. “SARS-CoV-2 Infection Pathogenesis Is Related to Oxidative Stress as a Response to Aggression.” Medical Hypotheses 143: 110102. https://www.sciencedirect.com/science/article/pii/S0306987720317540?casa_token=z3aOYHhylN4AAAAA:C98JZ36VRUhhcDTsX27or-rlSBuoASxWV-w8KV6UFSoOtVyiRLn_sIWoeQKEYAVoUVOtrI2ZHQ (November 16, 2020).	0.010829	0.002382	0.003756	0.000235	3.79806	0.782371	300	0	0.98573	0.00613	0.031221	0.024178	2.31416	0.591719	25	10	0.920651	0.059823
FDB021120	Globotriose	0	0	FYGDTMLNYKFZSV-UHFFFAOYSA-N	Organooxygen compounds/Carbohydrates and carbohydrate conjugates	N/A	N/A	0.010835	0.00376	0.00446	0.000939	3.70241	0.404793	300	0	0.983597	0.001421	0.026323	0.015056	2.27131	0.651634	25	9	0.920341	0.047448
BRD-K03816923	rottlerin	0	0	DEZFNHCVIZBHBI-ZHACJKMWSA-N	Diarylheptanoids/Linear diarylheptanoids	Pan cyclic nucleotide phosphodiesterases (PDE) inhibitor. Possibility to improve vascularisation and combat fibrotic symptoms of COVID-19.	﻿Dar, Mohd Ishaq et al. 2019. “Rottlerin Is a Pan Phosphodiesterase Inhibitor and Can Induce Neurodifferentiation in IMR-32 Human Neuroblastoma Cells.” European journal of pharmacology 857: 172448. http://www.ncbi.nlm.nih.gov/pubmed/31202802 (November 16, 2020) ; ﻿Mondaini, Nicola. 2020. “Phosphodiesterase Type 5 Inhibitors and COVID-19: Are They Useful In Disease Management?” The world journal o…	0.010864	0.001264	0.009859	0.000235	3.22784	0.446563	232	0	0.967448	0.004399	0.011972	0.006808	3.31958	0.882876	28	11	0.97286	0.021251
DB09201	Ciglitazone	-1	0	YZFWTZACSRHJQD-UHFFFAOYSA-N	Phenol ethers/NA	Ciglitazone is a PPAR-γ agonist.These agents are of interest for the modulation of the COVID-19 cytokine storm.	﻿Ciavarella, Carmen, Ilenia Motta, Sabrina Valente, and Gianandrea Pasquinelli. 2020. “Pharmacological (or Synthetic) and Nutritional Agonists of PPAR-γ as Candidates for Cytokine Storm Modulation in COVID-19 Disease.” Molecules (Basel, Switzerland) 25(9). http://www.ncbi.nlm.nih.gov/pubmed/32365556 (November 16, 2020) ; ﻿Cheon, Chan Woo et al. 2009. “Effects of Ciglitazone and Troglitazone on th…	0.011093	0.00166	0.018075	0.001174	2.75289	0.23166	159	0	0.936393	0.001922	0.006808	0.002347	3.39805	0.688596	28	10	0.983424	0.010913
FDB028898	Methylarsonite	0	0	OXBIRPQQKCQWGV-UHFFFAOYSA-N	Organometalloid compounds/Organoarsenic compounds	N/A	N/A	0.011926	0.004689	0.006808	0.001643	3.55136	0.370529	630	0	0.979574	0.001427	0.020892	0.01338	2.6131	0.83073	27	0	0.948504	0.032475
FDB022989	Celastrol	0	0	KQJSQWZMSAGSHN-JJWQIEBTSA-N	Prenol lipids/Triterpenoids	Anti-inflammatory effect through suppression of NFκB signalling, and lung specific benefits in alleviating chronic obstructive pulmonary disease (COPD) via this anti-inflammatory mechanism.	Habtemariam, Solomon et al. 2020. “Should We Try the Antiinflammatory Natural Product, Celastrol, for COVID ‐19?” Phytotherapy Research 34(6): 1189–90. https://onlinelibrary.wiley.com/doi/abs/10.1002/ptr.6711 (November 16, 2020).	0.011951	0.005035	0.022535	0.005399	2.61556	0.594093	301	0	0.923168	0.030104	0.006338	0.004695	3.73951	1.0475	25	0	0.986463	0.010192
BRD-K21565985	xylazine	0	0	BPICBUSOMSTKRF-UHFFFAOYSA-N	Benzene and substituted derivatives/Xylenes	Xylazine is an α2 class of adrenergic receptor agonist and functions as antihypertensive drug. Antihypertensives may benefit COVID-19 patients due to disruption of vascular system by angiotensin system altered function during infection.	﻿Lemke, Kip A. 2004. “Perioperative Use of Selective Alpha-2 Agonists and Antagonists in Small Animals.” The Canadian veterinary journal = La revue veterinaire canadienne 45(6): 475–80. http://www.ncbi.nlm.nih.gov/pubmed/15283516 (November 16, 2020) ; ﻿Pinto-Sietsma, Sara-Joan et al. 2020. “Antihypertensive Drugs in COVID-19 Infection.” European Heart Journal - Cardiovascular Pharmacotherapy. htt…	0.012193	0.002758	0.00446	0.000469	3.69247	0.643216	316	0	0.983358	0.005477	0.033333	0.016197	2.31054	0.355199	32	16	0.923251	0.036656
DB05134	Tanespimycin	-1	0	AYUNIORJHRXIBJ-TXHRRWQRSA-N	Macrolactams/NA	Binds and inhibits heat shock protein 90 (HSP90). Expression profiling of SARS-CoV-2 infection identified HSP90 as a key target for inhibition.	﻿Emanuel, Wyler et al. 2020. “Bulk and Single-Cell Gene Expression Profiling of SARS-CoV-2 Infected Human Cell Lines Identifies Molecular Targets for Therapeutic Intervention.” bioRxiv: 2020.05.05.079194. https://www.biorxiv.org/content/10.1101/2020.05.05.079194v1 (November 16, 2020) ; ﻿Powers, Marissa V et al. 2013. “Mode of Cell Death Induced by the HSP90 Inhibitor 17-AAG (Tanespimycin) Is Depe…	0.012913	0.005475	0.020892	0.003991	2.68347	0.489622	223	0	0.929996	0.021105	0.007981	0.007512	3.3563	1.00428	28	12	0.982021	0.01657
FDB012057	Baicalein	0	0	FXNFHKRTJBSTCS-UHFFFAOYSA-N	Flavonoids/Flavones	Well reported antiviral activity (Influenza and Dengue virus), Baicalein has been shown to inhibit IL-6/-8 production in H5N1 model infections. Also reported to reduce virus induced caspase 3 cleavage.	Sithisarn, Patchima, Martin Michaelis, Manfred Schubert-Zsilavecz, and Jindrich Cinatl. 2013. “Differential Antiviral and Anti-Inflammatory Mechanisms of the Flavonoids Biochanin A and Baicalein in H5N1 Influenza A Virus-Infected Cells.” Antiviral Research 97(1): 41–48. https://www.sciencedirect.com/science/article/pii/S0166354212002343 (November 16, 2020).	0.013166	0.001676	0.028404	0.000704	2.38439	0.295543	154	0	0.895131	0.013648	0.006103	0.003991	3.35257	1.28355	29	14	0.983173	0.013928
FDB023165	Berberine	0	0	YBHILYKTIRIUTE-UHFFFAOYSA-N	Protoberberine alkaloids and derivatives/NA	Anti-inflammatory and antiviral activity. Berberine's main antiviral mechanism is achieved through downregulation of virus induced NFκB activation and blocking the degradation of the endogenous NFκB inhibitor, IκBα.	Warowicka, Alicja, Robert Nawrot, and Anna Goździcka-Józefiak. 2020. “Antiviral Activity of Berberine.” Archives of virology 165(9): 1935–45. http://www.ncbi.nlm.nih.gov/pubmed/32594322 (November 16, 2020).	0.013403	0.006334	0.038263	0.012207	2.2043	0.453405	359	0	0.867369	0.038165	0.004695	0.003286	3.63073	1.45973	25	10	0.98657	0.012389
BRD-K24630133	dichlorodiamine-platinum	0	0	DLBNRDWREIUHLD-UHFFFAOYSA-L	Transition metal salts/Transition metal chlorides	N/A		0.013417	0.004066	0.007746	0.001174	3.34211	0.610964	301	0	0.97237	0.009374	0.023239	0.014085	2.47138	0.467678	25	10	0.935503	0.038752
BRD-K92870997	pterostilbene	0	0	VLEUZFDZJKSGMX-ONEGZZNKSA-N	Stilbenes/NA	Potent inhibition of SARS-CoV-2 - actively interfere with the post-entry/prior release steps of virus replication cycle and has long lasting antiviral activity. Additionally, Pterostilbene has anti-inflammatory action and has been shown to inhibit cytokine induction of p38-Activating transcription factor 2 (ATF2) pathway.	﻿Paul, Shiby et al. 2009. “Anti-Inflammatory Action of Pterostilbene Is Mediated through the P38 Mitogen-Activated Protein Kinase Pathway in Colon Cancer Cells.” Cancer prevention research (Philadelphia, Pa.) 2(7): 650–57. http://www.ncbi.nlm.nih.gov/pubmed/19549798 (November 16, 2020) ; ﻿ter, B.M. Ellen et al. 2020. “Resveratrol And Pterostilbene Potently Inhibit SARS-CoV-2 Infection In Vitro.” …	0.01355	0.004199	0.015962	0.002347	2.75136	0.341093	99	0	0.936258	0.005014	0.011502	0.007512	3.04537	0.949551	25	3	0.964035	0.0289
DB04875	Pralnacasan	-1	0	CXAGHAZMQSCAKJ-WAHHBDPQSA-N	Carboxylic acids and derivatives/Amino acids, peptides, and analogues	A caspase-1 (ICE) inhibitor. Caspase-1 cleaves and causes maturation of pro-inflammatory cytokines including IL-1β and IL-18. In this way pralnacasan may have an anti-inflammatory effect.	﻿Shah, Adnan. 2020. “Novel Coronavirus-Induced NLRP3 Inflammasome Activation: A Potential Drug Target in the Treatment of COVID-19.” Frontiers in Immunology 11: 1021. https://www.frontiersin.org/article/10.3389/fimmu.2020.01021/full (November 16, 2020) ; ﻿Randle, John CR et al. 2001. “ICE/Caspase-1 Inhibitors as Novel Anti-Inflammatory Drugs.” Expert Opinion on Investigational Drugs 10(7): 1207–9…	0.014613	0.003637	0.036385	0.002347	2.23814	0.221037	22	0	0.873021	0.002118	0.005869	0.005634	3.58109	1.84242	15	4	0.985899	0.013713
DB02329	Carbenoxolone	-1	0	OBZHEBDUNPOCJG-WBXJDKIVSA-N	Prenol lipids/Triterpenoids	Range of anti-inflammatory effects: 1) suppresses differentiation of Th17 cells through inhibition of IL-23 expression 2) blocks endotoxin-induced protein kinase R (PKR) activation and high mobility group box 1 (HMGB1) release. Specifically, IL-23 inhibition of COVID-19 patients has given favourable clinical outcome.	﻿Wang, Catherine J, and Allison K Truong. 2020. “COVID-19 Infection on IL-23 Inhibition.” Dermatologic therapy: e13893. http://www.ncbi.nlm.nih.gov/pubmed/32584451 (November 16, 2020) ; ﻿Li, Wei, Jianhua Li, Andrew E. Sama, and Haichao Wang. 2013. “Carbenoxolone Blocks Endotoxin-Induced Protein Kinase R (PKR) Activation and High Mobility Group Box 1 (HMGB1) Release.” Molecular Medicine 19(1): 203…	0.015256	0.002264	0.010329	0.000704	3.20315	0.331274	306	0	0.966277	0.002624	0.022535	0.007277	2.55018	0.475075	28	13	0.935464	0.030654
FDB022383	Angiotensin II	0	0	CZGUSIXMZVURDU-JZXHSEFVSA-N	Carboxylic acids and derivatives/Amino acids, peptides, and analogues	Possible compound to treat COVID-19 induced vasodilatory shock caused by viral interference with ACE2 function and angiotensin pathway, by supplementing additional Angiopoietin-2 (Ang-2) that cannot be generated by ACE2 whilst occupied or prematurely 'recycled' due to occupation.	Chow, Jonathan H., Michael A. Mazzeffi, and Michael T. McCurdy. 2020. “Angiotensin II for the Treatment of COVID-19–Related Vasodilatory Shock.” Anesthesia & Analgesia 131(1): 102–5. https://journals.lww.com/10.1213/ANE.0000000000004825 (November 16, 2020).	0.01609	0.002347	0.012676	0.000469	3.0591	0.323533	301	0	0.958601	0.001386	0.020423	0.011737	2.35679	0.428752	25	9	0.924475	0.036791
FDB000749	Edetate trisodium	0	0	QZKRHPLGUJDVAR-UHFFFAOYSA-K	Carboxylic acids and derivatives/Tetracarboxylic acids and derivatives	As edetate trisodium (EDTA) decreases serum calcium, nebulised EDTA directs this change to the respiratory system. SARS-CoV-2 entry requires binding by calcium-dependent binding domains and cleavage by TMPRSS2 that is also calcium-dependent. Therefore, this provides rationale for how EDTA can reduce successful viral entry.	Cashman, Daniel P. 2020. “Why the Lower Reported Prevalence of Asthma in Patients Diagnosed with COVID-19 Validates Repurposing EDTA Solutions to Prevent and Manage Treat COVID-19 Disease.” Medical hypotheses 144: 110027. http://www.ncbi.nlm.nih.gov/pubmed/32758873 (November 16, 2020).	0.016813	0.0041	0.010563	0.001174	3.19511	0.501798	386	0	0.965888	0.0088	0.026761	0.014319	2.21432	0.584794	25	10	0.908511	0.054978
BRD-K63606607	bufalin	0	0	QEEBRPGZBVVINN-BMPKRDENSA-N	Steroids and steroid derivatives/Steroid lactones	Previously reported CoV inhibitor - cardiac glycosides that inhibit the Na+/K+-adenosine triphosphatase (ATPase). Successfully showed inhibitory effect in cell based screen against SARS-CoV-2. The proposed mechanism is that bufalin inhibits Na+/K+-ATPase mediated Src signaling without affecting its ion transport function.	Zhang, Zhe-Rui et al. 2020. “A Cell-Based Large-Scale Screening of Natural Compounds for Inhibitors of SARS-CoV-2.” Signal Transduction and Targeted Therapy 5(1): 218. http://www.nature.com/articles/s41392-020-00343-z (November 16, 2020).	0.016861	0.006888	0.018075	0.00493	2.7591	0.639402	238	0	0.936938	0.026156	0.015728	0.009624	3.09414	0.855977	25	7	0.962452	0.030133
FDB029976	Puerarin	0	0	HKEAFJYKMMKDOR-VPRICQMDSA-N	Isoflavonoids/Isoflavonoid C-glycosides	Potential inhibitor of SARS-CoV-2 main protease (Mpro/3CLpro), in silico studies showing high binding affinity.	Ojo, Oluwafemi Adeleke, Adebola Busola Ojo, Odunayo Anthonia Taiwo, and Olarewaju M Oluba. “Novel Coronavirus (SARS-CoV-2) Main Protease: Molecular Docking of Puerarin as a Potential Inhibitor.” https://doi.org/10.21203/rs.3.rs-37794/v1 (November 16, 2020).	0.017279	0.004521	0.010094	0.001643	3.11178	0.390208	103	0	0.961586	0.002369	0.029577	0.012441	2.41272	0.406463	26	0	0.927211	0.033931
DB07744	Z-Val-Ala-Asp fluoromethyl ketone	-1	0	SUUHZYLYARUNIA-YEWWUXTCSA-N	Peptidomimetics/Hybrid peptides	Competitive and irreversible inhibitor of caspase-1. Relevance to SARS-CoV-2 (from pralnacasan) caspase-1 cleaves and causes maturation of pro-inflammatory cytokines including IL-1β and IL-18. Therefore this compound may counteract hyper-inflammatory state in COVID-19 patients.	National Center for Biotechnology Information. "PubChem Compound Summary for CID 5497171, Benzyloxycarbonyl-Val-Ala-Asp-fluoromethylketone" PubChem, https://pubchem.ncbi.nlm.nih.gov/compound/Benzyloxycarbonyl-Val-Ala-Asp-fluoromethylketone. Accessed 16 November, 2020.	0.017365	0.00244	0.01338	0.000469	3.01077	0.292418	301	0	0.955669	0.002744	0.022535	0.012676	2.71752	0.800634	26	11	0.935714	0.048677
BRD-A19134330	A-23187	0	0	HIYAVKIYRIFSCZ-CVXKHCKVSA-N	Benzoxazoles/NA	N/A	N/A	0.017629	0.003061	0.014085	0.001174	2.95676	0.326562	300	0	0.952159	0.005209	0.022066	0.007981	2.60643	0.557634	25	10	0.938273	0.033434
BRD-K69023402	thapsigargin	0	0	IXFPJGBNCFXKPI-FSIHEZPISA-N	Carboxylic acids and derivatives/Pentacarboxylic acids and derivatives	Thapsigargin is non-competitive inhibitor of the sarco/endoplasmic reticulum Ca2+ ATPase (SERCA) which causes endoplasmic reticulum (ER) stress and activates the unfolded protein response (UPR). Found to inhibit CoV replication, including SARS-CoV-2. Mechanisms suggested include: thapsigargin counteracts CoV-mediated downregulation of inositol-requiring enzyme 1 alpha (IRE1α) and ER chaperone imm…	Shaban, Mohammed Samer et al. 2020. “Inhibiting Coronavirus Replication in Cultured Cells by Chemical ER Stress.” bioRxiv: 2020.08.26.266304. https://www.biorxiv.org/content/10.1101/2020.08.26.266304v1.full (November 16, 2020).	0.018602	0.00219	0.00939	0.000235	3.26425	0.53979	305	0	0.969101	0.008814	0.036854	0.020423	1.84387	0.531086	30	15	0.861929	0.093293
DB07374	Anisomycin	-1	0	YKJYKKNCCRKFSL-RDBSUJKOSA-N	Phenol ethers/Anisoles	Anisomycin inhibits eukaryotic protein synthesis and has wide antiviral activity. Mechanism may relate to genes CUL3, SUMO2 and/or APP as SARS-CoV-2 protein-protein interaction studies identified these genes central to networks that anisomycin is predicted to interact with. Alternatively, anisomycin was among other top candidates identified to bind ribosomal associated proteins Ribosomal Protein …	Cava, Claudia, Gloria Bertoli, and Isabella Castiglioni. 2020. “A Protein Interaction Map Identifies Existing Drugs Targeting SARS-CoV-2.” BMC pharmacology & toxicology 21(1): 65. http://www.ncbi.nlm.nih.gov/pubmed/32883368 (November 16, 2020).	0.019133	0.003606	0.017136	0.000939	2.80593	0.243247	374	0	0.940909	0.002107	0.021362	0.01385	2.671	0.846703	40	25	0.94664	0.042758
BRD-K62910157	C2-dihydroceramide	0	0	CRJGESKKUOMBCT-VQTJNVASSA-N	Sphingolipids/Ceramides	N/A		0.019379	0.001863	0.011033	0.000235	3.16897	0.368535	301	0	0.964591	0.004431	0.034038	0.014789	2.11869	0.53213	25	10	0.896948	0.051431
DB00439	Cerivastatin	-1	0	SEERZIQQUAZTOL-ANMDKAQQSA-N	Pyridines and derivatives/Phenylpyridines	Statin that regulates NLR family pyrin domain containing 3 (NLRP3) inflammasome-mediated inflammation - cerivastatin shown to prevent activation of TNFα‐induced NFκB pathway by inhibition of PI3K/Akt signalling.	Rodrigues‐Diez, Raul R. et al. 2020. “Statins: Could an Old Friend Help in the Fight against COVID‐19?” British Journal of Pharmacology 177(21): 4873–86. https://onlinelibrary.wiley.com/doi/10.1111/bph.15166 (November 16, 2020).	0.019762	0.003001	0.011737	0.000469	3.06909	0.350205	302	0	0.959183	0.004862	0.033273	0.019188	1.84937	0.494192	26	11	0.884191	0.075792
DB12996	Acteoside	-1	0	FBSKJMQYURKNSU-ZLSOWSIRSA-N	Cinnamic acids and derivatives/Hydroxycinnamic acids and derivatives	SARS-CoV-2 main protease (3CLpro/Mpro) inhibitor predicted by molecular docking studies to bind at the hydrophobic pocket (active site) of the protein.	Kallingal, Anoop et al. 2020. “Molecular Modeling Study of Tectoquinone and Acteoside from Tectona Grandis Linn: A New SARS-CoV-2 Main Protease Inhibitor against COVID-19.” Journal of Biomolecular Structure and Dynamics: 1–12. https://www.tandfonline.com/doi/full/10.1080/07391102.2020.1832580 (November 16, 2020).	0.01991	0.003829	0.051174	0.00446	1.97814	0.153898	66	0	0.823956	0.003412	0.007746	0.003286	3.39438	0.704502	25	4	0.981389	0.012363
FDB008116	1,3-Propanedial	0	0	WSMYVTOQOOLQHP-UHFFFAOYSA-N	Organooxygen compounds/Carbonyl compounds	Possibly negative: 1,3-Propanedial (also known as malondialdehyde (MDA)) is a marker of oxidative stress. It is produced by ROS triggered lipid peroxidation of membrane lipids. MDA also reacts with proteins, forming adducts which have been shown to contribute to further inflammation. Overall, this indicates the potential of MDA to contribute to existing inflammation and oxidative stress in COVID-…	Andrade, Felipe, Erika Darrah, and Antony Rosen. 2017. “Autoantibodies in Rheumatoid Arthritis.” Kelley and Firestein’s Textbook of Rheumatology: 831-845.e5. https://www.sciencedirect.com/science/article/pii/B9780323316965000565?via%3Dihub (November 16, 2020).	0.020636	0.003132	0.009859	0.000469	3.21761	0.487838	303	0	0.966967	0.007994	0.043192	0.020892	1.94074	0.444264	25	10	0.873227	0.057206
FDB016629	1,1'-Oxybis[2,4-dibromobenzene]	0	0	XYBSIYMGXVUVGY-UHFFFAOYSA-N	Benzene and substituted derivatives/Diphenylethers	1,1'-Oxybis[2,4-dibromobenzene] (also known as BDE-47) is an endocrine disruptor that increases levels of progesterone in the blood. In this way BDE-47 may have immunomodulatory effects as progesterone has been shown to inhibit production of proinflammatory cytokines IL-1β and IL-12 by macrophages and dendritic cells, favour the Th2 responses over Th1 response, and reduce the production of anti-i…	﻿Mauvais-Jarvis, Franck, Sabra L Klein, and Ellis R Levin. 2020. “Estradiol, Progesterone, Immunomodulation, and COVID-19 Outcomes.” Endocrinology 161(9). http://www.ncbi.nlm.nih.gov/pubmed/32730568 (November 16, 2020) ; ﻿Gregoraszczuk, Ewa L, and Anna Ptak. 2013. “Endocrine-Disrupting Chemicals: Some Actions of POPs on Female Reproduction.” International journal of endocrinology 2013: 828532. ht…	0.020963	0.003591	0.012911	0.000469	3.03558	0.085676	314	0	0.947861	0.009338	0.034038	0.027465	2.34126	0.798981	51	36	0.913431	0.069141
FDB012780	Deoxycholic acid	0	0	KXGVEGMKQFWNSR-UHFFFAOYSA-N	Steroids and steroid derivatives/Bile acids, alcohols and derivatives	Deoxycholic acid (DCA) reported as a ligand for G Protein-Coupled Bile Acid Receptor 1 (GPBAR1). Activation of GPBAR1 has been reported to act in antagonism of the NFκB pathway. As this pathway is activated in COVID-19, DCA holds potential to counteract this activation.	﻿Guo, Cong et al. 2015. “The G-Protein-Coupled Bile Acid Receptor Gpbar1 (TGR5) Inhibits Gastric Inflammation Through Antagonizing NF-ΚB Signaling Pathway.” Frontiers in pharmacology 6: 287. http://www.ncbi.nlm.nih.gov/pubmed/26696888 (November 16, 2020) ; ﻿Carino1, Adriana et al. “Hijacking SARS-Cov-2/ACE2 Receptor Interaction by Natural and Semi-Synthetic Steroidal Agents Acting on Functional P…	0.021601	0.005105	0.017136	0.002582	2.80967	0.50744	279	0	0.941215	0.017915	0.02723	0.010094	2.42595	0.564534	25	10	0.928273	0.040138
FDB012591	Dextran	0	0	FZWBNHMXJMCXLU-BLAUPYHCSA-N	Fatty Acyls/Fatty acyl glycosides	Bacterial product used as anticoagulants, mechanism involving the displacement of heparin.	Hardy, M. et al. 2020. “Management of the Thrombotic Risk Associated with COVID-19: Guidance for the Hemostasis Laboratory.” Thrombosis Journal 18(1): 17. https://thrombosisjournal.biomedcentral.com/articles/10.1186/s12959-020-00230-1 (November 16, 2020).	0.022121	0.004564	0.00939	0.000704	3.26245	0.365737	303	0	0.969022	0.003359	0.052113	0.029577	1.8051	0.37785	25	10	0.844085	0.080071
DB06733	Bafilomycin A1	-1	0	XDHNQDDQEHDUTM-JQWOJBOSSA-N	Macrolides and analogues/NA	Bafilomycin A1 shown to trap ACE2 in perinuclear vacuoles, which may affect overall function of ACE2 and therefore also reduce viral entry.	Yang, Naidi, and Han-Ming Shen. 2020. “Targeting the Endocytic Pathway and Autophagy Process as a Novel Therapeutic Strategy in COVID-19.” International journal of biological sciences 16(10): 1724–31. http://www.ncbi.nlm.nih.gov/pubmed/32226290 (November 16, 2020).	0.023198	0.002624	0.00892	0.000235	3.27021	0.533345	221	0	0.969364	0.008537	0.060329	0.029343	1.67169	0.381495	27	12	0.812034	0.076605
DB04860	Isatoribine	-1	0	TZYVRXZQAWPIAB-FCLHUMLKSA-N	Organooxygen compounds/Carbohydrates and carbohydrate conjugates	Isatoribine is an agonist of toll-like receptor (TLR7). TLR7 is important in recognising viral single-stranded RNA, and therefore agonism of this receptor may induce an effective antiviral response and clearance.	﻿Onofrio, Livia et al. 2020. “Toll-like Receptors and COVID-19: A Two-Faced Story with an Exciting Ending.” Future science OA 6(8): FSO605. http://www.ncbi.nlm.nih.gov/pubmed/32974046 (November 16, 2020) ; ﻿Horsmans, Yves et al. 2005. “Isatoribine, an Agonist of TLR7, Reduces Plasma Virus Concentration in Chronic Hepatitis C Infection.” Hepatology (Baltimore, Md.) 42(3): 724–31. http://www.ncbi.n…	0.02325	0.009316	0.076761	0.014789	1.64341	0.172088	41	0	0.740447	0.021053	0.007042	0.005869	3.50093	1.26431	25	10	0.984969	0.01333
DB03740	N-acetyl-alpha-D-glucosamine	-1	0	OVRNDRQMDRJTHS-PVFLNQBWSA-N	Organooxygen compounds/Carbohydrates and carbohydrate conjugates	This compound is a hexokinase inhibitor. Cell growth with hexokinase inhibitors enhances the type I interferon (IFN) response (IFN-α and IFN-β) which is impaired in COVID-19 patients.	Team, EBI. "N-Acetyl-Alpha-D-Glucosamine (CHEBI:44278)". Ebi.Ac.Uk, 2020, https://www.ebi.ac.uk/chebi/searchId.do?chebiId=44278 ; ﻿Hadjadj, Jérôme et al. 2020. “Impaired Type I Interferon Activity and Inflammatory Responses in Severe COVID-19 Patients.” Science (New York, N.Y.) 369(6504): 718–24. http://www.ncbi.nlm.nih.gov/pubmed/32661059 (November 16, 2020) ; ﻿Ayres, Janelle S. 2020. “A Metabol…	0.024013	0.008293	0.022535	0.005634	2.47883	0.119353	357	0	0.921324	0.003837	0.025587	0.012207	2.36425	0.341769	95	78	0.929419	0.033756
BRD-K41707108	ceramide	0	0	BLTCBVOJNNKFKC-QUDYQQOWSA-N	Sphingolipids/Ceramides	Ceramides and ceramide derivatives have been suggested as drug candidates their activity in influencing host-pathogen interactions and immune regulation. Ceramide is phosphorylated to C1P in the body. C1P is an activator of macrophages, phagocytosis and antigen presentation by dendritic cells. Therefore ceramide may activate the adaptive immune response needed to control SARS-CoV-2 in patients.	Prakash, Hridayesh et al. 2021. “Host Sphingolipids: Perspective Immune Adjuvant for Controlling SARS-CoV-2 Infection for Managing COVID-19 Disease.” Prostaglandins & Other Lipid Mediators 152: 106504. https://www.sciencedirect.com/science/article/pii/S1098882320300976?casa_token=nTkJJBAwmJ0AAAAA:p8UEihQSsyDEEnJc_fN2_XgIIXlWXmh5dCE_SxhPHUotvOHC30YcCGAaqZxuEusGX6oqQQDt3A (November 16, 2020).	0.024293	0.005035	0.019953	0.001174	2.66995	0.382111	174	0	0.928683	0.004241	0.029577	0.021596	2.42766	1.07903	28	13	0.919056	0.068742
DB04468	Afimoxifene	-1	0	TXUZVZSFRXZGTL-QPLCGJKRSA-N	Stilbenes/NA	Possibly negative: Afimoxifene is an estrogen inhibitor/estrogen receptor (ER) inhibitor. This may have negative effects on patient outcome for a number of cytokine/immune regulatory factors, demonstrated by poorer clinical outcome of males.	﻿Calderone, Alba et al. 2020. “Selective Estrogen Receptor Modulators in COVID-19: A Possible Therapeutic Option?” Frontiers in pharmacology 11: 1085. http://www.ncbi.nlm.nih.gov/pubmed/32765279 (November 16, 2020) ; ﻿European Society of Clinical Microbiology and Infectious Diseases. “Higher COVID-19 Mortality in Men Could Be Explained by Differences in Circulating Proteins and Immune System Cell…	0.024978	0.00618	0.011972	0.001643	3.0686	0.525417	301	0	0.959155	0.012004	0.052113	0.023239	1.6876	0.547815	25	10	0.828425	0.070798
BRD-K56301217	ABT-737	0	0	HPLNQCPCUACXLM-PGUFJCEWSA-N	Benzene and substituted derivatives/Biphenyls and derivatives	B-cell lymphoma 2 (Bcl-2) inhibitor ABT-737 --- demonstrated antiviral effects include: inhibited viral replication and induced premature death of infected cells.	Bulanova, Daria et al. 2017. “Antiviral Properties of Chemical Inhibitors of Cellular Anti-Apoptotic Bcl-2 Proteins.” Viruses 9(10): 271. http://www.mdpi.com/1999-4915/9/10/271 (November 16, 2020).	0.025404	0.005343	0.015023	0.001643	2.85159	0.365058	119	0	0.944554	0.005142	0.042958	0.017371	2.10613	0.436838	25	9	0.877888	0.064634
BRD-K70281171	U-99194	0	0	UOLJKAPABHXFRE-UHFFFAOYSA-N	Indanes/NA	N/A	N/A	0.025607	0.011854	0.027934	0.007042	2.36247	0.047996	368	0	0.898697	0.008972	0.023474	0.019953	2.48068	1.30902	25	10	0.93166	0.064797
DB02255	GM6001	-1	0	NITYDPDXAAFEIT-DYVFJYSZSA-N	Carboxylic acids and derivatives/Amino acids, peptides, and analogues	GM6001 (Ilomastat) is an broad spectrum matrix metalloproteinase (MMP) inhibitor with anti-inflammatory effects. Potential for this in COVID-19 has been demonstrated where ilomastat inhibit S-mediated cell-cell fusion and syncytium formation - a method of immune escape by SARS-CoV-2. In addition, recently identified and suggested as a SARS-CoV-2 3CLpro inhibitor.	﻿Resnick, Samuel J et al. 2020. “A Simplified Cell-Based Assay to Identify Coronavirus 3CL Protease Inhibitors.” bioRxiv : the preprint server for biology. http://www.ncbi.nlm.nih.gov/pubmed/32869020 (November 16, 2020) ; ﻿Nguyen, Hanh T. et al. 2020. “Spike Glycoprotein and Host Cell Determinants of SARS-CoV-2 Entry and Cytopathic Effects.” bioRxiv: 2020.10.22.351569. https://www.biorxiv.org/con…	0.025966	0.007504	0.01784	0.003286	2.66142	0.211147	87	0	0.927843	0.007806	0.037793	0.017136	2.02438	0.662608	25	10	0.88267	0.072776
DB12232	KRN-7000	-1	0	VQFKFAKEUMHBLV-BYSUZVQFSA-N	Sphingolipids/Glycosphingolipids	KRN7000 is an immunomodulatory glycosphingolipid, mechanism of binding to major histocompatibility complex-like CD1d protein and subsequent activation of invariant natural killer-T (iNKT) cells.	Sánchez-Fernández, Elena M. et al. 2019. “Synthesis of Polyfluoroalkyl Sp2-Iminosugar Glycolipids and Evaluation of Their Immunomodulatory Properties towards Anti-Tumor, Anti-Leishmanial and Anti-Inflammatory Therapies.” European Journal of Medicinal Chemistry 182: 111604. https://www.sciencedirect.com/science/article/pii/S022352341930738X?casa_token=EOIpEfRh_MsAAAAA:ouYikAZ0ndvdvBTLetNySvMn-l_r8…	0.027055	0.002697	0.038028	0.000704	2.19789	0.058885	93	0	0.866274	0.00328	0.019249	0.010329	2.58789	0.549378	25	10	0.949605	0.02791
DB03575	Phencyclidine	-1	0	JTJMJGYZQZDUJJ-UHFFFAOYSA-N	Organonitrogen compounds/Amines	Phencyclidine, blocks Glutamate Ionotropic Receptor NMDA Type Subunit 2A/B/C/D (GRIN2A/B/C/D). Other agents targeting GRIN2 (Pentobarbital) have been predicted by SARS-CoV-2 interaction mapping so there is potential that expression of this receptor is altered during SARS-CoV-2 infection.	National Center for Biotechnology Information. "PubChem Compound Summary for CID 6468, Phencyclidine" PubChem, https://pubchem.ncbi.nlm.nih.gov/compound/Phencyclidine. Accessed 16 November, 2020 ; ﻿Loganathan, Tamizhini et al. 2020. “Host Transcriptome-Guided Drug Repurposing for COVID-19 Treatment: A Meta-Analysis Based Approach.” PeerJ 8: e9357. https://peerj.com/articles/9357 (November 16, 202…	0.02848	0.005976	0.030047	0.002113	2.36245	0.069305	302	0	0.882743	0.009303	0.026995	0.016901	2.47201	0.834829	25	9	0.918468	0.067403
DB05767	Andrographolide	-1	0	BOJKULTULYSRAS-OTESTREVSA-N	Lactones/Gamma butyrolactones	Andrographolide predicted to inhibit 3CLpro of SARS-CoV-2.	Shi, Tzu-Hau et al. 2020. “Andrographolide and Its Fluorescent Derivative Inhibit the Main Proteases of 2019-NCoV and SARS-CoV through Covalent Linkage.” Biochemical and Biophysical Research Communications 533(3): 467–73. https://www.sciencedirect.com/science/article/pii/S0006291X20316831 (November 16, 2020).	0.028486	0.00622	0.017371	0.001408	2.79046	0.296773	285	0	0.939624	0.000507	0.046714	0.027465	1.84361	0.443552	197	0	0.856566	0.082866
DB11875	3,3'-diindolylmethane	-1	0	VFTRKSBEFQDZKX-UHFFFAOYSA-N	Indoles and derivatives/Indoles	3,3'-diindolylmethane (DIM) shown to increase transcriptional activity of ERα and ERβ transcriptional activities. As increases ER activity can have positive immunomodulatory activities in COVID-19 patients, DIM may provide therapeutic benefit.	﻿Calderone, Alba et al. 2020. “Selective Estrogen Receptor Modulators in COVID-19: A Possible Therapeutic Option?” Frontiers in pharmacology 11: 1085. http://www.ncbi.nlm.nih.gov/pubmed/32765279 (November 16, 2020) ; ﻿Li, Yufei et al. 2019. “3,3′-Diindolylmethane Dose-Dependently Prevents Advanced Prostate Cancer.” bioRxiv: 612929. https://www.biorxiv.org/content/10.1101/612929v1 (November 16, 20…	0.029053	0.00639	0.032394	0.003052	2.2437	0.214189	102	0	0.873931	0.000573	0.026056	0.01338	2.42417	0.474039	25	9	0.929262	0.040799
FDB000763	Glutaral	0	0	SXRSQZLOMIGNAQ-UHFFFAOYSA-N	Organooxygen compounds/Carbonyl compounds	N/A	N/A	0.029079	0.002484	0.023239	0.000469	2.58921	0.217024	300	0	0.920358	0.003048	0.036385	0.013146	2.07935	0.309197	25	10	0.883631	0.035716
FDB020870	1-Methyl-6-phenyl-1H-imidazo[4,5-b]pyridin-2-amine	0	0	UQVKZNNCIHJZLS-UHFFFAOYSA-N	Pyridines and derivatives/Phenylpyridines	Carcinogenic and mutagenic compound.	National Center for Biotechnology Information. "PubChem Compound Summary for CID 1530, 2-Amino-1-methyl-6-phenylimidazo[4,5-b]pyridine" PubChem, https://pubchem.ncbi.nlm.nih.gov/compound/2-Amino-1-methyl-6-phenylimidazo_4_5-b_pyridine. Accessed 16 November, 2020.	0.029937	0.004454	0.025117	0.001174	2.45088	0.300728	167	0	0.904012	0.011407	0.035681	0.016901	2.27328	0.682687	27	0	0.906518	0.052632
DB12025	Triptolide	-1	0	DFBIRQPKNDILPW-CIVMWXNOSA-N	Oxepanes/NA	Triptolide inactivates ras-related C3 botulinum toxin substrate 1 (RAC), thereby blocking human p21-activated kinase (PAK1) and has been found to suppress dengue virus replication during infection by blocking PAK1 signaling pathway. Just one potential benefit to COVID-19 patients lies in the fact that PAK1 is directly upstream of IL-6 production - a key component of patients' cytokine storm.	﻿Matsuyama, Toshifumi et al. 2020. “An Aberrant STAT Pathway Is Central to COVID-19.” Cell Death & Differentiation: 1–17. http://www.nature.com/articles/s41418-020-00633-7 (November 16, 2020) ; ﻿Maruta, Hiroshi, and Hong He. 2020. “PAK1-Blockers: Potential Therapeutics against COVID-19.” Medicine in Drug Discovery 6: 100039. https://www.sciencedirect.com/science/article/pii/S2590098620300269 (Nov…	0.030089	0.009152	0.024883	0.004695	2.50286	0.023065	337	0	0.910479	0.004001	0.036385	0.01784	2.03719	0.466962	38	23	0.892671	0.060269
FDB012642	Patulin	0	0	ZRWPUFFVAOMMNM-UHFFFAOYSA-N	Pyrans/NA	Reported to inhibit T-helper type 1 cells which produce IFN-γ. Although IFN-γ levels are part of the antiviral response, persistent high levels of IFN-γ can increase systemic inflammation seen in severe COVID-19 patients, and levels have been linked to poorer prognosis in COVID-19 patients.	﻿Pal, Saurabh, Neha Singh, and Kausar Mahmood Ansari. 2017. “Toxicological Effects of Patulin Mycotoxin on the Mammalian System: An Overview.” Toxicology research 6(6): 764–71. http://www.ncbi.nlm.nih.gov/pubmed/30090541 (November 16, 2020) ; ﻿Gadotti, Ana Carolina et al. 2020. “IFN-γ Is an Independent Risk Factor Associated with Mortality in Patients with Moderate and Severe COVID-19 Infection.”…	0.030399	0.004868	0.030516	0.001174	2.35848	0.178275	251	0	0.891479	0.003081	0.030282	0.020188	2.37406	0.849034	26	11	0.908483	0.068438
BRD-A94624445	bucladesine	0	0	CJGYSWNGNKCJSB-YVLZZHOMSA-N	Purine nucleotides/Cyclic purine nucleotides	Bucladesine is a cell permeable Cyclic adenosine monophosphate (cAMP) analog. It mimics cAMP and can induce normal physiological responses when added to cells in experimental conditions. Responses can include vasodilation which can counter the pulmonary hypertension of COVID-19 patients.	Team, EBI. "Bucladesine (CHEBI:50095)". Ebi.Ac.Uk, 2020, https://www.ebi.ac.uk/chebi/searchId.do?chebiId=CHEBI:50095.	0.030492	0.003778	0.011033	0.000235	3.16476	0.338461	307	0	0.964377	0.003274	0.084272	0.060798	1.24407	0.417483	25	10	0.70801	0.188341
FDB022678	6-Hydroxydopamine	0	0	DIVDFFZHCJEHGG-UHFFFAOYSA-N	Phenols/Benzenediols	Pro-SARS-CoV-2: SARS-CoV-2 infects cells through interactions with angiotensin converting enzyme 2 (ACE2) and transmembrane serine protease 2 (TMPRSS2). TMPRSS2 was shown to be up-regulated in rats treated with 6-hydroxydopamine	Chaná-Cuevas, Pedro et al. 2020. “The Potential Role of SARS-COV-2 in the Pathogenesis of Parkinson’s Disease.” Frontiers in Neurology 11: 1044. https://www.frontiersin.org/article/10.3389/fneur.2020.01044/full (November 16, 2020).	0.030956	0.007212	0.011033	0.000939	3.17285	0.481975	406	0	0.964786	0.008512	0.086854	0.055399	1.14713	0.45568	25	10	0.717391	0.165159
BRD-K66090100	DMBA	0	0	ARSRBNBHOADGJU-UHFFFAOYSA-N	Polycyclic Aromatic Hydrocarbons/Benz(a)Anthracenes	Carcinogen	Sugiyama, Taketoshi et al. 2002. “7,12-DMBA-Induced Rat Leukemia: A Review with Insights into Future Research.” Leukemia research 26(12): 1053–68. http://www.ncbi.nlm.nih.gov/pubmed/12443876 (November 16, 2020).	0.032228	0.004066	0.014319	0.000469	2.96653	0.318397	300	0	0.952814	0.004641	0.072535	0.035211	1.43196	0.334642	28	0	0.776176	0.102812
BRD-K13571841	pepstatin	0	0	FAXGPCHRFPCXOO-LXTPJMTPSA-N	Oligopeptides/Pepstatins	Anti-SARS-CoV-2: Targets SARS-CoV-2 main protease (Mpro), a critical viral protease	Mittal, Lovika et al. 2020. “Identification of Potential Molecules against COVID-19 Main Protease through Structure-Guided Virtual Screening Approach.” Journal of biomolecular structure & dynamics: 1–19. http://www.ncbi.nlm.nih.gov/pubmed/32396769 (November 16, 2020).	0.033136	0.006888	0.019014	0.001643	2.73026	0.374807	303	0	0.93437	0.012437	0.057746	0.028873	1.73397	0.45903	25	9	0.828206	0.07432
DB04630	Aldosterone	-1	0	PQSUYGKTWSAVDQ-ZVIOFETBSA-N	Hydroxycorticosteroids/11-Hydroxycorticosteroids	Pro-SARS-CoV-2: Upregulation of components of the renin-angiotensin system (RAS) such as aldosterone could promote infection	Cadegiani, Flavio A., Andy Goren, and Carlos G. Wambier. 2020. “Spironolactone May Provide Protection from SARS-CoV-2: Targeting Androgens, Angiotensin Converting Enzyme 2 (ACE2), and Renin-Angiotensin-Aldosterone System (RAAS).” Medical Hypotheses 143: 110112. https://www.sciencedirect.com/science/article/pii/S0306987720321423?casa_token=pi0KdwespYMAAAAA:pSwLito6t8TGpT57X4oLGtn4Skmj_FmF4ib2kXnXl…	0.033513	0.002923	0.020188	0.000235	2.70147	0.229228	300	0	0.931709	0.002414	0.055634	0.036385	1.50236	0.403127	25	10	0.807129	0.102345
DB11651	Dactolisib	1	0	JOGKUKXHTYWRGZ-UHFFFAOYSA-N	Azoles/Imidazoles	Anti-SARS-CoV-2: Dactolisib inhibited SARS-CoV-2 infection-induced cytopathic effect in vitro	Xing, Jing et al. 2020. “Reversal of Infected Host Gene Expression Identifies Repurposed Drug Candidates for COVID-19.” bioRxiv : the preprint server for biology. http://www.ncbi.nlm.nih.gov/pubmed/32511305 (November 16, 2020).	0.033636	0.011967	0.01385	0.005399	2.97154	0.763192	226	0	0.953145	0.024647	0.08169	0.026526	1.53484	0.32361	25	8	0.757559	0.078546
DB12156	Cordycepin	-1	0	OFEZSBMBBKLLBJ-BAJZRUMYSA-N	Deoxyribonucleosides/Deoxyadenosines	Anti-SARS-CoV-2: Binding to non-structural protein 15 (NSP15), a critical coronavirus protein	Kumar, Suresh et al. 2020. “Identification of Phytochemicals as Potential Therapeutic Agents That Binds to Nsp15 Protein Target of Coronavirus (SARS-CoV-2) That Are Capable of Inhibiting Virus Replication.” Phytomedicine: 153317. https://www.sciencedirect.com/science/article/pii/S0944711320301495?casa_token=W6iirUL_BAUAAAAA:7d-IY52M82VGEIJEb84a_tcSPAe8KmiNhGck4VhS4jsuirUcWfZfmz6ycsI5vcAulvbkcWcV9…	0.034472	0.007523	0.053286	0.003052	1.84072	0.090598	304	0	0.813683	0.005747	0.0223	0.018545	2.79384	1.45135	25	9	0.938319	0.058431
FDB011120	Paraquat	0	0	INFDPOAKFNIJBF-UHFFFAOYSA-N	Pyridines and derivatives/Bipyridines and oligopyridines/	Pro-Inflammatory: Paraquat evokes microglial inflammation by up-regulating expression of heat shock protein 60 (HSP60); toll-like receptor 4 (TLR4); myeloid differentiation factor 88 (Myd88) and nuclear factor-kappa B (NF-κB) in vitro	Li, Xin-Lei et al. 2019. “Inhibiting Expression of HSP60 and TLR4 Attenuates Paraquat-Induced Microglial Inflammation.” Chemico-Biological Interactions 299: 179–85. https://www.sciencedirect.com/science/article/pii/S000927971831353X?via%3Dihub (November 16, 2020).	0.034823	0	0.01385	0	2.98275	0.351068	302	0	0.95388	0.006096	0.087559	0.065258	1.06076	0.655924	28	13	0.740444	0.205188
FDB012609	(R)-Sulforaphane	0	0	SUVMJBTUFCVSAD-UHFFFAOYSA-N	Sulfoxides/N/A	Anti-Inflammatory: Sulforaphane alleviates retinal ganglion cell death and inflammation by suppressing nod-like receptor protein 3 (NLRP3) inflammasome activation	Gong, Yuerong, Xiaoning Cao, Lei Gong, and Weiguo Li. 2019. “Sulforaphane Alleviates Retinal Ganglion Cell Death and Inflammation by Suppressing NLRP3 Inflammasome Activation in a Rat Model of Retinal Ischemia/Reperfusion Injury.” International journal of immunopathology and pharmacology 33: 2058738419861777. http://www.ncbi.nlm.nih.gov/pubmed/31266422 (November 16, 2020).	0.035171	0.004969	0.028638	0.000939	2.40157	0.127932	300	0	0.897493	0.003828	0.043192	0.026291	2.09961	0.76644	31	16	0.880007	0.076838
BRD-K45988865	tetramethylsilane	0	0	JDBCWSHYEQUBLW-UHFFFAOYSA-N	Organosilicon Compounds/Trimethylsilyl Compounds	Reference compound for NMR, commonly used as a control in experiments	N/A	0.036828	0.01054	0.035446	0.006573	2.25228	0.331777	26	0	0.875322	0.024924	0.038263	0.016901	2.34375	0.470283	15	1	0.899623	0.056108
FDB022385	Angiotensin IV	0	0	QSBGWDDCOJYQGY-KOQODJNWSA-N	Carboxylic acids and derivatives/Amino acids, peptides, and analogues	Anti-COVID: Angiotensin IV targets the angiotensin 4 receptor (AT4R). This peptide was found to exhibit cardioprotective, anti-hypertensive, anti-hypertrophic and/or anti-inflammatory potentials. Such naturally-produced molecules of the RAS are expected to counteract the SARS-CoV-2-induced over-activation of RAS and reverse, to some extent, the associated COVID-19 disease profile	Annweiler, Cédric et al. 2020. “Counter-Regulatory ‘Renin-Angiotensin’ System-Based Candidate Drugs to Treat COVID-19 Diseases in SARS-CoV-2-Infected Patients.” Infectious Disorders - Drug Targets 20(4): 407–8. https://www.eurekaselect.com/182054/article (November 16, 2020).	0.037559	0.008657	0.037559	0.004695	2.14828	0.110554	108	0	0.857544	0.013661	0.037559	0.015962	2.06632	0.629642	25	10	0.882982	0.065267
BRD-K28907958	CD-437	0	0	LDGIHZJOIQSHPB-UHFFFAOYSA-N	Carotenoids/Retinoids	Pro-Apoptotic	Gonda, Kazue et al. 2008. “Synthetic Retinoid CD437 Induces Mitochondria-Mediated Apoptosis in Hepatocellular Carcinoma Cells.” Biochemical and biophysical research communications 370(4): 629–33. http://www.ncbi.nlm.nih.gov/pubmed/18406343 (November 16, 2020).	0.038176	0.005301	0.071362	0.003521	1.68355	0.025169	256	0	0.758574	0.01132	0.020423	0.007981	2.82124	0.531325	25	8	0.952083	0.023136
BRD-A53416814	ceramide	0	0	BLTCBVOJNNKFKC-UHFFFAOYSA-N	N/A	Pro-Inflammatory: The acid sphingomyelinase/ceramide system regulates the internalization of bacteria into the host cell, the subsequent cytokine release, inflammatory response, and initiation of host cell apoptosis. In addition, ceramide has been implicated in the fusion of phagosomes and lysosomes upon bacterial infection. Thus, this system modulates the reorganization of cell membrane receptor…	Li, Cao et al. 2019. “Acid Sphingomyelinase-Ceramide System in Bacterial Infections.” Cell Physiol Biochem 52: 280–301. www.cellphysiolbiochem.com (November 16, 2020).	0.038186	0.005653	0.030751	0.001174	2.32327	0.279807	142	0	0.886338	0.010269	0.047418	0.02723	1.92706	0.803407	28	13	0.857745	0.097038
BRD-K65814004	diphenyleneiodonium	0	0	QFXKXRXFBRLLPQ-UHFFFAOYSA-N	Organic Chemicals/Onium Compounds	Anti-Inflammatory: Diphenyleneiodonium inhibits NF-κB activation and inducible nitric oxide synthase (iNOS) expression induced by interleukin 1 beta (IL-1β)	Mendes, A. Ferreira, A. Pato Carvalho, M. Margarida Caramona, and M. Celeste Lopes. 2001. “Diphenyleneiodonium Inhibits NF-ΚB Activation and INOS Expression Induced by IL-1β: Involvement of Reactive Oxygen Species.” Mediators of Inflammation 10(4): 209–15. http://www.hindawi.com/journals/mi/2001/379585/abs/ (November 16, 2020).	0.038486	0.005233	0.052582	0.001643	1.95592	0.203548	101	0	0.819137	0.010733	0.028169	0.016667	2.48823	0.729121	25	10	0.914611	0.061778
DB11430	Monensin sodium	0	0	GAOZTHIDHYLHMS-KEOBGNEYSA-N	Heterocyclic Compounds, 1-Ring/Furans	N/A	N/A	0.038891	0.009918	0.034272	0.003991	2.21817	0.062152	302	0	0.877069	0.00271	0.044131	0.024648	1.93763	0.753284	25	10	0.861481	0.088214
DB01954	Rolipram	-1	0	HJORMJIFDVBMOB-UHFFFAOYSA-N	Pyrrolidines/Pyrrolidinones	Anti-COVID: Rolipram inhibits phosphodiesterase 4B (PDE 4B), an enzyme that plays an essential role in the early stages of COVID-19 pneumonia	Mansour, Mostafa A., Asmaa M. AboulMagd, and Hamdy M. Abdel-Rahman. 2020. “Quinazoline-Schiff Base Conjugates: In Silico Study and ADMET Predictions as Multi-Target Inhibitors of Coronavirus (SARS-CoV-2) Proteins.” RSC Advances 10(56): 34033–45. http://xlink.rsc.org/?DOI=D0RA06424F (November 16, 2020).	0.040124	0.003219	0.082629	0.000939	1.5729	0.00941	163	0	0.722703	0.01077	0.019484	0.011033	2.83628	0.865424	25	10	0.951278	0.037658
BRD-K35723520	darinaparsin	0	0	JGDXFQORBMPJGR-YUMQZZPRSA-N	Organic Chemicals/Arsenicals	Anti-SARS-CoV-2: Binds to several coronavirus proteins, including RNA dependant RNA polymerase (RdRp) and NSP15 endonuclease	Chowdhury, Trinath, Gourisankar Roymahapatra, and Santi M Mandal. 2020. “In Silico Identification of a Potent Arsenic Based Approved Drug Darinaparsin against SARS-CoV-2: Inhibitor of RNA Dependent RNA Polymerase (RdRp) and Necessary Proteases.” https://chemrxiv.org/articles/preprint/In_Silico_Identification_of_a_Potent_Arsenic_Based_Approved_Drug_Darinaparsin_against_SARS-CoV-2_Inhibitor_of_RNA_…	0.04061	0.01514	0.04061	0.007512	2.05336	0.105703	81	0	0.839517	0.011615	0.04061	0.030516	1.91255	0.591149	15	9	0.882205	0.087841
DB13919	Candesartan	-1	0	HTQMVQVXFRQIKW-UHFFFAOYSA-N	Azoles/Tetrazoles	Anti-COVID: Candesartan downregulates genes involved in the COVID-19 cytokine storm	Elkahloun, Abdel G., and Juan M. Saavedra. 2020. “Candesartan Could Ameliorate the COVID-19 Cytokine Storm.” Biomedicine & Pharmacotherapy 131: 110653. https://www.sciencedirect.com/science/article/pii/S0753332220308465 (November 16, 2020).	0.041204	0.011605	0.037089	0.006103	2.22244	0.00486	281	0	0.871234	0.022029	0.045775	0.022066	1.7612	0.432723	25	10	0.85069	0.07461
DB13145	Nedaplatin	-1	0	GYAVMUDJCHAASE-UHFFFAOYSA-M	Organometallic Compounds/Organoplatinum Compounds	Platinum Based Chemotherapeutic	N/A	0.041406	0.00619	0.033099	0.001643	2.3294	0.050643	320	0	0.873677	0.013571	0.051797	0.02332	1.67628	0.411707	25	10	0.83728	0.064453
DB07348	Brefeldin A	-1	0	KQNZDYYTLMIZCT-KQPMLPITSA-N	Lactones/Macrolides	Anti-CoV: Inhibition of DNA and RNA viruses reported. Furthermore, cytoplasmic replication compartments of coronavirus is reduced by Brefeldin A	Grose, Charles, and Daniel J Klionsky. 2016. “Alternative Autophagy, Brefeldin A and Viral Trafficking Pathways.” Autophagy 12(9): 1429–30. http://www.ncbi.nlm.nih.gov/pubmed/27439673 (November 16, 2020).	0.041414	0.006622	0.019484	0.001408	2.72301	0.103866	303	0	0.925288	0.008421	0.088028	0.031136	1.30779	0.292802	25	10	0.725256	0.084582
DB00958	Carboplatin	-1	0	VSRXQHXAPYXROS-UHFFFAOYSA-N	Organic Chemicals/Coordination Complexes	Platinum Based Chemotherapeutic	N/A	0.041584	0.00618	0.033333	0.001643	2.3294	0.050643	320	0	0.873677	0.013571	0.051878	0.023239	1.67628	0.411707	25	10	0.83728	0.064453
FDB023124	Thromboxane	0	0	RZWIIPASKMUIAC-VQTJNVASSA-N	Fatty Acyls/Eicosanoids	Pro-SARS-CoV-1: Pro-coagulant effects induced by thromboxane have been reported to be highly expressed in SARS-CoV-1 infected mononuclear cells. In addition, thromboxane synthase (TBXAS) and Toll-like receptor 9 (TLR9) have also been identified as targets of the SARS-CoV-1	Giannis, Dimitrios, Ioannis A. Ziogas, and Panagiota Gianni. 2020. “Coagulation Disorders in Coronavirus Infected Patients: COVID-19, SARS-CoV-1, MERS-CoV and Lessons from the Past.” Journal of Clinical Virology 127: 104362. https://www.sciencedirect.com/science/article/pii/S1386653220301049 (November 16, 2020).	0.041718	0.007686	0.022535	0.001878	2.61161	0.098346	301	0	0.917935	0.004818	0.07723	0.031455	1.35461	0.307174	25	10	0.766975	0.082091
DB06732	beta-Naphthoflavone	-1	0	OUGIDAPQYNCXRA-UHFFFAOYSA-N	Flavonoids/Benzoflavones	Anti-Inflammatory: Beta-naphthoflavone inhibits lipopolysaccharide (LPS)-induced inflammation in BV-2 cells via AKT/ nuclear factor erythroid 2–related factor 2 (Nrf-2) /haem oxygenase-1 (HO-1)-NF-κB signalling axis	Gao, Xiyu et al. 2020. “Beta-Naphthoflavone Inhibits LPS-Induced Inflammation in BV-2 Cells via AKT/Nrf-2/HO-1-NF-ΚB Signaling Axis.” Immunobiology 225(4): 151965. http://www.ncbi.nlm.nih.gov/pubmed/32747020 (November 16, 2020).	0.043806	0.012953	0.04108	0.008216	2.02843	0.137658	332	0	0.860732	0.012414	0.046714	0.020423	1.80391	0.597521	26	11	0.851218	0.077126
DB04473	Alpha-L-Fucose	-1	0	SHZGCJCMOBCMKK-SXUWKVJYSA-N	Fucopyranose/L-Fucopyranose	Pro-Inflammatory: Upregulation of pro-inflammatory cytokines, e.g. Fucose induced significantly higher secretion of tumour necrosis factor-alpha (TNF-α) by both lymphocytes and monocytes	Stanková, J. 1992. “Fucose-Activated Killer Cells. I. Enhanced TNF-Alpha MRNA Accumulation and Protein Production.” Journal of leukocyte biology 52(2): 188–96. http://www.ncbi.nlm.nih.gov/pubmed/1506775 (November 16, 2020).	0.044219	0.014266	0.055164	0.013146	1.77781	0.123987	437	0	0.806975	0.047709	0.035446	0.015482	2.24985	0.393807	110	88	0.905407	0.046358
DB02261	Platelet Activating Factor	-1	0	HVAUUPRFYPCOCA-AREMUKBSSA-N	glycerophosphocholine/alkyl,acyl-sn-glycero-3-phosphocholine	Pro-COVID: The receptors ACE2, platelet activating factor (PAF) and toll-like receptor (TLR) are involved in inflammation as well as in virus binding to stabilize and enter into the cell. Consequently there is a correlations of COVID-19 disease manifestations and biological characteristics with those caused by PAF, which shows the involvement of PAF in COVID-19 disease.	Demopoulos, Constantinos A. 2020. “Is Platelet-Activating Factor (PAF) a Missing Link for Elucidating the Mechanism of Action of the Coronavirus SARS-CoV-2 and Explaining the Side Effects-Complications of COVID-19 Disease?” https://www.preprints.org/manuscript/202006.0253/v1 (November 16, 2020).	0.04679	0.009343	0.064319	0.005634	1.76379	0.038114	61	0	0.773177	0.027791	0.034038	0.015493	2.14347	0.452664	21	6	0.9088	0.044537
BRD-K24610782	n-nitrosodiethylamine	0	0	WBNQDOYYEUMPFS-UHFFFAOYSA-N	Nitroso Compounds/Nitrosamines	Carcinogen	Donovan, Paul J, and George T Smith. 2008. “Urethane and N-Nitrosodiethylamine Are Mutagenic for the Syrian Hamster Fetus.” Mutation research 657(2): 160–63. http://www.ncbi.nlm.nih.gov/pubmed/18755288 (November 16, 2020).	0.047069	0.009272	0.043897	0.005634	2.01462	0.108952	303	0	0.85302	0.00478	0.050469	0.015258	1.80004	0.377025	25	10	0.848334	0.052685
DB09298	Silibinin A	-1	0	SEBFKMXJBCUCAI-HKTJVKLFSA-N	Flavonolignans/Silymarin	Anti-COVID/Anti-SARS-CoV-2: Targeting of both cytokine storm and viral replication through signal transducer and activator of transcription 3 (STAT3) and RNA dependant RNA polymerase (RdRp)	Bosch-Barrera, Joaquim et al. 2020. “Silibinin and SARS-CoV-2: Dual Targeting of Host Cytokine Storm and Virus Replication Machinery for Clinical Management of COVID-19 Patients.” Journal of Clinical Medicine 9(6): 1770. https://www.mdpi.com/2077-0383/9/6/1770 (November 16, 2020).	0.04772	0.007197	0.034038	0.002347	2.28209	0.275416	163	0	0.880055	0.016214	0.066901	0.022066	1.64834	0.404719	25	10	0.799322	0.068885
BRD-K12244279	MEK1-2-inhibitor	0	0	JLOXTZFYJNCPIS-FYWRMAATSA-N	Nitriles/Acetonitriles	Anti-CoV: Inhibition of mitogen-activated protein kinase (MEK) signalling axis significantly impacted coronavirus progeny production	Ghasemnejad-Berenji, Morteza, and Sarvin Pashapour. 2020. “Comment SARS-CoV-2 and the Possible Role of Raf/MEK/ERK Pathway in Viral Survival: Is This a Potential Therapeutic Strategy for COVID-19? Keywords COVID-19 · Raf/MEK/ERK Signaling · RNA Viruses · Viral Life Cycle · Viral Survival.” www.karger.com/pha (November 16, 2020).	0.048808	0.009937	0.026291	0.006573	2.45122	0.44497	138	0	0.904055	0.033622	0.09061	0.015023	1.39989	0.199409	25	10	0.720648	0.043326
FDB019390	Garlicin	0	0	PFRGXCVKLLPLIP-UHFFFAOYSA-N	Allyl sulphur compounds /N/A	Anti-Microbial: Derived from garlic, garlicin has been scientifically observed to have its anti-oxidant, anti-inflammatory, and anti-stress properties, anti-cancer, cardiovascular disease, anti-diabetic property, immunity booster and antimicrobial effects	Kandwal, Shubhangi, and Darren Fayne. 2020. “Repurposing Drugs for Treatment of SARS-CoV-2 Infection: Computational Design Insights into Mechanisms of Action.” Journal of Biomolecular Structure and Dynamics: 1–15. https://www.tandfonline.com/doi/full/10.1080/07391102.2020.1825232 (November 16, 2020).	0.049597	0.007089	0.036385	0.001408	2.26675	0.115317	307	0	0.873968	0.003672	0.067606	0.035681	1.38169	0.360648	25	9	0.798447	0.110787
FDB020531	(-)-Gossypol	0	0	QBKSWRVVCFFDOT-UHFFFAOYSA-N	Prenol lipids/Sesquiterpenoids	Anti-SARS-CoV-2: Gossypol was found to be active in vitro against SARS-CoV-2 with an inhibition of 66.34%.	Kandwal, Shubhangi, and Darren Fayne. 2020. “Repurposing Drugs for Treatment of SARS-CoV-2 Infection: Computational Design Insights into Mechanisms of Action.” Journal of Biomolecular Structure and Dynamics: 1–15. https://www.tandfonline.com/doi/full/10.1080/07391102.2020.1825232 (November 16, 2020).	0.04994	0.00244	0.034272	0.000235	2.28308	0.052843	290	0	0.870603	0.009606	0.07277	0.025352	1.5409	0.428465	37	22	0.774652	0.075987
DB06641|KRX-0401	Perifosine	-1	0	SZFPYBIJACMNJV-UHFFFAOYSA-N	Trimethyl Ammonium Compounds/Choline	Anti-Inflammatory: Perifosine inhibits lipopolysaccharide (LPS)-induced tumour necrosis factor alpha (TNF-α) production via regulation multiple signalling pathways	Shen, Jie, Li Liang, and Chunlin Wang. 2013. “Perifosine Inhibits Lipopolysaccharide (LPS)-Induced Tumor Necrosis Factor (TNF)-α Production via Regulation Multiple Signaling Pathways: New Implication for Kawasaki Disease (KD) Treatment.” Biochemical and Biophysical Research Communications 437(2): 250–55. https://www.sciencedirect.com/science/article/pii/S0006291X13010425?casa_token=SKZyJcKj4tYAAA…	0.049955	0	0.052113	0	1.96585	0.191062	69	0	0.821304	0.006819	0.047887	0.023474	1.99832	0.465819	25	10	0.863431	0.069008
DB05383	Pimagedine	-1	0	HAMNKKUPIHEESI-UHFFFAOYSA-N	Amidines/Guanidines	N/A	N/A	0.051579	0.007682	0.039906	0.001643	2.17878	0.1933	185	0	0.862967	0.00956	0.066667	0.035915	1.61644	0.358018	25	10	0.794148	0.087289
FDB028946	2-Deoxygalactopyranose	0	0	PMMURAAUARKVCB-DUVQVXGLSA-N	Organooxygen compounds/Carbohydrates and carbohydrate conjugates	N/A	N/A	0.051868	0.009272	0.048357	0.002817	2.04905	0.125381	220	0	0.838656	0.002356	0.055634	0.030516	1.87346	0.527953	25	10	0.837669	0.103796
DB02731	Ethylmercurithiosalicylic acid	-1	0	HXQVQGWHFRNKMS-UHFFFAOYSA-M	organomercury compound/alkylmercury compound	Anti-Inflammatory: Inhibition of vascular endothelial growth factor VEGF release	Asadi, S et al. 2010. “Luteolin and Thiosalicylate Inhibit HgCl(2) and Thimerosal-Induced VEGF Release from Human Mast Cells.” International journal of immunopathology and pharmacology 23(4): 1015–20. http://journals.sagepub.com/doi/10.1177/039463201002300406 (November 16, 2020).	0.052108	0.00969	0.09108	0.005634	1.51683	0.02256	183	0	0.700323	0.00256	0.029812	0.016667	2.39775	0.733094	29	6	0.925172	0.045599
BRD-K97808269	BRD-K97808269	0	0	PMMURAAUARKVCB-ZXXMMSQZSA-N	monosaccharide/hexose	N/A	N/A	0.052119	0.008398	0.048826	0.002347	2.02875	0.112769	224	0	0.834553	0.000638	0.055634	0.030047	1.87907	0.527977	25	10	0.837553	0.103961
FDB028314	4-(Methylnitrosamino)-1-(3-pyridyl)-1-butanone	0	0	FLAQQSHRLBFIEZ-UHFFFAOYSA-N	Organooxygen compounds/Carbonyl compounds	Anti-SARS-CoV-2: 4-(methylnitrosamino)-1-(3-pyridyl)-1-butanone (NNK) induced downregulation of ACE2 in 16HBE cells	Wang, Gui-Zhen et al. 2020. “Degradation of SARS-CoV-2 Receptor ACE2 by Tobacco Carcinogen-Induced Skp2 in Lung Epithelial Cells.” bioRxiv: 2020.10.13.337774. https://www.biorxiv.org/content/10.1101/2020.10.13.337774v1.full (November 16, 2020).	0.05272	0	0.04554	0	2.09572	0.072831	259	0	0.839984	0.007795	0.061033	0.025352	1.68382	0.431007	25	10	0.815767	0.073867
DB11720	Angiotensin 1-7	1	0	PVHLMTREZMEJCG-GDTLVBQBSA-N	Angiotensins/Angiotensin I	Pro-COVID: Angiotensin 1-7 can to the activation of the sympathetic nervous system. This activation causes systemic vasoconstriction and increases pulmonary capillary leaking, causing acute respiratory distress syndrome (ARDS).	Cure, Erkan, and Medine Cumhur Cure. 2020. “Angiotensin-Converting Enzyme Inhibitors and Angiotensin Receptor Blockers May Be Harmful in Patients with Diabetes during COVID-19 Pandemic.” Diabetes & Metabolic Syndrome: Clinical Research & Reviews 14(4): 349–50. https://www.sciencedirect.com/science/article/pii/S1871402120300850?casa_token=lwofhYVI_tIAAAAA:TnxIdt2OrX0tMt0EMg64A_r0JCFDImPX3HvWlqEkty…	0.05346	0.006971	0.05939	0.002113	1.79806	0.070132	113	0	0.79601	0.014068	0.048122	0.023005	2.03983	0.590999	25	10	0.854987	0.08396
BRD-K41431477	A-23187	0	0	HIYAVKIYRIFSCZ-CYEMHPAKSA-N	Heterocyclic Compounds, 2-Ring/Benzoxazoles	Pro-Inflammatory: A-23187 elicited rapid increase in the biosynthesis of prostaglandins and leukotrienes in a time-dependent manner	Rao, T S, J L Currie, A F Shaffer, and P C Isakson. 1993. “Evaluation of 5-Lipoxygenase Inhibitors, Zileuton, A-78773 and ICI-D-2138 in an Ionophore (A-23187)-Induced Pleural Inflammation Model in the Rat.” Life sciences 53(9): PL147-52. http://www.ncbi.nlm.nih.gov/pubmed/8394967 (November 16, 2020).	0.054108	0.014392	0.053991	0.00493	1.92604	0.180636	162	0	0.812498	0.014602	0.054225	0.042019	1.93125	0.934426	28	13	0.838101	0.128551
BRD-A58280226	Y-27632	0	0	IYOZTVGMEWJPKR-UHFFFAOYSA-N	Organic Chemicals/Amides	Anti-Inflammatory: Y-27632 acutely reverses the increased airway responsiveness to histamine and prostaglandin F2 alpha (PGF2α) through inhibition of Rho kinase	Rao, T S, J L Currie, A F Shaffer, and P C Isakson. 1993. “Evaluation of 5-Lipoxygenase Inhibitors, Zileuton, A-78773 and ICI-D-2138 in an Ionophore (A-23187)-Induced Pleural Inflammation Model in the Rat.” Life sciences 53(9): PL147-52. http://www.ncbi.nlm.nih.gov/pubmed/8394967 (November 16, 2020).	0.056994	0.011231	0.035211	0.00493	2.26244	0.254318	394	0	0.876953	0.015122	0.092254	0.025587	1.39523	0.327716	25	7	0.720828	0.075461
DB12645	Givinostat	-1	0	YALNUENQHAQXEA-UHFFFAOYSA-N	Acids, Acyclic/Carbamates	Anti-SARS-CoV-2: An extent of binding with Mpro	A Mohamed, Mamdouh F, Gamal A El-Din Abuo-Rahma, Alaa M Hayallah, and Ayman Nafady. 2020. “Molecular Docking Study Reveals The Potential Repurposing of Histone Deacetylase Inhibitors Against COVID-19.” Article in International Journal of Pharmaceutical Sciences and Research. http://dx.doi.org/10.13040/IJPSR.0975-8232.11 (November 16, 2020).	0.057052	0.010091	0.042019	0.001878	2.17414	0.089896	302	0	0.856019	0.006134	0.077465	0.054225	1.3939	0.516501	25	10	0.781907	0.155063
FDB021824	Equol	0	0	ADFCQWZHKCXPAJ-GFCCVEGCSA-N	Isoflavonoids/Isoflavans	Anti-Inflammatory: Inhibits LPS-induced TNF-α production and TNF-α mRNA expression in mouse macrophages.	Lin, I-Chian et al. 2016. “Equol Suppresses Inflammatory Response and Bone Erosion Due to Rheumatoid Arthritis in Mice.” The Journal of Nutritional Biochemistry 32: 101–6. https://www.sciencedirect.com/science/article/pii/S0955286316300195?via%3Dihub (November 16, 2020).	0.057576	0.008836	0.060094	0.003052	1.83075	0.019613	190	0	0.790075	0.010558	0.055164	0.025587	1.7249	0.472878	25	3	0.834967	0.074678
FDB013252	4-Oxononanal	0	0	MGOKSQNXXRPCMD-UHFFFAOYSA-N	Organooxygen compounds/Carbonyl compounds	N/A	N/A	0.058779	0.010286	0.044601	0.003521	2.05266	0.063463	286	0	0.851633	0.011684	0.077465	0.030047	1.29916	0.38548	26	11	0.754956	0.100125
DB02056	Prostaglandin D2	-1	0	BHMBVRSPMRCCGG-OUTUXVNYSA-N	Prostaglandins/Prostaglandins D	Pro-COVID: Prostaglandin D2 (PGD2) is a key meditator of lymphopenia in COVID-19	Gupta, Ajay, and Kate Chander Chiang. 2020. “Prostaglandin D2 as a Mediator of Lymphopenia and a Therapeutic Target in COVID-19 Disease.” Medical Hypotheses 143: 110122. https://www.sciencedirect.com/science/article/pii/S0306987720318570?casa_token=nnogzq0lnYEAAAAA:ILMSsTYGkNEFPHMr7ds3n5hZVcNt9HA4CC9aL_zaEQtpb2vDbXM7O81B3n0yABP8kuBkNsN6mA (November 16, 2020).	0.060226	0.010883	0.06385	0.005869	1.76657	0.014296	304	0	0.773897	0.020771	0.056808	0.020181	1.76673	0.338508	26	10	0.833241	0.06176
DB06987	2-(4-(2-HYDROXY-3-(ISOPROPYLAMINO)PROPOXY)PHENYL)ETHANAMIDE	-1	0	METKIMKYRPQLGS-GFCCVEGCSA-N	Propanolamines/Phenoxypropanolamines	N/A	N/A	0.060978	0.017629	0.063615	0.011033	1.76883	0.280549	225	0	0.774483	0.0435	0.058451	0.028169	1.84148	0.652371	25	7	0.824877	0.106796
BRD-K95785537	PP-2	0	0	PBBRWFOVCUAONR-UHFFFAOYSA-N	Heterocyclic Compounds, 1-Ring/Pyrimidines	N/A	N/A	0.062609	0.031385	0.074883	0.025587	1.65706	0.371517	200	0	0.744308	0.082589	0.052347	0.038498	1.95278	0.945704	25	9	0.843036	0.126033
DB01933	7-Hydroxystaurosporine	-1	0	PBCZSGKMGDDXIJ-HQCWYSJUSA-N	Alkaloids/Indole Alkaloids	N/A	N/A	0.062818	0.006964	0.051408	0.002582	1.97722	0.152923	179	0	0.823759	0.00938	0.076761	0.018779	1.56783	0.268938	25	10	0.767508	0.045447
BRD-K17110974	aristolochic-acid	0	0	BBFQZRXNYIEMAW-UHFFFAOYSA-N	Phenanthrenes/Aristolochic Acids	Anti-Inflammatory: We suggest that one mechanism of the anti-inflammatory activity of alkaloid may be directly blocking phospholipase A2 (PLA2) catalysed release of arachidonic acid.	Moreno, J.J. 1993. “Effect of Aristolochic Acid on Arachidonic Acid Cascade and in Vivo Models of Inflammation.” Immunopharmacology 26(1): 1–9. https://www.sciencedirect.com/science/article/pii/016231099390061T?via%3Dihub (November 16, 2020).	0.06461	0.006246	0.055399	0.000939	1.90056	0.043784	277	0	0.806689	0.003032	0.075352	0.041549	1.48599	0.459041	197	80	0.770129	0.117323
FDB023065	Cortisone	0	0	MFYSYFVPBJMHGN-ZPOLXVRWSA-N	Steroids and steroid derivatives /Hydroxysteroids	Anti-SARS-CoV-2: Inhaled corticosteroids downregulate the ACE2 in chronic obstructive pulmonary disease (COPD) through suppression of type I interferon	Finney, Lydia J. et al. 2020. “Inhaled Corticosteroids Downregulate the SARS-CoV-2 Receptor ACE2 in COPD through Suppression of Type I Interferon.” Journal of Allergy and Clinical Immunology. https://www.sciencedirect.com/science/article/pii/S009167492031407X (November 16, 2020).	0.065197	0.014688	0.044601	0.006338	2.07448	0.044962	302	0	0.852254	0.006286	0.095305	0.034038	1.27174	0.264527	25	10	0.706955	0.090924
FDB002085	Quinine hydrochloride	0	0	LBSFSRMTJJPTCW-DSXUQNDKSA-N	Cinchona alkaloids/N/A	Anti-SARS-CoV-2: Blockade of ACE-2 receptor by quinine prevents binding and entry of virus into cells	Lestari, K., Sitorus, T., Instiaty, Megantara, S., & Levita, J. (2020). Molecular docking of quinine, chloroquine and hydroxychloroquine to angiotensin converting enzyme 2 (ACE2) receptor for discovering new potential COVID-19 antidote. Journal of Advanced Pharmacy Education and Research, 10(2), 1-4.	0.069229	0.015857	0.083333	0.009155	1.58038	0.056458	300	0	0.722131	0.025634	0.057512	0.027465	1.69983	0.42032	198	0	0.827445	0.080728
FDB029685	bornan-2-one (Camphor)	0	0	DSSYKIVIOFKYAU-UHFFFAOYSA-N	Prenol lipids/Monoterpenoids	Pro-Inflammatory: Triggering of liver and lung inflammation via activation of NF-kB and up-regulation of pro-inflammatory mediators.	Somade, Oluwatobi T. et al. 2019. “Camphor Elicits Up-Regulation of Hepatic and Pulmonary pro-Inflammatory Cytokines and Chemokines via Activation of NF-KB in Rats.” Pathophysiology 26(3–4): 305–13. https://www.sciencedirect.com/science/article/pii/S0928468019300689?casa_token=-Gt4fGRjuC8AAAAA:1ufcEZRgV8Q26bEvt3qjCN1Ptu1_kIIJaIvmE8yBMjb-KU-Fh0kjNM3QlEXMNy5a3dR4S0Vhow (November 16, 2020).	0.069477	0.013607	0.081925	0.006573	1.59315	0.039533	304	0	0.725905	0.022278	0.05892	0.028169	1.67512	0.421952	200	0	0.823257	0.081748
DB11841	Entinostat	-1	0	INVTYAOGFAGBOE-UHFFFAOYSA-N	Benzoates/Benzamides	Anti-SARS-CoV-2: Viral non-structural protein 5 (NSP5) interacts with the histone deacetylases	Pavel, Alisa et al. “Network Analysis of Host Response to SARS-CoV-2 Reveals a New Set of Genes with Therapeutic and Long Term Implications for COVID-19 Disease Computational Intelligence in Neuroimaging View Project MOL2NET Conference Series View Project.” https://www.researchgate.net/publication/343230508 (November 16, 2020).	0.070988	0.010232	0.069249	0.00446	1.72559	0.129035	191	0	0.763117	0.013977	0.07277	0.023474	1.68717	0.348432	28	9	0.791885	0.066413
BRD-K61463582	BRD-K61463582	0	0	PPQNQXQZIWHJRB-UHFFFAOYSA-N	Polycyclic Aromatic Hydrocarbons/Benz(a)Anthracenes	N/A	N/A	0.071547	0.014562	0.05493	0.006103	1.8032	0.102568	306	0	0.807886	0.014088	0.093192	0.034742	1.27719	0.27267	25	10	0.717817	0.084496
DB03880	Batimastat	-1	0	XFILPEOLDIKJHX-QYZOEREBSA-N	Sulphur Compounds/Thiophenes	Anti-Viral: It has been demonstrated in the murine coronavirus mouse hepatitis virus uses an unidentified batimastat‐sensitive metalloprotease for both viral entry and virus‐mediated cell–cell fusion	Doboszewska, Urszula, Piotr Wlaź, Gabriel Nowak, and Katarzyna Młyniec. 2020. “Targeting Zinc Metalloenzymes in Coronavirus Disease 2019.” British Journal of Pharmacology 177(21): 4887–98. https://onlinelibrary.wiley.com/doi/10.1111/bph.15199 (November 16, 2020).	0.072001	0.0111	0.090141	0.003052	1.53423	0.035841	96	0	0.709593	0.001362	0.057512	0.040376	1.80582	0.819555	27	12	0.828479	0.134935
FDB021797	3-Hydroxybutanoic acid	0	0	WHBMMWSBFZVSSR-UHFFFAOYSA-N	Hydroxy acids and derivatives/Beta hydroxy acids and derivatives	N/A	N/A	0.072239	0.012072	0.090376	0.005399	1.52841	0.057784	301	0	0.706447	0.021086	0.057741	0.02699	1.69999	0.405739	201	0	0.827222	0.073885
BRD-K07691486	roscovitine	0	0	BTIHMVBBUGXLCJ-OAHLLOKOSA-N	Heterocyclic Compounds, 2-Ring/Purines	Anti-Viral: Roscovitine is a purine derivative cyclin dependant kinase (CDKI) that inhibits CDK1, CDK2, CDK5, CDK7 and CDK9. It has been reported that roscovitine blocked the replication of a variety of viruses in vitro, such as herpes simplex virus (HSV) and human immunodeficiency virus (HIV). Potential implication in COVID-19 therapy	Huang, Qi et al. 2020. “Kinase Inhibitor Roscovitine as a PB2 Cap-Binding Inhibitor against Influenza a Virus Replication.” Biochemical and Biophysical Research Communications 526(4): 1143–49. https://www.sciencedirect.com/science/article/pii/S0006291X20307567 (November 16, 2020).	0.072368	0.003928	0.061972	0.000469	1.80295	0.092589	236	0	0.783174	0.003023	0.084507	0.032864	1.47317	0.34874	26	2	0.748936	0.079476
FDB010088	Polyacrylamide	0	0	HRPVXLWXLXDGHG-UHFFFAOYSA-N	Carboximidic acids and derivatives	N/A	N/A	0.07386	0.01251	0.092958	0.00939	1.4692	0.110825	300	0	0.696936	0.025091	0.058685	0.016667	1.77061	0.273115	25	10	0.817543	0.04733
BRD-K59184148	SB-216763	0	0	JCSGFHVFHSKIJH-UHFFFAOYSA-N	Maleates/Maleimides	N/A	N/A	0.075364	0.027775	0.057746	0.016432	1.87142	0.406431	198	0	0.799879	0.058346	0.098357	0.046948	1.29564	0.457221	25	10	0.699026	0.126223
FDB008459	Rhodamine B	0	0	CVAVMIODJQHEEH-UHFFFAOYSA-O	Carboximidic acids	N/A	N/A	0.07542	0.018835	0.092488	0.013615	1.47398	0.151104	307	0	0.713105	0.022098	0.061502	0.026056	1.71538	0.524866	28	13	0.815542	0.070545
DB00533	Rofecoxib	-1	0	RZJQGNCSTQAWON-UHFFFAOYSA-N	Organic Chemicals/Lactones	Anti-Inflammatory: Inhibitor of cyclooxygenase 2 (COX-2), a key mediator of inflammation	Akula, Kiran Kumar, Ashish Dhir, and S.K. Kulkarni. 2008. “Rofecoxib, a Selective Cyclooxygenase-2 (COX-2) Inhibitor Increases Pentylenetetrazol Seizure Threshold in Mice: Possible Involvement of Adenosinergic Mechanism.” Epilepsy Research 78(1): 60–70. https://www.sciencedirect.com/science/article/pii/S092012110700321X (November 16, 2020).	0.076563	0.024497	0.06338	0.015493	1.77946	0.02923	327	0	0.777216	0.046178	0.092488	0.038732	1.20006	0.34944	25	6	0.732069	0.104092
DB04297	7-[4-(Dimethylamino)Phenyl]-N-Hydroxy-4,6-Dimethyl-7-Oxo-2,4-Heptadienamide (Trichostatin A)	-1	0	RTKIYFITIVXBLE-QEQCGCAPSA-N	Hydroxylamines/Hydroxamic Acids	Anti-Viral: TSA minimizes the number of viral genomes in Herpes Simplex Virus-1 infected cells. Notably, respiratory syncytial virus (RSV) reduced histone acetylation by enhancing HDAC2 expression; a research study using the HDACIs Trichostatin A showed that this drug inhibits RSV replication and decreased RSV-induced airway inflammation and oxida­tive stress.	Dey, Samrat K., Md. Mahbubur Rahman, Umme R. Siddiqi, and Arpita Howlader. 2020. “Analyzing the Epidemiological Outbreak of COVID‐19: A Visual Exploratory Data Analysis Approach.” Journal of Medical Virology 92(6): 632–38. https://onlinelibrary.wiley.com/doi/abs/10.1002/jmv.25743 (November 16, 2020).	0.077187	0.020345	0.059859	0.005634	1.91435	0.019821	301	0	0.794542	0.015308	0.099531	0.073474	1.03245	1.15083	27	12	0.71524	0.21646
DB02557	Phosphoramidon	-1	0	ZPHBZEQOLSRPAK-XLCYBJAPSA-N	Glycoconjugates/Glycopeptides	N/A	N/A	0.081435	0.013204	0.068075	0.006573	1.73325	0.174967	328	0	0.765158	0.023804	0.097418	0.026526	1.29688	0.249858	26	11	0.694264	0.060424
BRD-K63993117	BRD-K63993117	0	0	CZIHNRWJTSTCEX-UHFFFAOYSA-N	Acetates/Acetamides	N/A	N/A	0.081558	0.009724	0.080047	0.002817	1.57524	0.039679	302	0	0.732265	0.022774	0.083099	0.033568	1.4247	0.440176	25	10	0.75358	0.090624
DB07662	N-[4-(3-BROMO-PHENYLAMINO)-QUINAZOLIN-6-YL]-ACRYLAMIDE	-1	0	HTUBKQUPEREOGA-UHFFFAOYSA-N	Heterocyclic Compounds, 2-Ring/Quinazolines	N/A	N/A	0.091197	0.036847	0.090845	0.030282	1.51844	0.344451	144	0	0.70338	0.089137	0.091549	0.044836	1.47627	0.471893	30	15	0.73123	0.119517
DB02998	Methyltrienolone	-1	0	CCCIJQPRIXGQOE-XWSJACJDSA-N	Estranes/Estrenes	N/A	N/A	0.093107	0.01823	0.097183	0.008685	1.4361	0.113178	412	0	0.706618	0.00619	0.089202	0.038263	1.29563	0.28287	25	9	0.713552	0.099524
FDB018468	4-Nonylphenol	0	0	IGFHQQFPSIBGKE-UHFFFAOYSA-N	Phenols/ 1-hydroxy-2-unsubstituted benzenoids	Pro-Inflammatory: Splenic dendritic cells from 4-Nonylphenol‐exposed mice secrete increased levels of interleukin 6 (IL‐6) and TNF‐α	Suen, J. L. et al. 2013. “A Common Environmental Pollutant, 4-Nonylphenol, Promotes Allergic Lung Inflammation in a Murine Model of Asthma.” Allergy 68(6): 780–87. http://doi.wiley.com/10.1111/all.12156 (November 16, 2020).	0.094949	0.011228	0.094131	0.003052	1.49116	0.017948	173	0	0.694892	0.00528	0.095775	0.041315	1.34487	0.425267	25	9	0.720195	0.103651

## Sheet: anti SARS-CoV-2-food compounds
STRICT SELECTION
ID	Name	Approved	InChIKey	Present in...	Class (Class/Subclass)	Mechanism	Reference	GeoMean(r_vals(neg)_median)	GeoMean(r_vals(neg)_MAD)	wiki_r_vals(neg)_median	wiki_r_vals(neg)_MAD	wiki_Normalized_correlation_median	wiki_Normalized_correlation_MAD	wiki_Gene_connection_counts_median	wiki_Gene_connection_counts_MAD	wiki_Probability_estimate_median	wiki_Probability_estimate_MAD	aggr_r_vals(neg)_median	aggr_r_vals(neg)_MAD	aggr_Normalized_correlation_median	aggr_Normalized_correlation_MAD	aggr_Gene_connection_counts_median	aggr_Gene_connection_counts_MAD	aggr_Probability_estimate_median	aggr_Probability_estimate_MAD
FDB017702	Epigallocatechin 3-gallate	0	WMBWREPUVVBILR-WIYYLYMNSA-N	Almond|Apple|Apricot|Avocado|Banana|Blackcurrant|Brazil nut|Broad bean|Broccoli|Brussel sprouts|Carrot|Cashew nut|Cauliflower|Chickpea|Coffee|Common bean|Common cabbage|Common grape|Common hazelnut|Common pea|Common walnut|Common wheat|Corn|Cucumber|Cucurbita (Gourd)|Custard apple|Eggplant|European plum|Fig|Garden rhubarb|Garden tomato (var.)|German camomile|Gooseberry|Green bean|Green bell peppe…	Prenol lipids/Terpene glycosides	Anti-SARS-CoV-2: From in silico docking studies; Polyphenols (epigallocatechin gallate, epicatechingallate and gallocatechin-3-gallate) interact strongly with one or both catalytic residues (His41 and Cys145) of Mpro.	Ghosh, Rajesh, Ayon Chakraborty, Ashis Biswas, and Snehasis Chowdhuri. 2020. “Evaluation of Green Tea Polyphenols as Novel Corona Virus (SARS CoV-2) Main Protease (Mpro) Inhibitors – an in Silico Docking and Molecular Dynamics Simulation Study.” Journal of Biomolecular Structure and Dynamics: 1–13. https://www.tandfonline.com/doi/full/10.1080/07391102.2020.1779818 (November 16, 2020).	0.001757	0.000469	0.001878	0.000235	4.14656	0.744561	382	0	0.991428	0.003128	0.001643	0.000939	4.56659	0.970139	25	10	0.996663	0.002752
FDB031212	trans-resveratrol	1	LUKBXSAWLPMMSZ-OWOJBTEDSA-N	Abiyuch|Acorn|Adzuki bean|Alfalfa|Allium (Onion)|Allspice|Almond|Amaranth|American cranberry|American pokeweed|Angelica|Anise|Apple|Apricot|Arrowroot|Asparagus|Avocado|Bamboo shoots|Banana|Barley|Bilberry|Bitter gourd|Black chokeberry|Black elderberry|Black salsify|Black walnut|Black-eyed pea|Blackcurrant|Borage|Brazil nut|Breadfruit|Broad bean|Broccoli|Brussel sprouts|Burdock|Butternut|Cabbage|C…	Stilbenes	Anti-SARS-CoV-2: Binding of Resveratrol derivatives to the novel COVID-19 receptors [Papain-like Protease of SARS CoV-2 (PBD ID: 6W9C) and 2019- nCoV RNA-dependent RNA Polymerase (PBD ID: 6M71)]	Ranjbar, A., M. Jamshidi, and S. Torabi. 2020. “Molecular Modelling of the Antiviral Action of Resveratrol Derivatives against the Activity of Two Novel SARS CoV-2 and 2019-NCoV Receptors.” European review for medical and pharmacological sciences 24(14): 7834–44.	0.002239	0	0.000235	0	5.16437	1.32082	330	0	0.998085	0.001231	0.021362	0.020892	2.07463	0.799397	27	10	0.94794	0.051188
FDB005891	Parthenolide	0	KTEXNACQROZXEV-SLXBATTESA-N	Sweet bay	Phenol lipids/Terpene Lactones	Anti-COVID (Attenuation of Cytokine Storm): Parthenolide is the principal sesquiterpene lactones and the main biologically active constituent Tanacetum parthenium (commonly known as feverfew) which has could significantly reduce interleukin 1 (IL‐1), IL‐2, IL‐6, IL‐8, and tumour necrosis factor (TNF‐α) production pathways established in several human cell line models in vitro and in vivo studies.…	Bahrami, Mohsen et al. 2020. “Cytokine Storm in COVID ‐19 and Parthenolide: Preclinical Evidence.” Phytotherapy Research 34(10): 2429–30. https://onlinelibrary.wiley.com/doi/10.1002/ptr.6776 (November 16, 2020).	0.004264	0.001863	0.007746	0.001643	3.26023	0.438832	106	0	0.968923	0.00332	0.002347	0.002113	4.34549	1.494	25	10	0.993719	0.006103
FDB011904	Quercetin	0	REFJWTPEDVJJIY-UHFFFAOYSA-N	Almond|American cranberry|Angelica|Anise|Apple|Apricot|Arrowroot|Asparagus|Avocado|Banana|Bilberry|Black chokeberry|Black elderberry|Black walnut|Blackcurrant|Borage|Brazil nut|Breadfruit|Broad bean|Broccoli|Brussel sprouts|Cabbage|Capers|Caraway|Carob|Carrot|Cashew nut|Cauliflower|Ceylon cinnamon|Cherry tomato|Chicory|Chives|Cloudberry|Cloves|Cocoa bean|Coffee|Common bean|Common buckwheat|Common…	Flavonoids/Flavones	Anti-SARS-CoV-2: Quercetin has been identified as a SARS-CoV-2 3C-like protease (3CLpro) inhibitor by an activity-based experimental screening.	Abian, Olga et al. 2020. “Structural Stability of SARS-CoV-2 3CLpro and Identification of Quercetin as an Inhibitor by Experimental Screening.” International Journal of Biological Macromolecules 164: 1693–1703. https://www.sciencedirect.com/science/article/pii/S0141813020339970?casa_token=IpLIj51dcBcAAAAA:eY6n_gNpc9Sgl7G5wjpo5OuUHCEVJy_uNZ2PHM8zB0Vy_PBGRevbqw1inXDvYVWn0xnd9zoFNdo (November 16, 20…	0.007089	0.001833	0.002817	0.000235	4.05149	0.888273	300	0	0.990147	0.004743	0.01784	0.014319	2.63943	0.832804	25	10	0.958508	0.0339
FDB021653	Luteolin 7-rhamnosylglucoside	0	IQPNAANSBPBGFQ-UHFFFAOYSA-N	Dandelion|German camomile|Lemon|Sweet orange	Flavonoids/Flavones	N/A	N/A	0.008625	0.001197	0.011737	0.000469	3.0765	0.343619	300	0	0.95961	0.004472	0.006338	0.003052	3.41312	0.756985	46	31	0.983919	0.011162
FDB011828	Genistein	0	TZBJGXHYKVUXJN-UHFFFAOYSA-N	Abiyuch|Acorn|Adzuki bean|Alfalfa|Allium (Onion)|Allspice|Almond|Amaranth|American cranberry|American pokeweed|Angelica|Anise|Apple|Apricot|Arrowroot|Asparagus|Avocado|Bamboo shoots|Banana|Barley|Bilberry|Bitter gourd|Black chokeberry|Black elderberry|Black salsify|Black walnut|Black-eyed pea|Blackcurrant|Borage|Brazil nut|Breadfruit|Broad bean|Broccoli|Brussel sprouts|Burdock|Butternut|Cabbage|C…	Isoflavonoids/Isoflav-2-enes	Anti-SARS-CoV-2: The results show high to a moderate binding affinity for the phytoestrogens (Genistein) and some physiological hormones such as estrogens, progesterone, testosterone, and cholesterol to the Heat Shock Protein Family A (HSPA5) substrate binding domain beta (SBDβ)	Elfiky, Abdo A. 2020. “Natural Products May Interfere with SARS-CoV-2 Attachment to the Host Cell.” Journal of Biomolecular Structure and Dynamics: 1–10. https://www.tandfonline.com/doi/full/10.1080/07391102.2020.1761881 (November 16, 2020).	0.008833	0.001936	0.005634	0.000469	3.54347	0.527988	390	0	0.979339	0.004975	0.01385	0.007981	2.90077	0.575907	25	10	0.963804	0.020593
FDB030727	cinnamaldehyde	0	KJPRLNWUNMBNBZ-QPJJXVBHSA-N	Abiyuch|Acorn|Adzuki bean|Alfalfa|Allium (Onion)|Allspice|Almond|Amaranth|American cranberry|American pokeweed|Angelica|Anise|Apple|Apricot|Arrowroot|Asparagus|Avocado|Bamboo shoots|Banana|Barley|Bilberry|Bitter gourd|Black chokeberry|Black elderberry|Black salsify|Black walnut|Black-eyed pea|Blackcurrant|Borage|Brazil nut|Breadfruit|Broad bean|Broccoli|Brussel sprouts|Burdock|Butternut|Cabbage|C…	Cinnamaldehydes/NA	Anti-SARS-CoV-2: The results show high to a moderate binding affinity for cinnamaldehyde to the HSPA5 SBDβ Anti-Inflammatory/Anti-bacterial: Cinnamaldehyde is a natural essential oil suggested to possess anti-bacterial and anti-inflammatory properties; and to activate transient receptor potential ankyrin 1 (TRPA1) channels expressed on neuronal and non-neuronal cells.	﻿Mendes, Saulo J F et al. 2016. “Cinnamaldehyde Modulates LPS-Induced Systemic Inflammatory Response Syndrome through TRPA1-Dependent and Independent Mechanisms.” International immunopharmacology 34: 60–70. http://www.ncbi.nlm.nih.gov/pubmed/26922677 (November 16, 2020) ; ﻿“Natural Products May Interfere with SARS-CoV-2 Attachment to the Host Cell.” 2020. https://www.researchsquare.com/article/rs…	0.013456	0.002405	0.014554	0.000704	3.00388	0.311908	264	0	0.955236	0.003827	0.012441	0.008216	2.8537	1.0959	25	5	0.965569	0.02775
FDB003675	Prostaglandin F-2-alpha	0	PXGPLTODNUVGFL-RTYMFESYSA-N	Soft-necked garlic|Tarragon	Fatty Acyls/Eicosanoids	Link to Inflammation: PGF2α release by omental mature adipocytes is increased in abdominally obese women. Moreover, cyclo-oxygenase 2 (COX-2) expression and prostaglandin factor 2 alpha (PGF2α) release is particularly responsive to inflammatory stimulation in omental preadipocytes.	Michaud, Andréanne et al. 2014. “Prostaglandin (PG) F2 Alpha Synthesis in Human Subcutaneous and Omental Adipose Tissue: Modulation by Inflammatory Cytokines and Role of the Human Aldose Reductase AKR1B1” ed. Kang Sun. PLoS ONE 9(3): e90861. https://dx.plos.org/10.1371/journal.pone.0090861 (November 16, 2020).	0.014817	0.003418	0.005634	0.000469	3.51079	0.472967	303	0	0.978338	0.004109	0.038967	0.024883	2.06775	0.516319	25	10	0.887824	0.065359
FDB005562	Erythroneopterin	0	BMQYVXCPAOLZOK-XINAWCOVSA-N	Soy bean	Pteridines and derivatives/Pterins and derivatives	Pro-Inflammatory: During T-helper 1 (Th1)-type immune response, e.g., triggered by a viral infection, 6-d-erythro-neopterin (molecular weight 253.2 Da) is generated and released in increased amounts by human macrophages upon activation by interferon-γ.	Zheng, Bojian et al. 2005. “Serum Neopterin for Early Assessment of Severity of Severe Acute Respiratory Syndrome.” Clinical Immunology 116(1): 18–26. https://www.sciencedirect.com/science/article/pii/S1521661605000811?casa_token=U37Xhe2LxdIAAAAA:7f_wMMlG5fci_nrUuLYLcGCkCRgm3tEIUZHeccy8C3Okd9Ctnj_E7JAmiKSqfBKz4FS-W_6OF7U (November 16, 2020).	0.017345	0.002727	0.016432	0.000704	2.81625	0.385026	160	0	0.941752	0.009133	0.01831	0.010563	2.65449	0.538364	26	11	0.956166	0.027982
FDB031247	urate	0	LEHOTFFKMJEONL-UHFFFAOYSA-N	Abiyuch|Acorn|Adzuki bean|Alfalfa|Allium (Onion)|Allspice|Almond|Amaranth|American cranberry|American pokeweed|Angelica|Anise|Apple|Apricot|Arrowroot|Asparagus|Avocado|Bamboo shoots|Banana|Barley|Bilberry|Bitter gourd|Black chokeberry|Black elderberry|Black salsify|Black walnut|Black-eyed pea|Blackcurrant|Borage|Brazil nut|Breadfruit|Broad bean|Broccoli|Brussel sprouts|Burdock|Butternut|Cabbage|C…	Imidazopyrimidines/Purines and purine derivatives	Pro-Inflammatory: Several regulatory mechanisms involved in the inflammatory reaction induced by monosodium urate crystals (MSU) during acute gout have been identified.	Fernandes, Maria J, and Paul H Naccache. 2018. “The Role of Inhibitory Receptors in Monosodium Urate Crystal-Induced Inflammation.” Frontiers in immunology 9: 1883. http://www.ncbi.nlm.nih.gov/pubmed/30177932 (November 16, 2020).	0.019939	0.003096	0.026056	0.001408	2.46181	0.030447	300	0	0.893665	0.011739	0.015258	0.006808	2.922	0.727482	25	10	0.960241	0.026619
FDB002798	Apigenin	0	KZNIFHPLKGYRTM-UHFFFAOYSA-N	Abiyuch|Acorn|Adzuki bean|Alfalfa|Allium (Onion)|Allspice|Almond|Amaranth|American cranberry|American pokeweed|Angelica|Anise|Apple|Apricot|Arrowroot|Asparagus|Avocado|Bamboo shoots|Banana|Barley|Bilberry|Bitter gourd|Black chokeberry|Black elderberry|Black salsify|Black walnut|Black-eyed pea|Blackcurrant|Borage|Brazil nut|Breadfruit|Broad bean|Broccoli|Brussel sprouts|Burdock|Butternut|Cabbage|C…	Flavonoids/Flavones	Anti-SARS-CoV-2: More potent activity appeared to be associated with the presence of an apigenin moiety at position C-3′ of flavones, as biflavone had an effect on 3CLpro inhibitory activity. Pro-Inflammatory: Apigenin restricted melanoma growth through multiple mechanisms, among which its suppression of programmed cell death protein ligand 1 (PD-L1) expression exerted a dual effect via regulatin…	﻿Xu, Lu et al. 2018. “Apigenin Suppresses PD-L1 Expression in Melanoma and Host Dendritic Cells to Elicit Synergistic Therapeutic Effects.” Journal of experimental & clinical cancer research : CR 37(1): 261. http://www.ncbi.nlm.nih.gov/pubmed/30373602 (November 16, 2020) ; ﻿Ryu, Young Bae et al. 2010. “Biflavonoids from Torreya Nucifera Displaying SARS-CoV 3CLpro Inhibition.” Bioorganic & Medicin…	0.021207	0.002603	0.024883	0.000704	2.50353	0.256921	206	0	0.910559	0.008516	0.018075	0.009624	2.66085	0.778065	41	26	0.954526	0.033197
FDB021814	Creatinine	0	DDRJAANPRJIHGJ-UHFFFAOYSA-N	Abiyuch|Acorn|Adzuki bean|Alfalfa|Allium (Onion)|Allspice|Almond|Amaranth|American cranberry|American pokeweed|Angelica|Anise|Apple|Apricot|Arrowroot|Asparagus|Avocado|Bamboo shoots|Banana|Barley|Bilberry|Bitter gourd|Black chokeberry|Black elderberry|Black salsify|Black walnut|Black-eyed pea|Blackcurrant|Borage|Brazil nut|Breadfruit|Broad bean|Broccoli|Brussel sprouts|Burdock|Butternut|Cabbage|C…	Carboxylic acids and derivatives/Amino acids, peptides, and analogues	Diagnostic Biomarker, can be removed from list. No therapuetic implications identified	N/A	0.023198	0.002846	0.00892	0.000235	3.28394	0.314261	302	0	0.969962	0.00135	0.060329	0.034507	1.71081	0.483684	25	9	0.823665	0.098846
FDB028311	3-Methyladenine	0	FSASIHFSFGAIJM-UHFFFAOYSA-N	Abiyuch|Acorn|Adzuki bean|Alfalfa|Allium (Onion)|Allspice|Almond|Amaranth|American cranberry|American pokeweed|Angelica|Anise|Apple|Apricot|Arrowroot|Asparagus|Avocado|Bamboo shoots|Banana|Barley|Bilberry|Bitter gourd|Black chokeberry|Black elderberry|Black salsify|Black walnut|Black-eyed pea|Blackcurrant|Borage|Brazil nut|Breadfruit|Broad bean|Broccoli|Brussel sprouts|Burdock|Butternut|Cabbage|C…	Imidazopyrimidines/Purines and purine derivatives	Antiviral: 3-Methyladenine (3-MA) inhibits autophagy by blocking autophagosome formation by inhibition of phosphoinositide 3-kinase (PI3K) . Modulation of autophagy usually affects the replication of coronaviruses (including SARS-CoV-2) whether inhibition or induction, this may reflect the disruption of the precise control that viruses have over autophagy .	﻿Bello-Perez, Melissa et al. 2020. “Canonical and Noncanonical Autophagy as Potential Targets for COVID-19.” Cells 9(7): 1619. https://www.mdpi.com/2073-4409/9/7/1619 (November 16, 2020) ; ﻿Heckmann, Bradlee L, Xingyuan Yang, Xiaodong Zhang, and Jun Liu. 2013. “The Autophagic Inhibitor 3-Methyladenine Potently Stimulates PKA-Dependent Lipolysis in Adipocytes.” British Journal of Pharmacology 168(…	0.023708	0.002807	0.007981	0.000235	3.31588	0.412777	314	0	0.971308	0.004382	0.070423	0.033568	1.51114	0.348563	25	10	0.802354	0.089234
FDB003516	Chromium	0	VYZAMTAEIAYCRO-UHFFFAOYSA-N	Adzuki bean|Alfalfa|Allium (Onion)|Allspice|Almond|American cranberry|Apple|Apricot|Asparagus|Avocado|Bamboo shoots|Banana|Barley|Bilberry|Black salsify|Black walnut|Black-eyed pea|Blackcurrant|Brazil nut|Broccoli|Brussel sprouts|Burdock|Butternut|Cabbage|Caraway|Cardamom|Carrot|Cashew nut|Cassava|Cauliflower|Ceylon cinnamon|Chanterelle|Chayote|Cherimoya|Chervil|Chickpea|Chicory|Chinese cabbage|C…	Homogeneous transition metal compounds/NA	Anti-Inflammatory: Cell line studies have shown evidence of the anti-inflammatory benefit of chromium	Moradi, Fardin et al. 2019. “Potential Roles of Chromium on Inflammatory Biomarkers in Diabetes: A Systematic Review.” Clinical and Experimental Pharmacology and Physiology 46(11): 975–83. https://onlinelibrary.wiley.com/doi/abs/10.1111/1440-1681.13144 (November 16, 2020).	0.024198	0.004528	0.015493	0.000704	2.87932	0.336371	304	0	0.946663	0.006958	0.037793	0.029108	2.06326	0.633499	25	10	0.895494	0.076534
FDB002536	Quercetin 3-rutinoside	0	IKGXIBQEEMLURG-NVPNHPEKSA-N	Almond|Amaranth|Anise|Apple|Apricot|Asparagus|Bilberry|Black elderberry|Blackcurrant|Broccoli|Brussel sprouts|Capers|Carrot|Cherry tomato|Chicory|Cocoa bean|Common bean|Common buckwheat|Common grape|Common oregano|Common sage|Common thyme|Coriander|Cottonseed|Cucumber|Cucurbita (Gourd)|Date|Dill|Eggplant|Endive|European plum|Fennel|Fenugreek|Fig|French plantain|Garden onion|Garden rhubarb|Garden …	Flavonoids/Flavonoid glycosides	Anti-Microbial: This class of natural products is becoming the subject of anti-infective research, and many groups have isolated and identified the structures of flavonoids possessing antifungal, antiviral and antibacterial activity.	Cushnie, T P Tim, and Andrew J Lamb. 2005. “Antimicrobial Activity of Flavonoids.” International journal of antimicrobial agents 26(5): 343–56. http://www.ncbi.nlm.nih.gov/pubmed/16323269 (November 16, 2020).	0.024351	0.005455	0.049531	0.003521	1.94145	0.07409	300	0	0.831837	0.001713	0.011972	0.008451	3.29707	0.962397	26	5	0.9758	0.020014
FDB030243	1-chloro-2,4-dinitrobenzene	0	VYZAHLCBVHPDDF-UHFFFAOYSA-N	Abiyuch|Acorn|Adzuki bean|Alfalfa|Allium (Onion)|Allspice|Almond|Amaranth|American cranberry|American pokeweed|Angelica|Anise|Apple|Apricot|Arrowroot|Asparagus|Avocado|Bamboo shoots|Banana|Barley|Bilberry|Bitter gourd|Black chokeberry|Black elderberry|Black salsify|Black walnut|Black-eyed pea|Blackcurrant|Borage|Brazil nut|Breadfruit|Broad bean|Broccoli|Brussel sprouts|Burdock|Butternut|Cabbage|C…	Benzene and substituted derivatives/Nitrobenzenes	Pro-Inflammatory (and therefore potentially pro-COVID): 1-chloro-2,4-dinitrobenzene has been shown to stimulate tumour necrosis factor alpha (TNF-α) expression, probable negative influence on COVID-19 patients, as anti-TNF therapies e.g. Etanercept (anti-TNF-α) therapies have shown success.	﻿Brito, Carlos Antunes et al. 2020. “COVID-19 in Patients with Rheumatological Diseases Treated with Anti-TNF.” Annals of the rheumatic diseases. http://www.ncbi.nlm.nih.gov/pubmed/32546603 (November 16, 2020) ; ﻿Duret, Pierre-Marie et al. 2020. “Recovery from COVID-19 in a Patient with Spondyloarthritis Treated with TNF-Alpha Inhibitor Etanercept.” Annals of the rheumatic diseases 79(9): 1251–52…	0.025634	0.005317	0.012441	0.000704	3.10817	0.240066	337	0	0.960692	0.000695	0.052817	0.040141	1.84511	0.560999	26	11	0.851497	0.103324
FDB000488	Ochratoxin A	0	RWQKHEORZBHNRI-BMIGLBTASA-N	Barley|Common wheat	Ochratoxins and related substances/NA	Anti-Inflammatory: Ochratoxin A (OA) has been reported to affect immune function both at the level of antibody synthesis and natural killer (NK) cell activity. Exposure of purified human lymphocyte populations and subpopulations to the toxin will abrogate the cells' ability to respond to activating stimuli in vitro. Thus, both IL-2 production and IL-2 receptor expression of activated T lymphocyte…	Lea, Tor, Karen Steien, and Fredrik C. Stormer. 1989. “Mechanism of Ochratoxin A-Induced Immunosuppression.” Mycopathologia 107(2–3): 153–59. http://link.springer.com/10.1007/BF00707553 (November 16, 2020).	0.026541	0.005363	0.022066	0.001408	2.70011	0.133524	456	0	0.925895	0.005687	0.031925	0.020423	2.27464	0.780363	35	0	0.913247	0.064104
FDB030054	Gadolinium	0	UIWYJDYFSGRHKR-UHFFFAOYSA-N	Dill|Red beetroot|Romaine lettuce|Spinach	Homogeneous lanthanide compounds/NA	N/A	N/A	0.027727	0.008739	0.015023	0.002582	2.88666	0.155659	306	0	0.944857	0.002352	0.051174	0.029577	1.72714	0.477912	29	14	0.838523	0.09014
FDB000436	Sanguinarine	0	INVGWHRKADIJHF-UHFFFAOYSA-N	Opium poppy	N/A	Anti-Inflammatory/Oxidant: In vitro and in vivo studies have revealed that Sanguinarine has antioxidant, anti-inflammatory, proapoptotic, and growth inhibitory effects on tumor cells of a variety of cancers	Fu, Chenxing, Guiping Guan, and Hongbing Wang. 2018. “The Anticancer Effect of Sanguinarine: A Review.” Current pharmaceutical design 24(24): 2760–64. http://www.ncbi.nlm.nih.gov/pubmed/30156147 (November 16, 2020).	0.028865	0.009448	0.056338	0.008451	1.80969	0.081963	321	0	0.804625	0.019026	0.014789	0.010563	3.10276	1.01881	27	7	0.966002	0.029714
FDB000939	1H-Indole-3-methanol	0	IVYPNXXAYMYVSP-UHFFFAOYSA-N	Broccoli|Brussel sprouts|Cabbage|White cabbage	Indoles and derivatives/Indoles	N/A	N/A	0.029036	0.005475	0.052817	0.003991	1.95474	0.170616	163	0	0.818879	0.01339	0.015962	0.007512	3.10167	0.58296	25	8	0.964208	0.019942
FDB015535	Chrysin	0	RTIXKCRFFJGDFG-UHFFFAOYSA-N	Carrot|Sour cherry|Sweet orange|Wild carrot	Flavonoids/Flavones	Anti-Viral: The antiviral activity of propolis is associated with the presence of phenolic compounds (e.g., galangin, chrysin, p‐coumaric acid, kaempferol, and quercetin), which block or reduce the adsorption and entrance of the virus into the host cells	Lima, William G., Júlio C. M. Brito, and Waleska S. Cruz Nizer. 2020. “Bee Products as a Source of Promising Therapeutic and Chemoprophylaxis Strategies against COVID ‐19 ( SARS‐CoV ‐2).” Phytotherapy Research: ptr.6872. https://onlinelibrary.wiley.com/doi/10.1002/ptr.6872 (November 16, 2020).	0.029676	0.008057	0.030751	0.00446	2.25415	0.213686	89	0	0.875625	0.000134	0.028638	0.014554	2.34023	0.590267	32	0	0.914708	0.051512
FDB031031	n-butanoate	0	FERIUCNNQQJTOY-UHFFFAOYSA-N	Abiyuch|Acorn|Adzuki bean|Alfalfa|Allium (Onion)|Allspice|Almond|Amaranth|American cranberry|American pokeweed|Angelica|Anise|Apple|Apricot|Arrowroot|Asparagus|Avocado|Bamboo shoots|Banana|Barley|Bilberry|Bitter gourd|Black chokeberry|Black elderberry|Black salsify|Black walnut|Black-eyed pea|Blackcurrant|Borage|Brazil nut|Breadfruit|Broad bean|Broccoli|Brussel sprouts|Burdock|Butternut|Cabbage|C…	Fatty Acyls/Fatty acids and conjugates	Anti-SARS-CoV-2: This compound has been shown to regulate gene expression by inhibition of histone deacetylases (HDACs) (1-2). In SARS-CoV-2 infection HDACs have been implicated in viral interactions between the 3CLpro (non-structural protein 5 (Nsp5)) and HDAC2, where it has been suggested that this inhibits its entry into the nucleus, reducing the interferon (IFN) response . Therefore butyric a…	﻿Berni Canani, Roberto, Margherita Di Costanzo, and Ludovica Leone. 2012. “The Epigenetic Effects of Butyrate: Potential Therapeutic Implications for Clinical Practice.” Clinical Epigenetics 4(1): 4. http://clinicalepigeneticsjournal.biomedcentral.com/articles/10.1186/1868-7083-4-4 (November 16, 2020) ; ﻿Gordon, David E. et al. 2020. “A SARS-CoV-2 Protein Interaction Map Reveals Targets for Drug …	0.03328	0.006763	0.014085	0.001174	2.93736	0.34092	301	0	0.950835	0.006016	0.078638	0.038967	1.52062	0.378514	148	133	0.754521	0.105271
FDB017803	1-Isothiocyanato-2-phenylethane	0	IZJDOKYDEWTZSO-UHFFFAOYSA-N	Broccoli|Cabbage|Chinese mustard|Horseradish|Watercress|White cabbage	Benzene and substituted derivatives	Anti-SARS-CoV-2: Preprint research suggests that this compound may inhibit the viral Mpro (3CLpro) protease of SARS-CoV-2. In addition to this it has been suggested that this compound is able to activate ERK and JNK signal transduction, which may lead to induction of stress-responsive genes. Specifically - activation of MAPK and ERKs has been reportedly induced by this compound. This is contrasti…	﻿Kono, Masakazu et al. 2008. “Inhibition of Human Coronavirus 229E Infection in Human Epithelial Lung Cells (L132) by Chloroquine: Involvement of P38 MAPK and ERK.” Antiviral Research 77(2): 150–52. https://www.sciencedirect.com/science/article/pii/S0166354207004597?via%3Dihub (November 16, 2020) ; ﻿He, Zhesheng et al. 2020. “Molecules Inhibit the Enzyme Activity of 3-Chymotrypsin-like Cysteine P…	0.033315	0	0.022535	0	2.61936	0.186921	344	0	0.923565	0.000853	0.04925	0.026337	1.81063	0.421397	198	0	0.849892	0.078442
FDB001195	Maltotetraose	0	LUEWUZLMQUOBSB-UHFFFAOYSA-N	Abiyuch|Acorn|Adzuki bean|Alfalfa|Allium (Onion)|Allspice|Almond|Amaranth|American cranberry|American pokeweed|Angelica|Anise|Apple|Apricot|Arrowroot|Asparagus|Avocado|Bamboo shoots|Banana|Barley|Bilberry|Bitter gourd|Black chokeberry|Black elderberry|Black salsify|Black walnut|Black-eyed pea|Blackcurrant|Borage|Brazil nut|Breadfruit|Broad bean|Broccoli|Brussel sprouts|Burdock|Butternut|Cabbage|C…	Organooxygen compounds/Carbohydrates and carbohydrate conjugates	Anti-Inflammatory: Inhibition of tumour necrosis factor (TNF-α) and nuclear factor-kappa B (NF-κB) (In the context of atheroscleorisis)	Shin, Soon Young et al. 2016. “Inhibition of PDGF-Induced Migration and TNF-α-Induced ICAM-1 Expression by Maltotetraose from Bamboo Stem Extract (BSE) in Mouse Vascular Smooth Muscle Cells.” Molecular nutrition & food research 60(9): 2086–97. http://www.ncbi.nlm.nih.gov/pubmed/27067145 (November 16, 2020).	0.0336	0.00165	0.035211	0.000235	2.16243	0.09761	301	0	0.867833	0.008738	0.032063	0.011599	2.18017	0.490399	25	9	0.899328	0.05421
FDB005595	Legumelin	0	ORDAZKGHSNRHTD-UXHICEINSA-N	Soy bean	Isoflavonoids/Rotenoids	N/A	N/A	0.036891	0.00489	0.054695	0.001643	1.90796	0.165539	121	0	0.808389	0.002732	0.024883	0.014554	2.67746	0.725606	26	9	0.942249	0.042236
FDB031279	alpha-tocopherol	0	GVJHHUAWPYXKBD-UHFFFAOYSA-N	Abiyuch|Acorn|Adzuki bean|Alfalfa|Allium (Onion)|Allspice|Almond|Amaranth|American cranberry|American pokeweed|Angelica|Anise|Apple|Apricot|Arrowroot|Asparagus|Avocado|Bamboo shoots|Banana|Barley|Bilberry|Bitter gourd|Black chokeberry|Black elderberry|Black salsify|Black walnut|Black-eyed pea|Blackcurrant|Borage|Brazil nut|Breadfruit|Broad bean|Broccoli|Brussel sprouts|Burdock|Butternut|Cabbage|C…	Prenol lipids/Quinone and hydroquinone lipids	Immunomodulatory: Alpha-tocopherol is a type of Vitamin E. Vitamin E deficiency is known to impair humoural and cellular immunity, and vitamin E itself has the ability to modulate host immune functions . As deficiency causes impairment, supplementation of alpha-tocopherol may improve these immune functions and provide a better response to SARS-CoV-2 infections.	﻿Moriguchi, Satoru, and Mikako Muraga. 2000. “Vitamin E and Immunity.” Vitamins & Hormones 59: 305–36. https://www.sciencedirect.com/science/article/pii/S0083672900590116?via%3Dihub (November 16, 2020).	0.039369	0.006211	0.022535	0.001643	2.61226	0.141313	300	0	0.922821	0.002534	0.068779	0.023474	1.5524	0.302144	25	10	0.791825	0.075282
FDB003586	Di-2-propenyl trisulfide	0	UBAXRAHSPKWNCX-UHFFFAOYSA-N	Soft-necked garlic	Organic trisulfides/NA	Anti-Fungal	Wang, Yaochen et al. 2019. “The Antifungal Effect of Garlic Essential Oil on Phytophthora Nicotianae and the Inhibitory Component Involved.” Biomolecules 9(10). http://www.ncbi.nlm.nih.gov/pubmed/31640228 (November 16, 2020).	0.042285	0.001992	0.079343	0.000469	1.62071	0.006583	157	0	0.733941	0.009403	0.022535	0.008451	2.61893	0.450563	25	7	0.943254	0.028559
FDB000452	Isopiperine	0	MXXWOMGUGJBKIW-YPCIICBESA-N	Pepper (Spice)	NA/NA Alkaloids and derivatives (superclass)	Anti-Inflammatory (SARS-CoV-2 related mediators): The spread of virus from lung to systemic circulation and excessive production pro-inflammatory mediator can damage different vital organs. Our study predicts that an array of the phytochemicals such as Isopiperine, Vicenin etc. found in the preparation of the Kadha, have significant binding affinity with the many of these inflammatory mediators o…	﻿Maurya, Dharmendra Kumar, and Deepak Sharma. 2020. “Evaluation of Traditional Ayurvedic Preparation for Prevention and Management of the Novel Coronavirus (SARS-CoV-2) Using Molecular Docking Approach.” https://chemrxiv.org/articles/Evaluation_of_Traditional_Ayurvedic_Preparation_for_Prevention_and_Management_of_the_Novel_Coronavirus_SARS-CoV-2_Using_Molecular_Docking_Approach/12110214/1?fbclid=…	0.043864	0.011849	0.072535	0.006573	1.68834	0.130792	87	0	0.753011	0.00382	0.026526	0.021362	2.60398	1.04292	25	8	0.938303	0.051359
FDB011866	Naringin	0	DFPMSGMNTNDNHN-ZPHOTFPESA-N	Common oregano|Common sage|Common thyme|Kumquat|Lemon|Lime|Mandarin orange (Clementine, Tangerine)|Pomegranate|Pummelo|Rosemary|Sweet orange	Fatty Acyls/Fatty acyl glycosides	Anti-Inflammatory: The averting impact of Naringin on pro-inhibitory cytokines (increased in COVID-19 infection) including Cyclooxygenase-II, Interleukin-6 and -1β, and Nitric oxide synthase is considerable	Dabaghian, Farid, Mahnaz Khanavi, and Mohammad M Zarshenas. 2020. “Bioactive Compounds with Possible Inhibitory Activity of Angiotensin-Converting Enzyme-II; a Gate to Manage and Prevent COVID-19.” Medical hypotheses 143: 109841. http://www.ncbi.nlm.nih.gov/pubmed/32425303 (November 16, 2020).	0.044215	0.016343	0.057042	0.008685	1.88363	0.228721	140	0	0.802754	0.022541	0.034272	0.030751	2.2296	1.44767	25	10	0.904079	0.092422
FDB001402	2-Methylthioribosyl-trans-zeatin	0	SZRPDCCEHVWOJX-UHFFFAOYSA-N	Common pea|Common wheat	Thioethers/Aryl thioethers	N/A	N/A	0.050213	0.011442	0.057746	0.010329	1.8192	0.050184	293	0	0.799397	0.026692	0.043662	0.012676	1.912	0.515734	29	14	0.862414	0.057072
FDB000662	Gallic acid	0	LNTHITQWFMADLM-UHFFFAOYSA-N	Allspice|Anise|Apple|Banana|Bilberry|Black walnut|Broccoli|Caraway|Cardamom|Carob|Carrot|Cashew nut|Cauliflower|Ceylon cinnamon|Cloudberry|Cloves|Coffee|Common grape|Common oregano|Common sage|Common thyme|Common walnut|Coriander|Corn|Cucumber|Cumin|Date|Dill|Eggplant|European chestnut|Evening primrose|Fennel|Fenugreek|Garden onion|Garden rhubarb|Garden tomato|Garden tomato (var.)|Garlic|German c…	Benzene and substituted derivatives/Benzoic acids and derivatives	Anti-SARS-CoV-2: Molecular docking model of gallic acid binds ACE2 receptor, potentially blocking binding of receptor by SARS-CoV-2, reducing viral entry and cellular infection.	﻿Maurya, Vimal K. et al. 2020. “Structure-Based Drug Designing for Potential Antiviral Activity of Selected Natural Products from Ayurveda against SARS-CoV-2 Spike Glycoprotein and Its Cellular Receptor.” VirusDisease 31(2): 179–93. http://link.springer.com/10.1007/s13337-020-00598-8 (November 16, 2020).	0.052374	0.002151	0.044601	0.000235	2.11816	0.237326	160	0	0.852014	0.010784	0.061502	0.019718	1.7246	0.330227	25	6	0.816491	0.057025
FDB001461	6-Oxocamphor	0	DGHHQBMTXTWTJV-BQAIUKQQSA-N	Common sage	Camptothecins/NA	N/A	N/A	0.053238	0.010537	0.078404	0.007277	1.62817	0.110688	135	0	0.73609	0.003153	0.03615	0.015258	2.31132	0.488299	25	10	0.912576	0.044947
FDB012055	Acetovanillone	0	DFYRUELUNQRZTB-UHFFFAOYSA-N	Corn|Garden onion	Organooxygen compounds/Carbonyl compounds	Anti-COVID: Acetovanillone (Apomycin) is considered an NADPH-oxidase inhibitor, thereby blocking damaging ROS production. Studies have shown that NADPH oxidase 2 (Nox2) activation markers are high in COVID-19 patients, and increased in patients with severe disease and a predictor of thrombotic events. Therefore Acetovanillone may be therapeutic in this instance.	﻿Violi, Francesco et al. 2020. “Nox2 Activation in Covid-19.” Redox Biology 36: 101655. https://www.sciencedirect.com/science/article/pii/S2213231720308600?via%3Dihub (November 16, 2020) ; ﻿Baker, Jacyn, Norton M. Mock, and Andrey A. AVer’yanov. 2018. “Redox- and Bio-Activity of Apocynin (Acetovanillone) in Plants, a Plant Phenolic That Alleviates Symptoms of Autoimmune Diseases in Animals.” Free…	0.055732	0.002252	0.048826	0.000235	2.03044	0.089476	213	0	0.831277	0.00362	0.063615	0.021596	1.71084	0.363733	25	8	0.802287	0.066603
FDB000624	Fisetin	0	XHEFDIBZLJXQHF-UHFFFAOYSA-N	Soy bean	Flavonoids/Flavones	Anti-SARS-CoV-2: Fisetin exhibited (-7.0 kcal/mol) binding anity with 6LU7 (SARS-CoV-2 protease)	Jin, Zhenming et al. 2020. “Structure of Mpro from SARS-CoV-2 and Discovery of Its Inhibitors.” Nature 582(7811): 289–93. http://www.nature.com/articles/s41586-020-2223-y (November 16, 2020).	0.057101	0.008068	0.076995	0.002582	1.64259	0.082573	153	0	0.740214	0.006283	0.042347	0.025211	2.043	0.809194	26	10	0.881019	0.082973
FDB012204	Procyanidin B2	0	XFZJEEAOWLFHDH-NFJBMHMQSA-N	American cranberry|Apple|Apricot|Avocado|Banana|Bilberry|Broad bean|Carrot|Ceylon cinnamon|Chickpea|Chinese cinnamon|Cinnamon|Cloudberry|Cocoa bean|Common bean|Common buckwheat|Common grape|Common pea|Common wheat|Cucurbita (Gourd)|Custard apple|Eggplant|European plum|Fig|Garden tomato (var.)|Green bean|Green bell pepper|Green zucchini|Guava|Italian sweet red pepper|Japanese persimmon|Kiwi|Lentil…	Flavonoids/Biflavonoids and polyflavonoids	Anti-SARS-CoV-2: Interferance with the clathrin-dependent endocytosis mechanism	Wang, Yaochen et al. 2019. “The Antifungal Effect of Garlic Essential Oil on Phytophthora Nicotianae and the Inhibitory Component Involved.” Biomolecules 9(10). http://www.ncbi.nlm.nih.gov/pubmed/31640228 (November 16, 2020).	0.062729	0.031994	0.09061	0.033803	1.52817	0.232514	32	0	0.706374	0.053876	0.043427	0.030282	2.14	0.823693	32	0	0.876444	0.095069
FDB000657	Galangin	0	VCCRNZQBSJXYJD-UHFFFAOYSA-N	Apple|Broccoli|Lemon|Lingonberry|Mexican oregano|Parsley|Sweet orange|Tea	Flavonoids/Flavones	Anti-SARS-CoV-2: Evidence from a molecular docking study (preprint) suggests that galangin showed good affinity for investigated receptors. These included: the post fusion core of 2019-nCoV S2 subunit, SARS-CoV-2 receptor-binding domain complexed with ACE2 and the 3C-like protease (3CLpro) in complex with an inhibitor N3.	﻿Utomo, Rohmad Yudi, Muthi’ Ikawati, and Edy Meiyanto. 2020. “Revealing the Potency of Citrus and Galangal Constituents to Halt SARS-CoV-2 Infection.” https://www.preprints.org/manuscript/202003.0214/v1 (November 16, 2020).	0.064507	0.014057	0.043662	0.005164	2.04042	0.150346	112	0	0.836922	0.006484	0.095305	0.038263	1.33011	0.366851	25	4	0.705588	0.104942
FDB002608	Daidzein	0	ZQSIJRDFPHDXIC-UHFFFAOYSA-N	Abiyuch|Acorn|Adzuki bean|Alfalfa|Allium (Onion)|Allspice|Almond|Amaranth|American cranberry|American pokeweed|Angelica|Anise|Apple|Apricot|Arrowroot|Asparagus|Avocado|Bamboo shoots|Banana|Barley|Bilberry|Bitter gourd|Black chokeberry|Black elderberry|Black salsify|Black walnut|Black-eyed pea|Blackcurrant|Borage|Brazil nut|Breadfruit|Broad bean|Broccoli|Brussel sprouts|Burdock|Butternut|Cabbage|C…	Isoflavonoids/Isoflav-2-enes	Antioxidant/antiviral: Research indicating the Diadzein is broadly antiviral and regulates viral replication by signal transduction of 5-lipoxygenase products.	﻿Horio, Yuka et al. 2020. “Induction of a 5-Lipoxygenase Product by Daidzein Is Involved in the Regulation of Influenza Virus Replication.” Journal of clinical biochemistry and nutrition 66(1): 36–42. http://www.ncbi.nlm.nih.gov/pubmed/32001954 (November 16, 2020).	0.067002	0.01102	0.060329	0.00446	1.8219	0.034481	219	0	0.787895	0.010406	0.074413	0.02723	1.5003	0.316754	25	10	0.767107	0.074712
FDB017816	Dihydrocapsaicin	0	XJQPQKLURWNAAH-UHFFFAOYSA-N	Green bell pepper|Orange bell pepper|Pepper (C. annuum)|Pepper (C. frutescens)|Red bell pepper|Yellow bell pepper	Phenols/Methoxyphenols	Antioxidant: Dihydrocapsaicin has been shown to have antioxidant activity. Specifically evidence of positive results in 2,2-diphenyl-1-picrylhydrazyl (DPPH) activity assay.	﻿Nascimento, Patrícia et al. 2014. “Quantification, Antioxidant and Antimicrobial Activity of Phenolics Isolated from Different Extracts of Capsicum Frutescens (Pimenta Malagueta).” Molecules 19(4): 5434–47. http://www.mdpi.com/1420-3049/19/4/5434 (November 16, 2020).	0.068944	0.040861	0.053286	0.023709	1.94819	0.370309	19	0	0.817439	0.061533	0.089202	0.070423	1.46839	0.812559	19	0	0.723753	0.203558
FDB030742	coumarin	0	ZYGHJZDHTFUPRJ-UHFFFAOYSA-N	Abiyuch|Acorn|Adzuki bean|Alfalfa|Allium (Onion)|Allspice|Almond|Amaranth|American cranberry|American pokeweed|Angelica|Anise|Apple|Apricot|Arrowroot|Asparagus|Avocado|Bamboo shoots|Banana|Barley|Bilberry|Bitter gourd|Black chokeberry|Black elderberry|Black salsify|Black walnut|Black-eyed pea|Blackcurrant|Borage|Brazil nut|Breadfruit|Broad bean|Broccoli|Brussel sprouts|Burdock|Butternut|Cabbage|C…	Coumarins and derivatives	Anti-COVID: Coumarin is considered an anticoagulant - this could be positive for the treatment of COVID-19 as patients develop a pro-coagulative state that has been suggested to be caused by virus-induced endothelial dysfunction, cytokine storm and complement cascade hyperactivation .	﻿Carfora, Vincenzo et al. 2020. “Anticoagulant Treatment in COVID-19: A Narrative Review.” Journal of Thrombosis and Thrombolysis: 1–7. http://link.springer.com/10.1007/s11239-020-02242-0 (November 16, 2020) ; ﻿Kasperkiewicz, Kinga et al. 2020. “Antagonists of Vitamin K—Popular Coumarin Drugs and New Synthetic and Natural Coumarin Derivatives.” Molecules 25(6): 1465. https://www.mdpi.com/1420-304…	0.073929	0.012279	0.097418	0.005634	1.46756	0.076821	301	0	0.687442	0.013466	0.056103	0.026761	1.71928	0.422705	199	0	0.830527	0.077894
FDB013862	Emodin	0	RHMXXJGYXNZAPX-UHFFFAOYSA-N	Dock|Garden rhubarb|Sorrel	Anthracenes/Anthraquinones	Anti-SARS-CoV-2: Emodin blocks the SARS coronavirus spike protein and angiotensin-converting enzyme 2 interaction	Ho, Tin-Yun et al. 2007. “Emodin Blocks the SARS Coronavirus Spike Protein and Angiotensin-Converting Enzyme 2 Interaction.” Antiviral Research 74(2): 92–101. https://www.sciencedirect.com/science/article/pii/S0166354206001215?casa_token=4kTwNIDHviEAAAAA:VBTE1l5DaGIbXHRGn68PNmBfP2D-dMphGwZBZf3Q8SfMEyAtO5tcifzQkvNqTnVr6fyI81SBpC0 (November 16, 2020).	0.074636	0.009387	0.093427	0.003052	1.46646	0.065564	288	0	0.707554	0.009335	0.059624	0.028873	1.84152	0.550554	25	6	0.837618	0.084033
FDB020986	4-Hydroxy-2-nonenal	0	JVJFIQYAHPMBBX-FNORWQNLSA-N	Abiyuch|Acorn|Adzuki bean|Alfalfa|Allium (Onion)|Allspice|Almond|Amaranth|American cranberry|American pokeweed|Angelica|Anise|Apple|Apricot|Arrowroot|Asparagus|Avocado|Bamboo shoots|Banana|Barley|Bilberry|Bitter gourd|Black chokeberry|Black elderberry|Black salsify|Black walnut|Black-eyed pea|Blackcurrant|Borage|Brazil nut|Breadfruit|Broad bean|Broccoli|Brussel sprouts|Burdock|Butternut|Cabbage|C…	Fatty Acyls/Fatty alcohols	Mediator of Oxidative Stress (Potentially Pro-COVID): There is increasing evidence that aldehydic molecules generated endogenously during the process of lipid peroidation are causally involved in most of the pathophysiological effects associated with oxidative stress in cells and tissues. 4-Hydroxy-2-nonenal (HNE), among them, is believed to be largely responsible for cytopathological effects obs…	Uchida, Koji. 2003. “4-Hydroxy-2-Nonenal: A Product and Mediator of Oxidative Stress.” Progress in Lipid Research 42(4): 318–43. https://www.sciencedirect.com/science/article/pii/S0163782703000146?casa_token=eRt3RsI9AL8AAAAA:fIOI9ZdLEET06B2woRAc-BL1mw6bswl8A-pQpHhv7Ev9JnIaJdsea8aB_m_rnMvhQDarRxFQfuo (November 16, 2020).	0.076199	0.010869	0.072535	0.003756	1.69277	0.078646	193	0	0.754229	0.00139	0.080047	0.031455	1.51375	0.488603	25	10	0.768801	0.094112
FDB016337	Rhamnoisoliquiritin	0	DXDRHHKMWQZJHT-FPYGCLRLSA-N	Tea	Linear 1,3-diarylpropanoids/Chalcones and dihydrochalcones	N/A	N/A	0.07773	0.009981	0.0723	0.003756	1.70157	0.026479	200	0	0.756632	0.002407	0.083568	0.026526	1.39558	0.416219	26	9	0.757042	0.077492
FDB031220	trehalose	0	HDTRYLNUVZCQOY-LIZSDCNHSA-N	Abiyuch|Acorn|Adzuki bean|Alfalfa|Allium (Onion)|Allspice|Almond|Amaranth|American cranberry|American pokeweed|Angelica|Anise|Apple|Apricot|Arrowroot|Asparagus|Avocado|Bamboo shoots|Banana|Barley|Bilberry|Bitter gourd|Black chokeberry|Black elderberry|Black salsify|Black walnut|Black-eyed pea|Blackcurrant|Borage|Brazil nut|Breadfruit|Broad bean|Broccoli|Brussel sprouts|Burdock|Butternut|Cabbage|C…	Organooxygen compounds/Carbohydrates and carbohydrate conjugate	Anti-Viral: Trehalose, a natural glucose disaccharide, is known to impair viral function through the autophagy system	Martinon, Daisy, Vanessa F Borges, Angela C Gomez, and Kenichi Shimada. 2020. “Potential Fast COVID-19 Containment With Trehalose.” Frontiers in immunology 11: 1623. http://www.ncbi.nlm.nih.gov/pubmed/32733488 (November 16, 2020).	0.081477	0.026274	0.097183	0.025352	1.47094	0.140835	308	0	0.688514	0.009213	0.06831	0.02723	1.39235	0.356942	27	12	0.789901	0.083583
FDB002515	Osthol	0	MBRLOUHOWLUMFF-UHFFFAOYSA-N	Carrot|Dill|Lemon|Mandarin orange (Clementine, Tangerine)|Parsley|Sweet orange|Wild carrot|Wild celery	Coumarins and derivatives/NA	Anti-SARS-CoV-2: Osthole and kellerin, falling under the class of simple coumarins, were seen to bind to the active site of Mpro as illustrated by their respective docked poses along with their corresponding 2D interaction plots	Lyndem, Sona, Sharat Sarmah, Sourav Das, and Atanu Singha Roy. “In Silico Screening of Naturally Occurring Coumarin Derivatives for the Inhibition of the Main Protease of SARS-CoV-2.” https://doi.org/10.26434/chemrxiv.12234728.v1 (November 16, 2020).	0.087803	0.024144	0.083568	0.013146	1.58033	0.044894	251	0	0.722116	0.048938	0.092254	0.044346	1.30402	0.45799	26	8	0.736592	0.118591
FDB012942	Fabatin	0	PYHRZPFZZDCOPH-QXGOIDDHSA-N	Broad bean	Benzene and substituted derivatives/Phenethylamines	Anti-Microbial: Fabatins were active against both Gram-negative and Gram-positive bacteria, but were inactive against the yeasts Saccharomyces cerevisiae and Candida albicans.	Chattopadhyay, Debprasad, and Trailokya Naik. 2007. “Antivirals of Ethnomedicinal Origin: Structure-Activity Relationship and Scope.” Mini-Reviews in Medicinal Chemistry 7(3): 275–301. http://www.eurekaselect.com/openurl/content.php?genre=article&issn=1389-5575&volume=7&issue=3&spage=275 (November 16, 2020).	0.090801	0.033626	0.088028	0.028169	1.55662	0.142735	301	0	0.715024	0.0784	0.093662	0.040141	1.28165	0.416066	25	10	0.737405	0.100004
ADDITIONAL WIKI PATHWAYS
ID	Name	Approved	InChIKey	Foods	Class (Class/Subclass)	Mechanism	Reference	GeoMean(r_vals(neg)_median)	GeoMean(r_vals(neg)_MAD)	wiki_r_vals(neg)_median	wiki_r_vals(neg)_MAD	wiki_Normalized_correlation_median	wiki_Normalized_correlation_MAD	wiki_Gene_connection_counts_median	wiki_Gene_connection_counts_MAD	wiki_Probability_estimate_median	wiki_Probability_estimate_MAD	aggr_r_vals(neg)_median	aggr_r_vals(neg)_MAD	aggr_Normalized_correlation_median	aggr_Normalized_correlation_MAD	aggr_Gene_connection_counts_median	aggr_Gene_connection_counts_MAD	aggr_Probability_estimate_median	aggr_Probability_estimate_MAD
FDB001083	Bromelains	0	QGMRQYFBGABWDR-UHFFFAOYSA-M	Pineapple	Diazines / Pyrimidines and pyrimidine derivatives	Bromelain found to diminish expression of ACE2 and TMPRSS2, reducing opportunity for viral entry into host cells.	Sagar, Satish et al. 2020. “Bromelain Inhibits SARS-CoV-2 Infection in VeroE6 Cells.” bioRxiv: 2020.09.16.297366. https://www.biorxiv.org/content/10.1101/2020.09.16.297366v1.full (November 16, 2020).	0.040806	0.007127	0.013615	0.000469	3.00481	0.367695	304	0	0.955294	0.006575	0.1223	0.10819	0.869005	0.63141	28	8	0.603228	0.288951
FDB012837	Rotenone	0	JUVIOZPCNVVQFO-HBGVWJBISA-N	Jicama	Isoflavonoids/Rotenoids	Negative: It has been shown that Rotenone is an inhibitor of the mitochondrial complex I . This may link to a possible mechanism in COVID-19 treatment as research has shown that complex I is downregulated by COVID-19 infection . However, as both compound and disease in this case may be reducing the function of complex I, the supplementation of this compound to COVID-19 patients may worsen their d…	﻿Guzzi, Pietro H, Daniele Mercatelli, Carmine Ceraolo, and Federico M Giorgi. 2020. “Master Regulator Analysis of the SARS-CoV-2/Human Interactome.” Journal of clinical medicine 9(4). http://www.ncbi.nlm.nih.gov/pubmed/32244779 (November 16, 2020) ; ﻿Mohammed, Fareed et al. 2020. “Rotenone‐induced Reactive Oxygen Species Signal the Recruitment of STAT3 to Mitochondria.” FEBS Letters 594(9): 1403–…	0.046025	0.006623	0.020188	0.000939	2.70743	0.341575	300	0	0.932269	0.010735	0.10493	0.046714	1.27072	0.305122	25	10	0.677269	0.132732
FDB000633	Kaempferol	0	IYRMWMYZSQPJKC-UHFFFAOYSA-N	Abiyuch|Acorn|Adzuki bean|Alfalfa|Allium (Onion)|Allspice|Almond|Amaranth|American cranberry|American pokeweed|Angelica|Anise|Apple|Apricot|Arrowroot|Asparagus|Avocado|Bamboo shoots|Banana|Barley|Bilberry|Bitter gourd|Black chokeberry|Black elderberry|Black salsify|Black walnut|Black-eyed pea|Blackcurrant|Borage|Brazil nut|Breadfruit|Broad bean|Broccoli|Brussel sprouts|Burdock|Butternut|Cabbage|C…	Flavonoids /Flavones	Predicted to occupy the active site of SARS-CoV 3CLpro so therefore may also occupy that of SARS-CoV-2 3CLpro.	Jo, Seri, Suwon Kim, Dong Hae Shin, and Mi-Sun Kim. 2020. “Inhibition of SARS-CoV 3CL Protease by Flavonoids.” Journal of enzyme inhibition and medicinal chemistry 35(1): 145–51. http://www.ncbi.nlm.nih.gov/pubmed/31724441 (November 16, 2020).	0.046925	0.009218	0.021127	0.001174	2.68216	0.328737	199	0	0.92987	0.010404	0.104225	0.072395	1.24989	0.395705	32	17	0.697538	0.181608
FDB016982	Zein	0	YBYRMVIVWMBXKQ-UHFFFAOYSA-N	Corn	Benzene and substituted derivatives /NA	N/A	N/A	0.050215	0.005604	0.012911	0.000235	3.03228	0.382006	307	0	0.956998	0.00682	0.195305	0.133803	0.716937	0.426507	25	10	0.458773	0.164776
FDB030664	all-trans-lycopene	1	OAIJSZIZWZSQBC-GYZMGTAESA-N	Abiyuch|Acorn|Adzuki bean|Alfalfa|Allium (Onion)|Allspice|Almond|Amaranth|American cranberry|American pokeweed|Angelica|Anise|Apple|Apricot|Arrowroot|Asparagus|Avocado|Bamboo shoots|Banana|Barley|Bilberry|Bitter gourd|Black chokeberry|Black elderberry|Black salsify|Black walnut|Black-eyed pea|Blackcurrant|Borage|Brazil nut|Breadfruit|Broad bean|Broccoli|Brussel sprouts|Burdock|Butternut|Cabbage|C…	Prenol lipids/Tetraterpenoids	Lycopene has been reported to reduce the effects of oxidative stress.	Chen, Jinyao, Yang Song, and Lishi Zhang. 2013. “Effect of Lycopene Supplementation on Oxidative Stress: An Exploratory Systematic Review and Meta-Analysis of Randomized Controlled Trials.” Journal of medicinal food 16(5): 361–74. http://www.ncbi.nlm.nih.gov/pubmed/23631493 (November 16, 2020).	0.060292	0.005878	0.026291	0.000704	2.45189	0.234885	240	0	0.904141	0.007497	0.138263	0.049061	0.984875	0.262286	25	9	0.588643	0.116893
FDB011872	Arachidonic acid	0	YZXBAPSDXZZRGB-DOFZRALJSA-N	Adzuki bean|Alfalfa|Allium (Onion)|Almond|Apple|Apricot|Asparagus|Avocado|Bamboo shoots|Banana|Barley|Bilberry|Black salsify|Blackcurrant|Brazil nut|Broccoli|Brussel sprouts|Carrot|Cashew nut|Cassava|Cauliflower|Chanterelle|Chayote|Cherimoya|Chervil|Chickpea|Chicory|Chinese cabbage|Chives|Cinnamon|Coconut|Coffee|Common bean|Common buckwheat|Common cabbage|Common pea|Coriander|Corn|Cottonseed|Cucu…	Fatty Acyls/Fatty acids and conjugates	Anti-inflammatory: Free arachidonic acid (ARA) modulates the function of ion channels, several receptors and enzymes, via activation as well as inhibition. ARA greatly enhance the functional activity of γ-amino butyric acid receptor (GABA-R) . Previous studies have shown that GABA has anti-inflammatory effect and that GABA receptors (GABA-Rs) prevented the Murine hepatitis virus strain 1 (coronav…	﻿Tian, Jide, Blake Middleton, and Daniel L. Kaufman. 2020. “GABA Administration Prevents Severe Illness and Death Following Coronavirus Infection in Mice.” bioRxiv: 2020.10.04.325423. https://www.biorxiv.org/content/10.1101/2020.10.04.325423v1 (November 16, 2020) ; ﻿Tallima, Hatem, and Rashika El Ridi. 2018. “Arachidonic Acid: Physiological Roles and Potential Health Benefits - A Review.” Journal…	0.065929	0.010938	0.039906	0.003052	2.11762	0.067485	301	0	0.862461	0.001608	0.10892	0.039202	1.15707	0.266605	25	10	0.6641	0.114728
FDB003693	Salicylates	0	YGSDEFSMJLZEOE-UHFFFAOYSA-M	Allspice|Almond|Anise|Apple|Apricot|Arabica coffee|Arrowroot|Avocado|Barley|Black-eyed pea|Blackcurrant|Brazil nut|Broad bean|Broccoli|Brussel sprouts|Cabbage|Caraway|Cardamom|Carob|Ceylon cinnamon|Chickpea|Chicory|Chives|Cloves|Cocoa bean|Coconut|Colorado pinyon|Common bean|Common buckwheat|Common grape|Common hazelnut|Common thyme|Common walnut|Corn|Cumin|Date|Dill|European plum|Fennel|Fenugree…	Benzene and substituted derivatives/Benzoic acids and derivatives	Anti-inflammatory effect reported via inhibition of cyclooxygenase-2 (COX2) at the transcriptional level.	Wu, Kenneth K. 2000. Aspirin and Salicylate An Old Remedy With a New Twist. http://www.circulationaha.org (November 16, 2020).	0.066256	0.021759	0.028638	0.005634	2.39141	0.007458	301	0	0.897125	0.002032	0.153286	0.084038	0.891616	0.37804	26	11	0.559945	0.193222
FDB030010	Kynurenine	0	YGPSJZOEDVAXAB-UHFFFAOYSA-N	Barley|Broccoli|Carrot|Spinach|Sunburst squash (pattypan squash)|Yellow zucchini	Organooxygen compounds/Carbonyl compounds	Diverse biological functions, including relaxing and dilating blood vessels during inflammation and regulating the immune response in an immunosuppressive manner.	﻿Wang, Yutang et al. 2010. “Kynurenine Is an Endothelium-Derived Relaxing Factor Produced during Inflammation.” Nature medicine 16(3): 279–85. http://www.ncbi.nlm.nih.gov/pubmed/20190767 (November 16, 2020) ; ﻿Mándi, Yvette, and László Vécsei. 2012. “The Kynurenine System and Immunoregulation.” Journal of neural transmission (Vienna, Austria : 1996) 119(2): 197–209. http://www.ncbi.nlm.nih.gov/pu…	0.073707	0.014178	0.048826	0.00446	2.02662	0.015324	224	0	0.83723	0.004714	0.111268	0.04507	1.18803	0.316799	25	10	0.664361	0.120634
FDB030715	catechol	0	YCIMNLLNPGFGHC-UHFFFAOYSA-N	Abiyuch|Acorn|Adzuki bean|Alfalfa|Allium (Onion)|Allspice|Almond|Amaranth|American cranberry|American pokeweed|Angelica|Anise|Apple|Apricot|Arrowroot|Asparagus|Avocado|Bamboo shoots|Banana|Barley|Bilberry|Bitter gourd|Black chokeberry|Black elderberry|Black salsify|Black walnut|Black-eyed pea|Blackcurrant|Borage|Brazil nut|Breadfruit|Broad bean|Broccoli|Brussel sprouts|Burdock|Butternut|Cabbage|C…	Phenols/Benzenediols	Catechol (Pyrocatechol) suppresses lipopolysaccharide-induced inflammatory responses by inhibiting nuclear factor kappa-light-chain-enhancer of activated B cells (NFκB) and activating nuclear factor erythroid 2 (NFE2)-related factor 2 (Nrf2), which positively augments the effect of oxidative stress in cells.	﻿Ma, Qiang. 2013. “Role of Nrf2 in Oxidative Stress and Toxicity.” Annual review of pharmacology and toxicology 53: 401–26. http://www.ncbi.nlm.nih.gov/pubmed/23294312 (November 16, 2020) ; ﻿Funakoshi-Tago, Megumi et al. 2020. “Pyrocatechol, a Component of Coffee, Suppresses LPS-Induced Inflammatory Responses by Inhibiting NF-ΚB and Activating Nrf2.” Scientific reports 10(1): 2584. http://www.ncb…	0.080637	0.011643	0.05	0.002817	1.95048	0.051691	259	0	0.826409	0.002643	0.130047	0.048122	1.02677	0.287345	25	10	0.601761	0.128879
FDB030066	Osmium	0	SYQBFIAQOQZEGI-UHFFFAOYSA-N	Broccoli|Carrot|Cucumber|Dill|Eggplant|Garden onion|Garden tomato|Garlic|Green bell pepper|Green zucchini|Italian sweet red pepper|Japanese pumpkin|Orange bell pepper|Parsnip|Potato|Red beetroot|Red bell pepper|Romaine lettuce|Spinach|Sunburst squash (pattypan squash)|Turnip|White cabbage|Yellow bell pepper|Yellow zucchini	Homogeneous transition metal compounds	N/A	N/A	0.082646	0.011282	0.066432	0.00493	1.79888	0.025743	251	0	0.770245	0.011906	0.102817	0.025822	1.26935	0.288213	26	11	0.682434	0.075368
FDB014733	Pyridine	0	JUJWROOIHBZHMG-UHFFFAOYSA-N	Green bell pepper|Kohlrabi|Orange bell pepper|Papaya|Pepper (C. annuum)|Peppermint|Potato|Red bell pepper|Tea|Yellow bell pepper	Pyridines and derivatives/NA	Several pyridine derivatives reported to bind SARS-CoV-2 3CLpro, no evidence for pyridine specifically.	﻿Ghaleb, Adib et al. 2020. “In Silico Molecular Investigations of Pyridine N-Oxide Compounds as Potential Inhibitors of SARS-CoV-2: 3D QSAR, Molecular Docking Modeling, and ADMET Screening.” Journal of Biomolecular Structure and Dynamics: 1–11. https://www.tandfonline.com/doi/full/10.1080/07391102.2020.1808530 (November 16, 2020) ; ﻿McKee, Dwight L. et al. 2020. “Candidate Drugs against SARS-CoV-…	0.090826	0.016723	0.066432	0.008216	1.82524	0.035178	292	0	0.773507	0.023753	0.124178	0.034038	1.09133	0.212967	26	11	0.668141	0.088648
FDB001062	Cellulase	0	XLNZEKHULJKQBA-UHFFFAOYSA-N	Cocoa bean|Garden tomato (var.)	Organic dithiophosphoric acids and derivatives/Dithiophosphate O-esters	N/A	N/A	0.096899	0.026588	0.074883	0.006338	1.59791	0.060474	698	0	0.74468	0.000974	0.125389	0.111539	0.963888	0.91793	698	0	0.645771	0.282533
FDB017002	Myricetin 3-digalactoside	0	IKMDFBPHZNJCSN-UHFFFAOYSA-N	American cranberry	Flavonoids/Flavone	Antioxidant: Main nutraceutical activity of this compound is attributed to its antioxidant activity. Evidence of scavenging activity extends to a number of radicals including hydroxyl free radicals and oxygen-centred galvinoxyl radicals, among others . This is compared to high levels of oxidative stress in COVID-19, which have been associated with amplification of the cytokine storm and coagulopa…	﻿Cecchini, Rubens, and Alessandra Lourenço Cecchini. 2020. “SARS-CoV-2 Infection Pathogenesis Is Related to Oxidative Stress as a Response to Aggression.” Medical Hypotheses 143: 110102. https://www.sciencedirect.com/science/article/pii/S0306987720317540 (November 16, 2020) ; ﻿Semwal, Deepak, Ruchi Semwal, Sandra Combrinck, and Alvaro Viljoen. 2016. “Myricetin: A Dietary Molecule with Diverse Bio…	0.103629	0.01811	0.094131	0.015023	1.48798	0.108382	125	0	0.693894	0.008463	0.114085	0.021831	1.2289	0.154328	26	10	0.656543	0.045229
FDB003958	Methylamine	0	BAVYZALUXZFZLV-UHFFFAOYSA-N	Apple|Barley|Cabbage|Carrot|Common grape|Corn|French plantain|Soy bean|Spinach|Tea|White cabbage|Wild carrot|Wild celery	Organonitrogen compounds/Amines	Anti-SARS-CoV-2: There is evidence that Methylamine, an amine oxidase substrate, stimulates glucose uptake by increasing glucose transporter type 4 (GLUT4) recruitment to cell surface . This may counteract changes during COVID-19 where it has been shown that loss of ACE2 causes a reduction of GLUT4 .	﻿Takeda, Masao et al. 2013. “Loss of ACE2 Exaggerates High-Calorie Diet-Induced Insulin Resistance by Reduction of GLUT4 in Mice.” Diabetes 62(1): 223–33. http://www.ncbi.nlm.nih.gov/pubmed/22933108 (November 16, 2020) ; ﻿Enrique-Tarancón, G et al. 2000. “Substrates of Semicarbazide-Sensitive Amine Oxidase Co-Operate with Vanadate to Stimulate Tyrosine Phosphorylation of Insulin-Receptor-Substrat…	0.104294	0.01043	0.092488	0.003286	1.49352	0.010728	300	0	0.698982	0.02261	0.117606	0.033099	1.14219	0.304039	25	10	0.678319	0.069906
FDB030699	biochanin-A	0	WUADCCWRTIWANL-UHFFFAOYSA-N	Abiyuch|Acorn|Adzuki bean|Alfalfa|Allium (Onion)|Allspice|Almond|Amaranth|American cranberry|American pokeweed|Angelica|Anise|Apple|Apricot|Arrowroot|Asparagus|Avocado|Bamboo shoots|Banana|Barley|Bilberry|Bitter gourd|Black chokeberry|Black elderberry|Black salsify|Black walnut|Black-eyed pea|Blackcurrant|Borage|Brazil nut|Breadfruit|Broad bean|Broccoli|Brussel sprouts|Burdock|Butternut|Cabbage|C…	Isoflavonoids/O-methylated isoflavonoids	Anti-inflammatory: Biochanin A (BCA), may bind aryl hydrocarbon receptor and disrupt the pathway. Also known to suppress NFκB driven interleukin-6 (IL-6) expression . This is relevant to COVID-19 and the cytokine storm in severe patients, where elevated IL-6 is recognised as one of the main indicators of this state . Studies have shown other anti-inflammatory activities which include: inhibition …	﻿Kole, Labanyamoy et al. 2011. “Biochanin-A, an Isoflavon, Showed Anti-Proliferative and Anti-Inflammatory Activities through the Inhibition of INOS Expression, P38-MAPK and ATF-2 Phosphorylation and Blocking NFκB Nuclear Translocation.” European Journal of Pharmacology 653(1–3): 8–15. https://www.sciencedirect.com/science/article/pii/S0014299910011969?via%3Dihub (November 16, 2020) ; ﻿Wang, Wenb…	0.105176	0.017968	0.08615	0.007277	1.56601	0.105119	131	0	0.717845	0.002202	0.128404	0.044366	1.17045	0.322046	27	10	0.649843	0.081889
FDB012596	Histamine	0	CLIIFKDZHSLNHY-UHFFFAOYSA-N	Abiyuch|Acorn|Adzuki bean|Alfalfa|Allium (Onion)|Allspice|Almond|Amaranth|American cranberry|American pokeweed|Angelica|Anise|Apple|Apricot|Arrowroot|Asparagus|Avocado|Bamboo shoots|Banana|Barley|Bilberry|Bitter gourd|Black chokeberry|Black elderberry|Black salsify|Black walnut|Black-eyed pea|Blackcurrant|Borage|Brazil nut|Breadfruit|Broad bean|Broccoli|Brussel sprouts|Burdock|Butternut|Cabbage|C…	Organonitrogen compounds/Amines	Negative: Histamine is a mediator of the immune response. Its mechanism of action works via G protein coupled receptors (H1R, H2R, H3R, H4R) expressed on many immune cells. As binding of histamine to H1R induces the production of proinflammatory IL-6, which is already at high levels in COVID-19 patients, this compound may have negative effects for patients.	Eldanasory, Omar Abdelhay, Khalid Eljaaly, Ziad A Memish, and Jaffar A Al-Tawfiq. 2020. “Histamine Release Theory and Roles of Antihistamine in the Treatment of Cytokines Storm of COVID-19.” Travel medicine and infectious disease 37: 101874. http://www.ncbi.nlm.nih.gov/pubmed/32891724 (November 16, 2020).	0.106266	0.024049	0.080986	0.007512	1.60808	0.051192	380	0	0.730277	0.038962	0.139437	0.076995	0.98617	0.393889	25	10	0.584601	0.172007
FDB031022	N-acetyl--D-glucosamine	0	OVRNDRQMDRJTHS-CBQIKETKSA-N	Abiyuch|Acorn|Adzuki bean|Alfalfa|Allium (Onion)|Allspice|Almond|Amaranth|American cranberry|American pokeweed|Angelica|Anise|Apple|Apricot|Arrowroot|Asparagus|Avocado|Bamboo shoots|Banana|Barley|Bilberry|Bitter gourd|Black chokeberry|Black elderberry|Black salsify|Black walnut|Black-eyed pea|Blackcurrant|Borage|Brazil nut|Breadfruit|Broad bean|Broccoli|Brussel sprouts|Burdock|Butternut|Cabbage|C…	Organooxygen compounds/Carbohydrates and carbohydrate conjugates	N-acetyl-D-glucosamine (NAG) has been shown to decrease expression of vascular endothelial growth factor (VEGF), and to promote the expression of IL-2 and interferon gamma (IFN-γ) . Clinical studies have shown that lower circulating IFN-γ is a risk factor for lung fibrosis in COVID-19 patients, so NAG may provide therapeutic benefit through this mechanism.	﻿Hu, Zhong-Jie et al. 2020. “Lower Circulating Interferon-Gamma Is a Risk Factor for Lung Fibrosis in COVID-19 Patients.” Frontiers in Immunology 11: 2348. https://www.frontiersin.org/article/10.3389/fimmu.2020.585647/full (November 16, 2020) ; ﻿XU, WENHUA et al. 2012. “Chitooligosaccharides and N-Acetyl-D-Glucosamine Stimulate Peripheral Blood Mononuclear Cell-Mediated Antitumor Immune Responses…	0.110874	0.019023	0.089671	0.007746	1.53628	0.042751	281	0	0.708856	0.031053	0.137089	0.046714	0.977582	0.353715	37	22	0.62593	0.105063
FDB031134	prostaglandin-H2	0	YIBNHAJFJUQSRA-YNNPMVKQSA-N	Abiyuch|Acorn|Adzuki bean|Alfalfa|Allium (Onion)|Allspice|Almond|Amaranth|American cranberry|American pokeweed|Angelica|Anise|Apple|Apricot|Arrowroot|Asparagus|Avocado|Bamboo shoots|Banana|Barley|Bilberry|Bitter gourd|Black chokeberry|Black elderberry|Black salsify|Black walnut|Black-eyed pea|Blackcurrant|Borage|Brazil nut|Breadfruit|Broad bean|Broccoli|Brussel sprouts|Burdock|Butternut|Cabbage|C…	Fatty Acyls/Eicosanoids	Negative: Prostaglandin h2 (PGH2) is involved in metabolic pathways including the regulation of the constriction and dilation of blood vessels and stimulating platelet activation. PGH2 is ultimately converted by the enzyme Thromboxane A Synthase 1 into Thromboxane A2 (TxA2) . TxA2 leads to platelet activation and aggregation. This may be negative for COVID-19 patients as a pro-thrombotic state ha…	﻿Rucker, Dane, and Amit S. Dhamoon. 2020. StatPearls Physiology, Thromboxane A2. StatPearls Publishing. http://www.ncbi.nlm.nih.gov/pubmed/30969639 (November 16, 2020) ; ﻿Smyth, Emer M. 2010. “Thromboxane and the Thromboxane Receptor in Cardiovascular Disease.” Clinical lipidology 5(2): 209–19. http://www.ncbi.nlm.nih.gov/pubmed/20543887 (November 16, 2020) ; ﻿Zhang, Si et al. 2020. “SARS-CoV-2 B…	0.112059	0.006351	0.089906	0.000704	1.5294	0.006187	148	0	0.708643	0.021444	0.139671	0.057277	0.984465	0.288373	25	10	0.633155	0.128416
FDB005841	Naphthalen-1-ol	0	KJCVRFUGPWSIIH-UHFFFAOYSA-N	Black walnut	Naphthalenes/Naphthols and derivatives	Napthalene based inhibitors of SARS-CoV-2 PLpro enzyme have shown potential success which would prevent effective viral replication.	Rees, Victoria. “Naphthalene-Based PLpro Inhibitors Show Potential as COVID-19 Therapeutics.” https://pubs.acs.org/doi/10.1021/acsinfecdis.0c00168.	0.130201	0.026929	0.09061	0.011033	1.52541	0.028922	306	0	0.705525	0.010891	0.187089	0.065728	0.757443	0.249262	26	11	0.486862	0.137687
FDB008735	1,2,3-Benzenetriol	0	WQGWDDDVZFFDIG-UHFFFAOYSA-N	Arabica coffee|Coffee	Phenols/Benzenetriols and derivatives	1,2,3-Benzenetriol (pyrogallol) found to cause increased inactivation of SARS-CoV-2 compared to Saxifraga spinulosa-derived components not enriched with pyrogallol. This effect was attributed to the disruption of virus genomes and proteins . However this compound has also been reported to cause intracellular increases in reactive oxygen species (ROS) .	﻿Takeda, Yohei et al. 2020. “Saxifraga Spinulosa-Derived Components Rapidly Inactivate Multiple Viruses Including SARS-CoV-2.” Viruses 12(7). http://www.ncbi.nlm.nih.gov/pubmed/32605306 (November 16, 2020) ; ﻿Lu, Zhiying et al. 2016. “Effects of Pyrogallic Acid on Microcystis Aeruginosa: Oxidative Stress Related Toxicity.” Ecotoxicology and Environmental Safety 132: 413–19. https://www.sciencedir…	0.135752	0.016688	0.094131	0.003286	1.47766	0.013545	300	0	0.694908	0.001981	0.195775	0.084742	0.762686	0.386734	25	10	0.519569	0.168
ADDITIONAL AGGREGATE
ID	Name	Approved	InChIKey	Foods	Class (Class/Subclass)	Mechanism	Reference	GeoMean(r_vals(neg)_median)	GeoMean(r_vals(neg)_MAD)	wiki_r_vals(neg)_median	wiki_r_vals(neg)_MAD	wiki_Normalized_correlation_median	wiki_Normalized_correlation_MAD	wiki_Gene_connection_counts_median	wiki_Gene_connection_counts_MAD	wiki_Probability_estimate_median	wiki_Probability_estimate_MAD	aggr_r_vals(neg)_median	aggr_r_vals(neg)_MAD	aggr_Normalized_correlation_median	aggr_Normalized_correlation_MAD	aggr_Gene_connection_counts_median	aggr_Gene_connection_counts_MAD	aggr_Probability_estimate_median	aggr_Probability_estimate_MAD
FDB005473	Esterase	0	AXOJRQLKMVSHHZ-UHFFFAOYSA-N	Cabbage|Common wheat|Fig|Rice|Soy bean|White cabbage|Wild leek	NA/NA Alkaloids and derivatives (superclass)	Esterase (FDB005473, Carboxylesterase) shown to be upregulated in plants infected with Tobacco mosaic virus, and increased expression is associated with other plant defence genes. However no data for activity of plant-derived carboxylesterase in humans.	Guo, Song, and Sek-Man Wong. 2020. “A Conserved Carboxylesterase Inhibits Tobacco Mosaic Virus (TMV) Accumulation in Nicotiana Benthamiana Plants.” Viruses 12(2): 195. https://www.mdpi.com/1999-4915/12/2/195 (November 16, 2020).	0.068	0.006	0.131	0.002	1.247	0.013	181	0	0.614	0.025	0.035	0.016	2.368	0.516	28	0	0.909	0.05
FDB011477	(-)-alpha-Narcotine	0	AKNNEGZIBPJZJG-MSOLQXFVSA-N	Opium poppy	Phthalide isoquinolines	Anti-inflammatory: (-)-alpha-Narcotine (Narcotine/Capval/Noscapine) is being investigated for its potential to attenuate excessive cytokine release in COVID-19. Noscapine inhibits the effect of bradykinin. In COVID-19, it has been hypothesised that bradykinin signalling is involved in respiratory symptoms and complications, therefore Noscapine holds potential to attenuate this.	﻿Roche, Joseph A., and Renuka Roche. 2020. “A Hypothesized Role for Dysregulated Bradykinin Signaling in COVID‐19 Respiratory Complications.” The FASEB Journal 34(6): 7265–69. https://onlinelibrary.wiley.com/doi/abs/10.1096/fj.202000967 (November 16, 2020) ; ﻿MOORAKI, AHMAD et al. 2005. “Noscapine Suppresses Angiotensin Converting Enzyme Inhibitors-Induced Cough.” Nephrology 10(4): 348–50. http:/…	0.076	0.009	0.102	0.003	1.444	0.051	315	0	0.68	0.012	0.057	0.027	1.694	0.423	197	0	0.825	0.08
FDB000683	Nobiletin	0	MRIAQLRQZPPODS-UHFFFAOYSA-N	Lemon|Mandarin orange (Clementine, Tangerine)|Sweet bay|Sweet orange	Flavonoids/O-methylated flavonoids	Anti-SARS-CoV-2: Citrus sp. contains several methoxy flavonoids, such as hesperetin, tangeretin, naringenin, and nobiletin which bind to the (comparable with the reference ligands, lopinavir and nafamostat) to the three essential receptors. Anti-Inflammatory: Nobiletin inhibits Interleukin-β (IL-1β) -induced inflammation in chondrocytes via suppression of nuclear factor kappa-light-chain-enhancer…	﻿Yi, Ling et al. 2004. “Small Molecules Blocking the Entry of Severe Acute Respiratory Syndrome Coronavirus into Host Cells.” Journal of virology 78(20): 11334–39. http://www.ncbi.nlm.nih.gov/pubmed/15452254 (November 16, 2020) ; ﻿Yi, Ling et al. 2004. “Small Molecules Blocking the Entry of Severe Acute Respiratory Syndrome Coronavirus into Host Cells.” Journal of virology 78(20): 11334–39. http:…	0.08	0.012	0.109	0.003	1.389	0.02	164	0	0.662	0.013	0.059	0.05	1.645	0.761	115	49	0.815	0.161
FDB005755	1,4-Benzoquinone	0	AZQWKYJCGOJGHM-UHFFFAOYSA-N	Anise|Barley|Olive	Organooxygen compounds/Carbonyl compounds	Pro-Inflammatory: The benzene metabolite 1,4-benzoquinone reduces regulatory T-cell function. This is predicted to have a negative effect in COVID-19 patients as T regulatory cells function to maintain normal inflammatory levels via. inhibition of adaptive and innate immune cell activation and production of anti-inflammatory cytokines (IL-10, Transforming growth factor-β (TGF-β) and IL-35).	﻿Winter, Marcus et al. 2017. “The Benzene Metabolite 1,4-Benzoquinone Reduces Regulatory T-Cell Function: A Potential Mechanism for Tobacco Smoke-Associated Atopic Dermatitis.” The Journal of allergy and clinical immunology 140(2): 603–5. http://www.ncbi.nlm.nih.gov/pubmed/28274748 (November 16, 2020) ; ﻿Stephen-Victor, Emmanuel et al. 2020. “Potential of Regulatory T Cell-Based Therapies in the …	0.085	0.016	0.155	0.015	1.138	0.042	304	0	0.59	0.003	0.047	0.016	2.012	0.499	25	10	0.869	0.056
FDB005049	Linonin	0	KBDSLGBFQAGHBE-MSGMIQHVSA-N	Lemon	Prenol lipids/Triterpenoids	Immunomodulatory/anti-inflammatory: Linonin has been shown to regulate CD4+ T cell mediated inflammation and inhibit cellular proliferation by inhibition of NFκB translocation (1-2). In Linonin effectively inhibits p38 activated mitogen-activated protein kinase (MAPK) activity, a target in COVID-19.	﻿Grimes, Joseph M, and Kevin V Grimes. 2020. “P38 MAPK Inhibition: A Promising Therapeutic Approach for COVID-19.” Journal of molecular and cellular cardiology 144: 63–65. http://www.ncbi.nlm.nih.gov/pubmed/32422320 (November 16, 2020) ; ﻿Kim, Jinhee, Guddadarangavvanahally K. Jayaprakasha, Mariappan Muthuchamy, and Bhimanagouda S. Patil. 2011. “Structure–Function Relationships of Citrus Limonoid…	0.086	0.014	0.12	0.007	1.308	0.093	267	0	0.635	0.035	0.061	0.028	1.673	0.463	197	0	0.816	0.084
FDB008533	2-Ethylpyrazine	0	KVFIJIWMDBAGDP-UHFFFAOYSA-N	Fenugreek|Potato|Tea	Diazines/Pyrazines	The main therapeutic potential of 2-Ethylpyrazine is its activation of nitric oxide (NO) synthase in the endothelium and release of NO, giving vasodilation effects . Vasodilators are attractive therapy for COVID-19 for respiratory and pulmonary benefit.	﻿Ashigai, Hiroshi et al. 2017. “2-Ethylpyrazine Induces Vasodilatation by Releasing Nitric Oxide in the Endothelium.” Biological & pharmaceutical bulletin 40(12): 2153–57. http://www.ncbi.nlm.nih.gov/pubmed/28966226 (November 16, 2020).	0.09	0.012	0.13	0.005	1.203	0.017	222	0	0.598	0.005	0.063	0.03	1.66	0.483	197	0	0.809	0.091
FDB005844	Plumbagin	0	VCMMXZQDRFWYSE-UHFFFAOYSA-N	Black walnut|Common walnut|Japanese persimmon|Persimmon	Naphthalenes/Naphthoquinones	Anti-Inflammatory: Plumbagin (5-hydroxy-2-methyl-1, 4-naphthoquinone), a quinone isolated from the roots of Plumbago zeylanica was recently reported to suppress the activation of NFκB in tumor cells.	﻿Checker, Rahul et al. 2009. “Anti-Inflammatory Effects of Plumbagin Are Mediated by Inhibition of NF-KappaB Activation in Lymphocytes.” International immunopharmacology 9(7–8): 949–58. http://www.ncbi.nlm.nih.gov/pubmed/19374955 (November 16, 2020).	0.092	0.016	0.191	0.018	0.911	0.003	115	0	0.502	0.01	0.044	0.015	2.106	0.482	25	6	0.872	0.06
FDB005871	Artemorin	0	JNHKVMWTQCZYHK-CVZWCJCVSA-N	Sweet bay	Prenol lipids/Terpene lactones	Anti-inflammatory: Possible that Artemorin is an agonist of bitter taste receptor (TAS2Rs) . The bitter taste receptors (to which chloroquine also acts as an agonist) have other roles than just chemosensing and have been suggested to be involved in cytokine sensing , and as such may be a attractive target for treating the COVID-19 cytokine storm.	﻿Grassin-Delyle, Stanislas et al. 2019. “Bitter Taste Receptors (TAS2Rs) in Human Lung Macrophages: Receptor Expression and Inhibitory Effects of TAS2R Agonists.” Frontiers in Physiology 10: 1267. https://www.frontiersin.org/article/10.3389/fphys.2019.01267/full (November 16, 2020) ; ﻿Levit, Anat et al. 2014. “The Bitter Pill: Clinical Drugs That Activate the Human Bitter Taste Receptor TAS2R14.”…	0.092	0.013	0.131	0.006	1.192	0.055	197	0	0.612	0.018	0.064	0.031	1.66	0.483	197	0	0.809	0.092
FDB012370	Selenomethionine	0	RJFAYQIBOAGBLC-UHFFFAOYSA-N	Abiyuch|Acorn|Adzuki bean|Alfalfa|Allium (Onion)|Allspice|Almond|Amaranth|American cranberry|American pokeweed|Angelica|Anise|Apple|Apricot|Arrowroot|Asparagus|Avocado|Bamboo shoots|Banana|Barley|Bilberry|Bitter gourd|Black chokeberry|Black elderberry|Black salsify|Black walnut|Black-eyed pea|Blackcurrant|Borage|Brazil nut|Breadfruit|Broad bean|Broccoli|Brussel sprouts|Burdock|Butternut|Cabbage|C…	Carboxylic acids and derivatives/Amino acids, peptides, and analogues	Anti-SARS-CoV-2: Selenium deficiency linked with poorer outcomes following infection.	﻿Hiffler, Laurent, and Benjamin Rakotoambinina. 2020. “Selenium and RNA Virus Interactions: Potential Implications for SARS-CoV-2 Infection (COVID-19).” Frontiers in Nutrition 7: 164. https://www.frontiersin.org/article/10.3389/fnut.2020.00164/full (November 16, 2020).	0.097	0.023	0.169	0.018	1.085	0.02	301	0	0.563	0.001	0.055	0.029	1.871	0.559	25	7	0.829	0.093
FDB015388	Di-2-propenyl sulfide	0	UBJVUCKUDDKUJF-UHFFFAOYSA-N	Garden cress|Garden onion|Garlic|Horseradish|Radish|Soft-necked garlic|Wild leek	Allyl sulfur compounds	Anti-SARS-CoV-2: Research into the interactions of garlic essential oil has presented di-2-propenyl sulfide (allyl sulfide) in molecular docking interactions, showing this compound has strong amino acid interactions with both ACE2 and the main SARS-CoV-2 protease (PDB6LU7) and exhibited good inhibition of these. This suggests that this compound may bind ACE2 receptor and inhibit virus binding and…	﻿Thuy, Bui Thi Phuong et al. 2020. “Investigation into SARS-CoV-2 Resistance of Compounds in Garlic Essential Oil.” ACS omega 5(14): 8312–20. http://www.ncbi.nlm.nih.gov/pubmed/32363255 (November 16, 2020).	0.097	0.02	0.119	0.007	1.316	0.028	98	0	0.65	0.012	0.08	0.056	1.46	0.418	26	11	0.76	0.144
FDB005974	Mangiferol	0	AEDDIBAIWPIIBD-ZJKJAXBQSA-N	Mango	Benzopyrans/1-benzopyrans	Mangiferol has potential pharmacological effects including, antioxidant, antiviral and immunomodulatory activities . It has been shown to suppress expression of matrix metalloproteinase-9/-7 (MMP-9 and MMP-7) and inhibiting activation of the β-catenin pathway. This may provide therapeutic effect to COVID-19 patients as MMP-9 has been shown increased at early stages of disease with respiratory fai…	﻿Ueland, T et al. 2020. “Distinct and Early Increase in Circulating MMP-9 in COVID-19 Patients with Respiratory Failure.” The Journal of infection 81(3): e41–43. http://www.ncbi.nlm.nih.gov/pubmed/32603675 (November 16, 2020) ; ﻿Taylor, Krystyna et al. 2020. “Analysis of Genetic Host Response Risk Factors in Severe COVID-19 Patients.” medRxiv: 2020.06.17.20134015. https://www.medrxiv.org/content/…	0.112	0.024	0.171	0.016	0.992	0.017	62	0	0.521	0.006	0.073	0.036	1.634	0.511	26	0	0.778	0.112
FDB011903	3,3',4,4'-Tetrahydroxylignan	0	HCZKYJDFEPMADG-UHFFFAOYSA-N	Flaxseed	Dibenzylbutane lignans	3,3',4,4'-Tetrahydroxylignan (Nordihydroguaiaretic acid (NDGA)) is found to activate nuclear factor erythroid 2 (NFE2)-related factor 2 (NRF2), which promotes expression of antioxidant enzymes. This contributes to the other antioxidative activities of NDGA, such as free radical scavenging, which are very potent.	Manda, Gina et al. 2020. “Nordihydroguaiaretic Acid: From Herbal Medicine to Clinical Development for Cancer and Chronic Diseases.” Frontiers in Pharmacology 11: 151. https://www.frontiersin.org/article/10.3389/fphar.2020.00151/full (November 16, 2020).	0.119	0.013	0.163	0.004	1.022	0.093	116	0	0.532	0.023	0.087	0.05	1.389	0.514	26	11	0.741	0.13
FDB002775	Aesculetin	0	ILEDWLMCKZNDJK-UHFFFAOYSA-N	Barley|Carrot|Chicory|Cocoa bean|Common bean|Dandelion|Dill|Highbush blueberry|Horseradish|Mugwort|Olive|Opium poppy|Peanut|Sweet basil|Tarragon|Wild carrot|Wild leek	Coumarins and derivatives/Hydroxycoumarins	Anti-SARS-CoV-2: Psoralen, bergapten, imperatorin, heraclenin, heraclenol, saxalin, oxypeucedanin, angelicin, toddacoumaquinone, aesculetin were the most strongly suggested compounds that originate in therapeutic plants that might act as significant inhibitors of COVID-19 main protease (3CLpro).	Chidambaram, Sathish Kumar et al. 2020. “In Silico Molecular Docking: Evaluation of Coumarin Based Derivatives against SARS-CoV-2.” Journal of infection and public health 13(11): 1671–77. http://www.ncbi.nlm.nih.gov/pubmed/33008777 (November 16, 2020).	0.128	0.015	0.186	0.004	0.924	0.03	100	0	0.519	0.023	0.088	0.052	1.38	0.664	42	25	0.716	0.181
